# Supplementary material for: Analysis of Nipah Virus Replication and Host Proteome Response Patterns in Differentiated Porcine Airway Epithelial Cells Cultured at the Air–Liquid Interface
Source: MDPI journal article supplement (doi:10.3390/v15040961), 2023-04-13
Supplement: s1 [file s1]

Parameter Value  
Version 2.0.2.0  
User name lc-user  
Machine name RIE-PC-N-20-054  
Date of writing 08/31/2021 05:00:31  
Include contaminants True  
PSM FDR 0.01  
PSM FDR Crosslink 0.01  
Protein FDR 0.01  
Site FDR 0.01  
Use Normalized Ratios For Occupancy True  
Min. peptide Length 7  
Min. score for unmodified peptides 0  
Min. score for modified peptides 40  
Min. delta score for unmodified peptides 0  
Min. delta score for modified peptides 6  
Min. unique peptides 0  
Min. razor peptides 1  
Min. peptides 1  
Use only unmodified peptides and True  
Modifications included in protein quantification Oxidation (M);Acetyl  
(Protein N-term)  
Peptides used for protein quantification Razor  
Discard unmodified counterpart peptides True  
Label min. ratio count 2  
Use delta score False  
iBAQ True  
iBAQ log fit True  
Match between runs False  
Find dependent peptides False  
Fasta file C:\pSEQ\EMBL\_Sscr\NiV-Sscrofa11.1.2019-08-07-forpeaks.fasta  
Decoy mode revert  
Include contaminants True  
Advanced ratios True  
Fixed andromeda index folder  
Combined folder location F:\Data\A170.dda\MQ.test-2-samples  
Second peptides True  
Stabilize large LFQ ratios True  
Separate LFQ in parameter groups False  
Require MS/MS for LFQ comparisons True  
Calculate peak properties False  
Main search max. combinations 200  
Advanced site intensities True  
Write msScans table False  
Write msmsScans table True  
Write ms3Scans table True  
Write allPeptides table True  
Write mzRange table True  
Write DIA fragments table True  
Write DIA fragments quant table True  
Write pasefMsmsScans table True  
Write accumulatedMsmsScans table True  
Max. peptide mass [Da] 4600  
Min. peptide length for unspecific search 8  
Max. peptide length for unspecific search 25  
Razor protein FDR True  
Disable MD5 False  
Max mods in site table 3  
Match unidentified features False  
Epsilon score for mutations F:\Data\A170.dda\MQ.test-2-samples

```

Evaluate variant peptides separately      True
Variation mode      None
MS/MS tol. (FTMS)      20 ppm
Top MS/MS peaks per Da interval. (FTMS) 12
Da interval. (FTMS)      100
MS/MS deisotoping (FTMS)      True
MS/MS deisotoping tolerance (FTMS)      7
MS/MS deisotoping tolerance unit (FTMS) ppm
MS/MS higher charges (FTMS) True
MS/MS water loss (FTMS)      True
MS/MS ammonia loss (FTMS)      True
MS/MS dependent losses (FTMS)      True
MS/MS recalibration (FTMS)      False
MS/MS tol. (ITMS)      0.5 Da
Top MS/MS peaks per Da interval. (ITMS) 8
Da interval. (ITMS)      100
MS/MS deisotoping (ITMS)      False
MS/MS deisotoping tolerance (ITMS)      0.15
MS/MS deisotoping tolerance unit (ITMS) Da
MS/MS higher charges (ITMS) True
MS/MS water loss (ITMS)      True
MS/MS ammonia loss (ITMS)      True
MS/MS dependent losses (ITMS)      True
MS/MS recalibration (ITMS)      False
MS/MS tol. (TOF) 40 ppm
Top MS/MS peaks per Da interval. (TOF) 10
Da interval. (TOF)      100
MS/MS deisotoping (TOF)      True
MS/MS deisotoping tolerance (TOF) 0.01
MS/MS deisotoping tolerance unit (TOF) Da
MS/MS higher charges (TOF)      True
MS/MS water loss (TOF) True
MS/MS ammonia loss (TOF)      True
MS/MS dependent losses (TOF) True
MS/MS recalibration (TOF)      False
MS/MS tol. (Unknown) 20 ppm
Top MS/MS peaks per Da interval. (Unknown) 12
Da interval. (Unknown) 100
MS/MS deisotoping (Unknown) True
MS/MS deisotoping tolerance (Unknown) 7
MS/MS deisotoping tolerance unit (Unknown) ppm
MS/MS higher charges (Unknown)      True
MS/MS water loss (Unknown) True
MS/MS ammonia loss (Unknown) True
MS/MS dependent losses (Unknown) True
MS/MS recalibration (Unknown)      False
Site tablesOxidation (M) Sites.txt

```
