# Supplementary material for: Analysis of Nipah Virus Replication and Host Proteome Response Patterns in Differentiated Porcine Airway Epithelial Cells Cultured at the Air–Liquid Interface
Source: Viruses. 2023 Apr 13;15(4):961. doi: 10.3390/v15040961 (PMC10143807; doi:10.3390/v15040961)
Supplement: Supplementary file 1 [file viruses-15-00961-s001.zip]

Archive with 9 entries (9 files):
- List S1_ MQ parameters.pdf
- Supplementary Material S1_methods.pdf
- Supplementary Material S2_primers and antibodies.pdf
- Table S1_Gene list used for enrichment analysis.xlsx
- Table S2_CytoScape_ClueGO Parameters & Results downregulated.xls
- Table S3_CytoScape_ClueGO Parameters & Results upregulated.xls
- Table S4_Enrichment analysis_gProfiler_Neumann - Kopie.xlsx
- Table S5_Enrichment analysis_gProfiler.xlsx
- Table S6_Summary_DEGs.xlsx
