# Supplementary material for: Analysis of Nipah Virus Replication and Host Proteome Response Patterns in Differentiated Porcine Airway Epithelial Cells Cultured at the Air–Liquid Interface
Source: Viruses. 2023 Apr 13;15(4):961. doi: 10.3390/v15040961 (PMC10143807; doi:10.3390/v15040961)
Supplement: Supplementary file 1 [file viruses-15-00961-s001.zip › Table S1_Gene list used for enrichment analysis.xlsx]

## Sheet: Overview
Sheet 1	List of gene identifier based on von Neumann trend analysis used for enrichment analysis using gProfiler
Sheet 2	List of up- and downregulated differentially expressed genes subjected to enrichment analysis in Cytoscape

## Sheet: #1 von Neumann trend analysis
HGNC
AACS
ABHD10
ABITRAM
ACOT4
ADAM9
ADPRH
ADPRS
AHNAK
AK9
ALG12
ANPEP
ANXA5
APEH
ARF4
ARFGEF3
ARMT1
ARPC2
ARRDC1
ASNS
ATAD1
ATP1B1
ATP2C2
ATP6V0A2
ATP6V0A4
ATXN3
ATXN3L
B2M
BAG6
BAIAP2
BAIAP2L1
BAIAP2L2
BDH1
BPIFB1
BST1
BZW2
C3
C4A
C4B
CAMSAP3
CAPZA1
CATIP
CCDC61
CD55
CD70
CD82
CEACAM21
CEP43
CERS2
CFAP298-TCP10L
CFB
CFI
CFP
CHI3L1
CHST4
CLCC1
CMPK2
CNP
CNTNAP1
COBLL1
COG1
COG4
COPA
CP
CPSF6
CRELD1
CRELD2
CRISP3
CRYL1
CSNK2A1
CSNK2A3
CXorf38
CYB5B
CYFIP2
CYP2A13
CYP2A6
CYP2A7
CYP2F1
DBNL
DDOST
DDX17
DDX18
DDX20
DDX21
DDX60
DES
DHCR7
DNAJB11
DNAJC13
DNPEP
DPEP2
DPEP3
DPP4
DPP8
DSP
DUOX2
ECM1
EDC3
EEF1D
EFEMP1
EIF3F
EMC1
EMC10
ENOSF1
ENPP2
ENPP3
ENSSSCG00000000361
ENSSSCG00000001658
ENSSSCG00000002965
ENSSSCG00000013720
ENSSSCG00000013725
ENSSSCG00000013726
ENSSSCG00000025316
ENSSSCP00000001169
ENSSSCP00000007894
ENSSSCP00000008541
ENSSSCP00000008560
ENSSSCP00000009600
ENSSSCP00000012377
ENSSSCP00000013769
ENSSSCP00000014233
ENSSSCP00000015486
ENSSSCP00000015736
ENSSSCP00000018643
ENSSSCP00000021371
ENSSSCP00000023232
ENSSSCP00000023924
ENSSSCP00000034434
ENSSSCP00000034984
ENSSSCP00000035339
ENSSSCP00000037505
ENSSSCP00000039717
ENSSSCP00000039824
ENSSSCP00000041856
ENSSSCP00000047120
ENSSSCP00000053458
ENSSSCP00000054766
ENSSSCP00000055001
EPS15L1
EPS8
EPS8L2
ERAP1
ERC1
ERCC3
ERGIC1
ERMP1
ERP44
EZR
FAH
FAM114A2
FOLR1
FXR1
GALNT7
GART
GBP6
GGH
GIPC1
GIPC3
GMPR
GNL1
GOT1
GPRC5A
GPRC5C
GRHPR
GRN
GSS
GSTZ1
H3-2
HERC5
HIKESHI
HLA-A
HLA-B
HLA-C
HLA-E
HLA-F
HLA-G
HM13
HMGB3
HNRNPD
HNRNPH2
HNRNPK
HPRT1
HSPA1A
HSPA1B
HSPA4
HSPA8
IDI1
IDO1
IFIT3
IPO5
IPO7
KARS1
KIFAP3
KRT15
KRT7
KRT8
LAGE3
LAMA3
LAMB3
LAMC1
LAMC2
LASP1
LDLRAD1
LGALS3BP
LMNA
LMO7
LNPK
LSS
LTA4H
LTF
MAIP1
MAST4
METAP2
METTL26
MFF
MMP7
MOCS1
MORC3
MTCH2
MTURN
MUC13
MUC4
MVD
MYH14
NAP1L4
NAXD
NCLN
NCSTN
NDUFA13
NDUFB7
NDUFS8
NDUFV3
NECTIN2
NLE1
NME3
NOL6
NOMO1
NOMO2
NOMO3
NOXA1
NPC1
NPEPPS
NT5C2
NT5C3A
NT5DC1
NUP58
OASL
OTUD6B
P2RX4
PACSIN2
PADI1
PADI3
PADI4
PAM
PANK4
PARP14
PBX1
PCCB
PDAP1
PDCD6IP
PDCL3
PDLIM1
PGAM1
PGAM2
PGAP1
PGLYRP1
PHB
PHB2
PIGK
PIH1D1
PLAT
PLAU
PLCD1
PLOD3
PLPP1
PLSCR1
PNP
PNPT1
POLR2J3
PPFIBP2
PPIL1
PPP3CA
PPP3CB
PRDX2
PRDX4
PRKAB2
PRPH
PRSS22
PSAP
PSMA3
PSMB9
PSMD6
PSME1
PTK7
PTPN1
PTPRJ
PYCR1
QPCT
QSOX1
RBM8A
RBP4
RIPK1
RPL32
RPS25
RSU1
RTN3
S100A1
S100A8
S100A9
SDCBP
SDHA
SEL1L
SELENBP1
SEPHS1
SERPING1
SIRPA
SIRPB1
SIRPG
SLC25A24
SLC25A31
SLC25A5
SLC35A3
SLC3A2
SLC5A1
SLC5A8
SLPI
SMARCB1
SMPDL3B
SNRPA1
SPATA6L
SPCS2
SPTLC1
SRP19
SSR1
SSR4
ST3GAL1
STAM
STAT1
STEAP4
STK4
STOM
STRAP
SURF4
TARS1
TARS3
TBC1D13
TCIRG1
TCN1
TFRC
THUMPD1
THY1
TIA1
TIAL1
TIMP1
TKFC
TM9SF2
TM9SF3
TMC5
TMED7-TICAM2
TMEM19
TMEM209
TMLHE
TMPRSS2
TOMM40
TOPORS
TRIM28
TTC38
TTLL12
TUBA4A
U2AF2
UBA1
UBA7
UBXN6
UGGT1
UGT1A3
UGT1A4
UGT1A5
UPK1B
UPK3BL1
UPK3BL2
VDAC3
VIM
VMO1
VNN1
VNN2
VPS41
VPS4B
VSNL1
WASHC4
WIPI2
XDH
YARS2
YWHAQ
ZFYVE19
ZMPSTE24
ZW10

## Sheet: #2 DEG for Cytoscape
List of significantly up and down regulated genes based on comparison of early (1dpi, 2dpi) and late (9dpi, 12dpi) stages of infection performed in Perseus
upregulated	downregulated
TSPO	TTC38
PACSIN2	NAGA
PICK1	SNU13
TUBA4B	KRT18;KRT32
AQP5	ENSSSCG00000000364
ENSSSCG00000000379	TPI1
STAT2	ENSSSCP00000000958
CPSF6	UBE2NL
ENSSSCP00000000550	H1-3
IPO8	FAH
DERA	HDDC3
EPS8	ALDH6A1
BCL2L14	ATXN3;ATXN3L
USP18;USP41	ATP2C2
TXNRD1	CYP2F1
HSP90B1	AKR7L
NT5DC3	PGM1
UTP20	HYI
SLC5A8	CEP43
LMF2	ARMT1
ALG12	ECHDC1
CRELD2	BRWD1;PHIP
RIPK1	MNS1
SERPINB1	DPP8
ENSSSCP00000001103	SMARCA2
GMPR	SNRPA1
ENSSSCP00000001236	PBX1
HLA-A;HLA-B;HLA-C;HLA-E;HLA-F;HLA-G	HDGF
DDR1	LMNA
C2	PSMD4
CFB	KYAT3
C4A;C4B	STX4
TAP2	TSGA10
PSMB8	RAB1A
PSMB9	C2orf73
TAP1	MTA3
ZBTB22	YWHAQ
DAXX	HNRNPD
BAK1	ATXN2
CMTR1	SRSF9
XPO5	SMARCB1
HSP90AB1	TIAL1
ADGRF1	ADIPOR1
CIB1	ARMC3
PML	LZTFL1
NPTN	ATP5PO
PRORP	UBA1
IPO4	ENSSSCP00000013750
PSME2	PRDX5
OXA1L	TKFC
CHD2	PSMC3
GPHN	PGLS
ENSSSCP00000002606	NDUFA13
WARS1	SLC25A46
KLC1	ENSSSCP00000015486
KARS1	ENSSSCP00000046006
VAC14	ENSSSCP00000015736
CHST4	FMO1
HP;HPR	PLEKHA6
KATNB1	HNRNPA3
ADGRG1	TUBA4A
PEPD	ANXA6
LIPE	ENSSSCP00000018423
ENSSSCP00000054940	KRT15
CLPTM1	KRT14;KRT35
ENSSSCP00000003417	LUC7L3
RPS11	SPATA20
MYADM	ENSSSCP00000020000
TMC4	PLCD1
ATAD3A	AKR1A1
ACOT7	ADI1
FBXO6	UBE2V1
KIAA2013	RPA3
PLOD1	ENSSSCP00000023232
EPHA2	BDH2
ARHGEF10L	ENSSSCG00000024221
DDOST	PIN1
ECE1	HIKESHI
CDC42	ENKD1
SLC9A1	HNRNPK
EYA3	ALDH1A1
SMPDL3B	PTER
PPP4R1	NLE1
NPC1	FAM151B
LAMA3	MAGT1
SRSF11	IL18
FGGY	DES;PRPH;VIM
TACSTD2	HNRNPM
PLPP3	CFAP298-TCP10L
TSPAN1	LSM6
EZR	DDX17
PCMT1	ENSSSCP00000032557
VNN2	AHNAK
VNN1	ENSSSCP00000034434
SEC63	SEPHS1
SMPD2	MTURN
FRK	CTSD
ME1	HNRNPH2
BCKDHB	EWSR1
CD109	ENSSSCP00000036255
MYO5B	HNRNPDL
ME2;ME3	FABP5
MYO1E;MYO1F	TOLLIP
MYO5C	PRDX2
DUOX2	KRT8
B2M	LNPK
TMEM62	DYNLRB1
TMEM87A	CRYL1
NDUFAF1	PDCL3
SERPINB8	CCT3
SERPINB2	CEBPB
PSMA3	CYP2A13;CYP2A6;CYP2A7
ENSSSCP00000005474	MRPL41
TTC39B	TOM1
ERMP1	CCDC61
TBC1D2	ENSSSCP00000052236
GALNT12	ARL3
NIPSNAP3A	MFF
LCN2	CBR1
LRRC8A	U2AF2
SETX	TRIM28
AGO2	ENSSSCP00000058334
ST3GAL1	H1-0
SQLE
ENPP2
EMC2
LRRCC1
VCPIP1
SDCBP
MCM4
KIFAP3
HSD17B7
NCSTN
COPA
ADAR
SLC27A3
S100A9
CTSS
OTUD7A;OTUD7B
ACP6
RHOC
DENND2D
WDR47
SLC35A3
GBP2
ASAH1
IDO1
VDAC3
IKBKB
PLAT
FERMT1
C20orf27
IDH3B
HM13
BPIFB1
GGT7
DLGAP4
RPN2
IFT52
ENSSSCP00000007894
PTPN1
ZBP1
FSCN1
BAIAP2L1;BAIAP2L2
ARPC1A
SPNS1
UQCRC2
CRYM
TMC5
ABAT
TRAP1
ENSSSCP00000008560
NME3
TELO2
CIAO1
LMAN2L
HK2
MOGS
GFPT1;GFPT2
ENSSSCP00000008931
EFEMP1
QPCT
XDH
SLC35F6
RDH14
VSNL1
CMPK2
RSAD2
MFSD10
UBA6
STBD1
CAMK2D
CASP6
MCUB
PPP3CA;PPP3CB
PAN3
SUCLA2
FAM216B
IPO5
TUBGCP3
CUL4A
SYK
SPTLC1
GALNT7
ATP6V0A2
TMED2
P2RX4
OASL
MVK
PITPNB
TCN2
SLC5A1
TXNRD2
GNPAT
GALNT14;GALNT2
SUPV3L1
PPA1
PSAP
MCU
PLAU
VDAC2
GLUD1;GLUD2
ATAD1
IFIT3
IFIT5
FFAR4
RBP4
TCTN3
COX15
NPM3
NT5C2
PDZD8
ABRAXAS2
GOLM1
NOL6
BAG1
PIP4K2A
USP6NL
CTSV
EFHB
STT3B
PDCD6IP
UQCRC1
APEH
CDHR4
GNAI2
PDE12
ABHD6
PSMD6
EOGT
CRELD1
EMC3
TMEM43
DNAJC13
COPB2
CP
PRKCI
NDUFB5
DNAJB11
TFRC
MUC13
PARP14
UPK1B
CD47
CPOX
CBR1;CBR3
MORC3
CTPS2
PRDX4
TIMP1
CFP
ABCB7
PLS3
IDH3G
TMLHE
CD151
EPS8L2
CPT1A
ATP6V0A4;NDUFS8;TCIRG1
UNC93B1
ENSSSCP00000013769
EHD1
PPP1R32
MRPL16
SERPING1
PDHX
PLEKHA7
ENSSSCP00000014233
CFD
NCLN
PLIN5
C3
STXBP2
XAB2
ECSIT
ENSSSCG00000013720
CALR
NDUFB7
RAB8A
TPM4
COLGALT1
FKBP8
IBA57
SQSTM1
CANX
RAB24
SLCO4C1
PAM
MAN2A1;MAN2A2
CSNK1G3
ETF1
STING1
CD14
TRIM22
TRIM21
RRM1
SPCS2
GAB2
ENSSSCP00000015815
ENDOD1
MMP7
MMP13
CASP4;CASP5
TMPRSS4
VPS11
FMO4
STEAP4
ASNS
TSPAN13
CDHR3
CUL1
CHI3L1
QSOX1
LAMC1
LAMC2
LAMB3
C4BPB
ENSSSCP00000034984
CD55
CCNT2
AGA
TRAPPC11
TLR3
ADAM9
UGGT1
GPD2
ITGB6
DPP4
GALNT3;GALNT6
CALCRL
GLS
STAT1
GTF3C3
BZW1
WDR12
DNPEP
ACSL3
UGT1A3;UGT1A4;UGT1A5
NUB1
ENSSSCP00000017421
GARS1
TMED4
TARS1;TARS3
HMGCS1
ERGIC1
FAM114A2
SPARC
CHMP6
ENSSSCP00000018165
SGSH
GRB2
GRN
STAT3
DHX58
ACLY
CASC3
KPNB1
PHB
ABCC3
ENSSSCP00000018643
DHRS11
ACACA
SDF2
CPD
PRPF8
VMO1
MYH10
MT-CO2
SNX17
SMCHD1
HSD17B11
CD82
LY75;LY75-CD302
CFAP92
GHSR
VPS35L
TRAPPC12
MCM3
TAPT1
LDLRAD1
DENND5B
ERAP2
TCN1
SIRPA;SIRPB1;SIRPG
PCYOX1
KPNA1
CYP2J2
PRKD2;PRKD3
HERC5
PLOD3
ATPAF2
TIGAR
ISG20
TMX4
SAMD9
SLC3A2
PRMT5
ENSSSCP00000021371
DNAJC3
ECM1
NT5C3A
VPS37B
DAG1
EHD4
NDUFB10
ADA
FOLR1
ENSSSCG00000025316
F3
ANAPC4
PLCH1
LCLAT1
DPEP2;DPEP3
RNF213
TRMT1L
RRBP1
USP24
PLSCR1
NIF3L1
LCA5L
KRT23
EMC1
FLOT1
MSH6
ENSSSCP00000023924
STK39
DNAJC9
ENSSSCP00000024145
VWA8
GDPD1
ALDH1A3
DHCR7
NMI
C6orf120
DNAJA3
GABRP
ENSSSCP00000025028
ST6GAL1
WASHC4
GDE1
ACTN1;ACTN2
OPTN
TTC22
UBE2L6
ABCB8
TOMM40
GPRC5A
MICU2
GSPT1;GSPT2
IDI1
BZW2
GART
CKB
CAPNS1
GLG1
TMEM70
BSPRY
PANK4
RAP1GDS1
PHB2
ENSSSCG00000026407
ZMPSTE24
ELOVL5
MCM5
YARS2
BCAP29
PIGS
ENSSSCP00000029987
DTX3L
LTF
LPCAT3
SDHA
EPS8L1
ARMC9
UPP1;UPP2
PARP3
SDHC
DYNLT3
ACAD9
CRISP3
SSR4
S100A11
MOSPD2
ERAP1
CFHR4
SLC44A4
VPS28
ANPEP
MX1
ENPP3
GK;GK3P
BST1
PADI1;PADI3;PADI4
HSDL2
IFIT2
ENSSSCP00000029582
ENSSSCG00000000361
UBA7
NT5DC1
ACOT9
CXorf38
ICAM1
S100A8
NFKB2
CLDN4;CLDN6;CLDN9
NDUFB9
ITGAV
SMARCA4
ITGA6
TMTC3
PARP9
PGLYRP1
PLXND1
NCDN
DPP7
CAV1
MCM7
OAS2
EIF2B1
S100A12
GGH
XPO1
PSMB3
CHMP4A
PI3
PRSS8
FLNA
POLR3A
TMED7-TICAM2
ENSSSCP00000033526
MTERF3
MAP2K3
SURF4
IDH3A
TPM1
ARRDC1
KRT5
WFDC2
PIK3AP1
IFI16
GNE
IFIH1
POLR1C
GEMIN4
SPATS2L
LSS
TXNIP
MTCH2
CD70
ENSSSCP00000035465
GBP6
OGDH
TMX1
CAMK2G
SULT1E1
CASP10
LRRC8D
IGFBP7
GPRC5C
PI4KA
GLRX3
FYCO1
CEACAM21
CNP
RNASE4
TM9SF3
GOT2
PYCR1
CLCA4
FAM111A
HK3
NCS1
EXOC3
MCM6
PTPRJ
HADH
MGST1
SEL1L
ENSSSCG00000002965
TMEM19
XPOT
IPO7
SLPI
MRPS25
LGALS3BP
PAOX
ENSSSCP00000039510
ITFG1
APMAP
ENSSSCG00000013725;ENSSSCG00000013726
PGPEP1
MCCC1
SLFN11
SAMM50
ZC3H7B
ATP5F1C
BST2
EXOC8
ISG15
TCAF2;TCAF2C
PLIN2
NIPSNAP2
CISD1
PEA15
CYP51A1
GRPEL1
ENSSSCP00000041856
DDX60
TBL3
ISYNA1
PCCB
PSMD7
PIGK
KPNA5;KPNA6
TMPRSS2
ENSSSCP00000042585
CHEK1;STT3A
ENOSF1
ENSSSCP00000054766
SLC25A24
GET3
TMEM165
ENSSSCP00000044253
TPP2
PDCD6
MISP
HPRT1
ENSSSCP00000047120
PNP
LGALS9;LGALS9B;LGALS9C
HERC6
PNPT1
TOPORS
STK3
PRTFDC1
MUC5AC
THY1
PPP4R4
CFI
GIPC1;GIPC3
PRSS22
CBS;CBSL
QSOX2
ENSSSCP00000046549
MYO1D;MYO1G
SGPL1
SLC25A10
IFI44
OGFR
CLCC1
UQCC1
SLC25A6
AP3D1
FSTL1
ARHGDIB
NOL3
ERLEC1
TMCO1
PROM1
LMNA
STOM
TES
ERP44
SMG1
MUC4
ABCD4
LBP
COMMD4
VCPKMT
LY6D
ZNF512B
CYB5B
HEATR3
ENSSSCP00000053458
SIGMAR1
MX2
RAB35
ENSSSCP00000055001
RPL32
NOMO1;NOMO2;NOMO3
TM9SF2
PFKFB2
HSPA5
MAP2K1
BAIAP2
B3GNT7
QRICH1
NDUFB11
AGO1;AGO4
PSMB10
PSMB1
GIPC2
CSTF3
EIF4G1
TM9SF4
RPN1
CYFIP2
CHD1L
KRT14
ENSSSCP00000059291
MYO1B
NiV_C
NiV_F
NiV_G
NiV_L
NiV_M
NiV_N
NiV_P
NiV_V
NiV_W
