# Supplementary material for: Analysis of Nipah Virus Replication and Host Proteome Response Patterns in Differentiated Porcine Airway Epithelial Cells Cultured at the Air–Liquid Interface
Source: Viruses. 2023 Apr 13;15(4):961. doi: 10.3390/v15040961 (PMC10143807; doi:10.3390/v15040961)
Supplement: Supplementary file 1 [file viruses-15-00961-s001.zip › Table S3_CytoScape_ClueGO Parameters & Results upregulated.xls]

## Sheet: Parameters
Selection Citeria:
Statistical Test Used = Enrichment/Depletion (Two-sided hypergeometric test)
Use pvalue cutoff = true
pvalue cutoff = 0.001
Correction Method Used = Bonferroni step down
Min GO Level = 3
Max GO Level = 5
Cluster #1
Sample File Name = File selection: K:\AG-Karger\Elisabeth\Manuskripte\NiV-Ali\Results\List.MS 3_Genes_upregulated late.txt
Number of Genes = 5
Min Percentage = 1.0
GO Fusion = true
GO Group = true
Kappa Score Threshold = 0.4
Over View Term = SmallestPValue
Group By Kappa Statistics = true
Initial Group Size = 1
Sharing Group Percentage = 50.0
ClueGO Log:
### All results were created with ClueGO v2.5.8 ###
Organism analyzed: Homo Sapiens [9606]
Identifier types used: [SymbolID]
Evidence codes used: [All]
#Genes in KEGG_13.05.2021 : 8093
#Genes in GO_CellularComponent-EBI-UniProt-GOA-ACAP-ARAP_13.05.2021_00h00 : 18983
#Genes in GO_BiologicalProcess-EBI-UniProt-GOA-ACAP-ARAP_13.05.2021_00h00 : 18058

## Sheet: ClueGO Results
ID	Term	Ontology Source	Term PValue	Term PValue Corrected with Bonferroni step down	% Associated Genes	Nr. Genes	Associated Genes Found
GO:0045785	positive regulation of cell adhesion	GO_BiologicalProcess-EBI-UniProt-GOA-ACAP-ARAP_13.05.2021_00h00	5.51454e-07	0.000784719	8.69565	40	[ADA, ADAM9, ADGRG1, AP3D1, CALR, CAV1, CD47, CD55, CD70, CDC42, CIB1, DAG1, DNAJA3, DPP4, FERMT1, FLNA, FLOT1, GRB2, HLA-A, HLA-E, HLA-G, ICAM1, ITGA6, ITGAV, KIFAP3, LGALS9, MYADM, PLPP3, PPP3CA, PRKD2, PTPRJ, SIRPA, SIRPB1, SIRPG, SYK, TFRC, THY1, TIMP1, TPM1, VNN1]
KEGG:04610	Complement and coagulation cascades	KEGG_13.05.2021	4.5896e-07	0.000655395	17.6471	15	[C2, C3, C4A, C4B, C4BPB, CD55, CFB, CFD, CFHR4, CFI, F3, PLAT, PLAU, SERPINB2, SERPING1]
KEGG:05164	Influenza A	KEGG_13.05.2021	4.02845e-07	0.000576874	12.7907	22	[ADAR, BAK1, DNAJC3, ICAM1, IFIH1, IKBKB, KPNA1, KPNA5, KPNA6, MAP2K1, MX1, MX2, OAS2, PML, RSAD2, SLC25A6, STAT1, STAT2, TLR3, TMPRSS2, TMPRSS4, XPO1]
GO:0002221	pattern recognition receptor signaling pathway	GO_BiologicalProcess-EBI-UniProt-GOA-ACAP-ARAP_13.05.2021_00h00	1.49881e-07	0.000216728	11.9266	26	[BPIFB1, CAV1, CD14, CTSS, DDX60, DHX58, FLOT1, HSP90B1, IFIH1, IKBKB, LBP, LGALS9, LTF, NMI, OASL, PHB, PHB2, PIK3AP1, RIPK1, RSAD2, S100A8, S100A9, SMPDL3B, TLR3, TMED7-TICAM2, UNC93B1]
GO:0005788	endoplasmic reticulum lumen	GO_CellularComponent-EBI-UniProt-GOA-ACAP-ARAP_13.05.2021_00h00	9.28262e-08	0.000135155	10.2102	34	[ALG12, B2M, C3, C4A, CALR, CANX, CFP, COLGALT1, CP, DAG1, DNAJB11, DNAJC3, EOGT, ERAP1, ERAP2, ERLEC1, ERP44, F3, FSTL1, GNAI2, GOLM1, HSP90B1, HSPA5, IGFBP7, LAMC1, PLOD3, PPP3CA, QSOX1, SERPING1, TIMP1, TMEM43, TSPO, UGGT1, VCPIP1]
GO:0005829	cytosol	GO_CellularComponent-EBI-UniProt-GOA-ACAP-ARAP_13.05.2021_00h00	1.86219e-19	2.90315e-16	5.6944	319	[ABRAXAS2, ACACA, ACLY, ACOT7, ACTN1, ACTN2, ADA, AGO1, AGO2, AGO4, ALDH1A3, ANAPC4, APEH, ARHGDIB, ARHGEF10L, ARPC1A, ASNS, ATAD1, ATPAF2, B2M, BAG1, BAIAP2, BAIAP2L1, BAIAP2L2, BAK1, BCL2L14, BST2, CALR, CAMK2D, CAMK2G, CAPNS1, CASC3, CASP10, CASP4, CASP5, CASP6, CBR1, CBR3, CBS, CBSL, CCNT2, CD109, CD151, CDC42, CHD1L, CHEK1, CHMP4A, CHMP6, CIAO1, CKB, COMMD4, COPA, COPB2, CPOX, CRYM, CTPS2, C…
GO:0070013	intracellular organelle lumen	GO_CellularComponent-EBI-UniProt-GOA-ACAP-ARAP_13.05.2021_00h00	4.25706e-11	6.45371e-08	5.11226	296	[ABAT, ABCB8, ACACA, ACLY, ACOT7, ACOT9, ACP6, ACTN1, ACTN2, ADA, ADAR, AGA, AGO1, AGO2, ALG12, ANAPC4, APEH, ASAH1, ATAD3A, ATP5F1C, ATPAF2, B2M, BAIAP2, BAIAP2L1, BAIAP2L2, BCKDHB, C3, C4A, C6orf120, CALR, CAMK2D, CAMK2G, CANX, CASC3, CASP6, CBR3, CCNT2, CFD, CFP, CHD1L, CHEK1, CHI3L1, CIB1, CMPK2, CMTR1, COLGALT1, COX15, CP, CPOX, CPSF6, CRISP3, CRYM, CSTF3, CTSS, CTSV, CUL1, CUL4A, DAG1, DAXX…
GO:0070265	necrotic cell death	GO_BiologicalProcess-EBI-UniProt-GOA-ACAP-ARAP_13.05.2021_00h00	2.6655e-07	0.000383299	19.7183	14	[ASAH1, CAV1, CD14, FLOT1, MTCO2P12, NOL3, NPM3, PDCD6IP, RIPK1, SDCBP, TLR3, TMED7-TICAM2, TSPO, ZBP1]
GO:0098796	membrane protein complex	GO_CellularComponent-EBI-UniProt-GOA-ACAP-ARAP_13.05.2021_00h00	2.99075e-10	4.48314e-07	7.10145	98	[ABCB8, ABCD4, ABHD6, AP3D1, ATP5F1C, ATP6V0A2, ATP6V0A4, B2M, BAIAP2L2, BAK1, CALCRL, CALR, CASP10, CAV1, CD14, CDHR3, CHMP4A, CHMP6, CLCC1, CLDN4, COPA, COPB2, DAG1, DDOST, DUOX2, EMC1, EMC2, EMC3, EPS8, F3, FLOT1, GABRP, GNAI2, GRB2, GRPEL1, HLA-A, HLA-B, HLA-C, HLA-E, HLA-F, HLA-G, HM13, IKBKB, ITGA6, ITGAV, ITGB6, LRRC8A, LRRC8D, MCU, MCUB, MICU2, MTCO2P12, NCSTN, NDUFAF1, NDUFB10, NDUFB11, …
KEGG:04141	Protein processing in endoplasmic reticulum	KEGG_13.05.2021	8.70299e-08	0.000126802	13.4503	23	[BAG1, BAK1, CALR, CANX, CUL1, DDOST, DNAJB11, DNAJC3, ERLEC1, FBXO6, HSP90AB1, HSP90B1, HSPA5, MOGS, RPN1, RPN2, RRBP1, SEC63, SEL1L, SSR4, STT3A, STT3B, UGGT1]
GO:0140534	endoplasmic reticulum protein-containing complex	GO_CellularComponent-EBI-UniProt-GOA-ACAP-ARAP_13.05.2021_00h00	3.99343e-11	6.06602e-08	18.1159	25	[B2M, CALR, DDOST, EMC1, EMC2, EMC3, GET3, HLA-A, HM13, HSP90B1, HSPA5, PIGK, PIGS, RPN1, RPN2, SEC63, SEL1L, SPCS2, SPTLC1, SSR4, STT3A, STT3B, TAP1, TAP2, UGT1A4]
GO:0030176	integral component of endoplasmic reticulum membrane	GO_CellularComponent-EBI-UniProt-GOA-ACAP-ARAP_13.05.2021_00h00	3.85139e-12	5.88878e-09	17.2619	29	[B2M, CALR, CANX, DHCR7, ELOVL5, EMC1, EMC2, EMC3, ERGIC1, FKBP8, HLA-A, HLA-B, HLA-C, HLA-E, HLA-F, HLA-G, HM13, HSPA5, PIGK, PIGS, PRKD2, RRBP1, SGPL1, STING1, TAP1, TAP2, TAPT1, TMCO1, ZMPSTE24]
GO:0044248	cellular catabolic process	GO_BiologicalProcess-EBI-UniProt-GOA-ACAP-ARAP_13.05.2021_00h00	2.47503e-14	3.80907e-11	6.63162	164	[ABAT, ABCD4, ABHD6, ACOT7, ADA, ADAM9, AGO1, AGO2, AGO4, ANAPC4, ANPEP, ARRDC1, ASAH1, ATP6V0A2, BCKDHB, CAPNS1, CASC3, CAV1, CBR3, CBS, CBSL, CHMP4A, CHMP6, CNP, CPT1A, CRYM, CTSS, CTSV, CUL1, CUL4A, CYP2J2, DERA, DNAJC3, DNPEP, DTX3L, DUOX2, ECE1, EIF4G1, ENOSF1, ENPP2, ENPP3, ERAP1, ERAP2, ERLEC1, ETF1, EXOC8, EZR, FBXO6, FMO4, FYCO1, GDE1, GDPD1, GGT7, GIPC1, GK, GK3P, GLS, GLUD1, GLUD2, GOT…
GO:1901575	organic substance catabolic process	GO_BiologicalProcess-EBI-UniProt-GOA-ACAP-ARAP_13.05.2021_00h00	7.31846e-11	1.10436e-07	6.25	148	[ABAT, ABCD4, ABHD6, ACOT7, ADA, ADAM9, AGO1, AGO2, AGO4, ANAPC4, ANPEP, ARRDC1, ASAH1, BCKDHB, C4BPB, CASC3, CAV1, CBR3, CBS, CBSL, CHI3L1, CHMP4A, CHMP6, CNP, CPT1A, CRYM, CTSS, CTSV, CUL1, CUL4A, CYP51A1, DERA, DNAJC3, DTX3L, ECE1, EIF4G1, ENOSF1, ENPP2, ENPP3, ERAP1, ERAP2, ERLEC1, ETF1, EZR, FBXO6, FLNA, GDE1, GDPD1, GGT7, GIPC1, GK, GK3P, GLS, GLUD1, GLUD2, GOT2, GPD2, GSPT1, GSPT2, HADH, H…
GO:1901565	organonitrogen compound catabolic process	GO_BiologicalProcess-EBI-UniProt-GOA-ACAP-ARAP_13.05.2021_00h00	1.21869e-10	1.83413e-07	7.13287	102	[ABAT, ACOT7, ADA, ADAM9, ANAPC4, ANPEP, ARRDC1, ASAH1, BCKDHB, C4BPB, CAV1, CBS, CBSL, CHI3L1, CHMP4A, CHMP6, CRYM, CTSS, CTSV, CUL1, CUL4A, CYP51A1, DERA, DNAJC3, DTX3L, ECE1, ENOSF1, ENPP2, ERAP1, ERAP2, ERLEC1, EZR, FBXO6, FLNA, GGT7, GIPC1, GLS, GLUD1, GLUD2, GOT2, HM13, HPRT1, HSP90AB1, HSP90B1, HSPA5, IDO1, ISG15, MCCC1, NT5C2, NT5C3A, NUB1, OGDH, OTUD7A, OTUD7B, PAOX, PCYOX1, PDCD6IP, PGL…
GO:0048518	positive regulation of biological process	GO_BiologicalProcess-EBI-UniProt-GOA-ACAP-ARAP_13.05.2021_00h00	3.19656e-07	0.000458387	4.68345	307	[ABAT, ABCB7, ABHD6, ACACA, ACLY, ACSL3, ACTN1, ACTN2, ADA, ADAM9, ADAR, ADGRG1, AGO1, AGO2, AGO4, ALDH1A3, ANAPC4, AP3D1, ARHGEF10L, ARMC9, ARPC1A, ASNS, ATAD1, B2M, BAIAP2, BAIAP2L1, BAIAP2L2, BAK1, BST1, BST2, C2, C20orf27, C3, C4A, C4B, C4BPB, CALCRL, CALR, CAMK2D, CAPNS1, CASP10, CASP4, CASP5, CAV1, CBR1, CCNT2, CD14, CD47, CD55, CD70, CDC42, CFB, CFD, CFHR4, CFI, CFP, CHD1L, CHEK1, CHI3L1, …
GO:0032879	regulation of localization	GO_BiologicalProcess-EBI-UniProt-GOA-ACAP-ARAP_13.05.2021_00h00	2.67653e-08	3.92915e-05	5.61207	160	[ABAT, ABHD6, ACSL3, ACTN1, ACTN2, ADA, ADAM9, ADGRG1, AGO2, AP3D1, ARHGDIB, ATAD1, B2M, BAK1, BST1, BST2, C2, C3, C4A, C4B, CALR, CAMK2D, CAMK2G, CAV1, CD14, CD47, CDC42, CHMP6, CIB1, CLDN4, CPSF6, CPT1A, CTSS, CYP51A1, DAG1, DENND5B, DNAJC13, DPP4, DTX3L, DUOX2, ECM1, EFHB, EHD1, EHD4, ENPP2, EPHA2, ERLEC1, EZR, F3, FERMT1, FFAR4, FLNA, FLOT1, FYCO1, GAB2, GHSR, GIPC1, GLUD1, GNAI2, GRN, HADH, …
GO:0048584	positive regulation of response to stimulus	GO_BiologicalProcess-EBI-UniProt-GOA-ACAP-ARAP_13.05.2021_00h00	5.01578e-08	7.33808e-05	5.74666	142	[ADA, ADAM9, ADGRG1, ARMC9, ARPC1A, B2M, BAIAP2, BAK1, BST2, C2, C20orf27, C3, C4A, C4B, C4BPB, CALR, CASP10, CASP4, CAV1, CD14, CD47, CD55, CDC42, CFB, CFD, CFHR4, CFI, CFP, CHI3L1, CIB1, CLDN4, CSNK1G3, CUL1, CYFIP2, DAXX, DDX60, DHX58, DPEP2, DTX3L, DUOX2, ECM1, EIF2B1, EYA3, EZR, F3, FERMT1, FFAR4, FKBP8, FLNA, FLOT1, GAB2, GHSR, GIPC1, GNAI2, GRB2, GRN, HLA-A, HLA-B, HLA-E, HLA-F, HLA-G, HSP…
GO:0012501	programmed cell death	GO_BiologicalProcess-EBI-UniProt-GOA-ACAP-ARAP_13.05.2021_00h00	5.39513e-08	7.88768e-05	5.90372	130	[ACTN1, ACTN2, ADA, ADAR, AGO4, ALDH1A3, ASAH1, ASNS, ATAD3A, BAG1, BAK1, BCAP29, BCL2L14, C6orf120, CALR, CAMK2D, CAPNS1, CASP10, CASP4, CASP5, CASP6, CAV1, CD14, CD70, CDC42, CHEK1, CHI3L1, CIB1, CTSV, CUL1, CUL4A, CYFIP2, DAXX, DNAJA3, DNAJC3, DNPEP, EPHA2, EYA3, F3, FFAR4, FKBP8, FLNA, FLOT1, FSTL1, GHSR, GNAI2, GRN, HK2, HLA-G, HSP90AB1, HSP90B1, HSPA5, ICAM1, IDO1, IFI16, IFIT2, IFIT3, IKBK…
GO:0010941	regulation of cell death	GO_BiologicalProcess-EBI-UniProt-GOA-ACAP-ARAP_13.05.2021_00h00	5.10704e-07	0.000727753	6.01719	105	[ACTN1, ACTN2, ADA, ADAR, AGO4, ALDH1A3, ASAH1, ASNS, ATAD3A, BAG1, BAK1, BCL2L14, CALR, CAMK2D, CASP10, CASP4, CASP5, CASP6, CAV1, CDC42, CHMP4A, CIB1, DAXX, DNAJA3, DNAJC3, EIF4G1, EYA3, FFAR4, FKBP8, FLNA, FLOT1, FSTL1, GHSR, GNAI2, GRN, HLA-F, HLA-G, HP, HPR, HSP90AB1, HSP90B1, HSPA5, ICAM1, IDO1, IFIT2, IFIT3, IKBKB, ITGA6, ITGAV, KATNB1, KIFAP3, KPNA1, LGALS9, LMNA, LTF, MTCH2, MTCO2P12, NC…
GO:0006915	apoptotic process	GO_BiologicalProcess-EBI-UniProt-GOA-ACAP-ARAP_13.05.2021_00h00	2.18403e-07	0.000314937	5.88524	120	[ACTN1, ACTN2, ADA, ADAR, AGO4, ALDH1A3, ASNS, ATAD3A, BAG1, BAK1, BCAP29, BCL2L14, C6orf120, CALR, CAMK2D, CASP10, CASP4, CASP5, CASP6, CAV1, CD14, CD70, CDC42, CHEK1, CHI3L1, CIB1, CUL1, CUL4A, CYFIP2, DAXX, DNAJA3, DNAJC3, DNPEP, EPHA2, EYA3, F3, FFAR4, FKBP8, FLNA, FSTL1, GHSR, GNAI2, GRN, HK2, HLA-G, HSP90AB1, HSP90B1, HSPA5, ICAM1, IDO1, IFI16, IFIT2, IFIT3, IKBKB, ITGA6, ITGAV, KIFAP3, KPN…
GO:0006082	organic acid metabolic process	GO_BiologicalProcess-EBI-UniProt-GOA-ACAP-ARAP_13.05.2021_00h00	1.86094e-12	2.85097e-09	7.96915	93	[ABAT, ABCD4, ACACA, ACAD9, ACLY, ACOT7, ACSL3, ALDH1A3, ASAH1, ASNS, BCKDHB, C3, CAV1, CBR1, CBS, CBSL, CKB, CPT1A, CRYM, CTPS2, CYP2J2, DPEP2, ELOVL5, ENOSF1, FMO4, FOLR1, GARS1, GART, GFPT1, GFPT2, GGT7, GHSR, GLS, GLUD1, GLUD2, GNAI2, GNE, GNPAT, GOT2, HADH, HK2, HK3, IDH3A, IDH3B, IDH3G, IDO1, KARS1, MCCC1, ME1, ME2, ME3, NPC1, OGDH, PAM, PCCB, PDHX, PEPD, PFKFB2, PLIN5, PLOD3, PPA1, PSMA3, …
GO:0043436	oxoacid metabolic process	GO_BiologicalProcess-EBI-UniProt-GOA-ACAP-ARAP_13.05.2021_00h00	3.09222e-12	4.7311e-09	8.01056	91	[ABAT, ABCD4, ACACA, ACAD9, ACLY, ACOT7, ACSL3, ALDH1A3, ASAH1, ASNS, C3, CAV1, CBR1, CBS, CBSL, CKB, CPT1A, CRYM, CTPS2, CYP2J2, DPEP2, ELOVL5, ENOSF1, FOLR1, GARS1, GART, GFPT1, GFPT2, GGT7, GHSR, GLS, GLUD1, GLUD2, GNAI2, GNE, GNPAT, GOT2, HADH, HK2, HK3, IDH3A, IDH3B, IDH3G, IDO1, KARS1, MCCC1, ME1, ME2, ME3, NPC1, OGDH, PAM, PCCB, PDHX, PEPD, PFKFB2, PLIN5, PLOD3, PPA1, PSMA3, PSMB1, PSMB10,…
GO:0006520	cellular amino acid metabolic process	GO_BiologicalProcess-EBI-UniProt-GOA-ACAP-ARAP_13.05.2021_00h00	1.40319e-07	0.000203323	9.7035	36	[ABAT, ASNS, CBS, CBSL, CRYM, CTPS2, ENOSF1, GARS1, GART, GFPT1, GFPT2, GLS, GLUD1, GLUD2, GOT2, IDO1, KARS1, MCCC1, OGDH, PEPD, PLOD3, PPA1, PSMA3, PSMB1, PSMB10, PSMB3, PSMB8, PSMB9, PSMD6, PSMD7, PSME2, PYCR1, TARS1, TARS3, WARS1, YARS2]
GO:0051701	biological process involved in interaction with host	GO_BiologicalProcess-EBI-UniProt-GOA-ACAP-ARAP_13.05.2021_00h00	5.18448e-11	7.84412e-08	13.308	35	[ANPEP, B2M, CAV1, CD55, CDHR3, CHMP4A, CLDN6, CLDN9, DAG1, DPP4, EPHA2, GRB2, ICAM1, ITGAV, ITGB6, KPNA1, KPNA5, KPNA6, KPNB1, LGALS9, NPC1, PGLYRP1, PHB, PHB2, PLSCR1, PML, RIPK1, RNF213, SLC3A2, TFRC, TMPRSS2, TMPRSS4, TRIM21, TRIM22, VPS37B]
GO:0052126	movement in host environment	GO_BiologicalProcess-EBI-UniProt-GOA-ACAP-ARAP_13.05.2021_00h00	2.58033e-08	3.79567e-05	13	26	[ANPEP, CAV1, CD55, CDHR3, CHMP4A, CLDN6, CLDN9, DAG1, DPP4, EPHA2, GRB2, ICAM1, ITGAV, ITGB6, LGALS9, NPC1, PHB, PLSCR1, PML, SLC3A2, TFRC, TMPRSS2, TMPRSS4, TRIM21, TRIM22, VPS37B]
GO:0044409	entry into host	GO_BiologicalProcess-EBI-UniProt-GOA-ACAP-ARAP_13.05.2021_00h00	9.70302e-08	0.000140985	13.3721	23	[ANPEP, CAV1, CD55, CDHR3, CLDN6, CLDN9, DAG1, DPP4, EPHA2, GRB2, ICAM1, ITGAV, ITGB6, LGALS9, NPC1, PHB, PLSCR1, SLC3A2, TFRC, TMPRSS2, TMPRSS4, TRIM21, TRIM22]
GO:0012506	vesicle membrane	GO_CellularComponent-EBI-UniProt-GOA-ACAP-ARAP_13.05.2021_00h00	6.25501e-11	9.44507e-08	7.47812	94	[ABHD6, ANPEP, AP3D1, AQP5, ATP6V0A2, ATP6V0A4, B2M, BAIAP2L2, BST1, BST2, CALR, CAMK2D, CAMK2G, CAV1, CD109, CD14, CD47, CD55, CEACAM21, CHMP4A, CHMP6, COPA, COPB2, DDOST, DNAJC13, DTX3L, ECE1, EHD1, EHD4, EXOC3, F3, FFAR4, FOLR1, GDE1, GIPC1, GPRC5A, GPRC5C, GRB2, HLA-A, HLA-B, HLA-C, HLA-E, HLA-F, HLA-G, ITGAV, MGST1, MOSPD2, MYO1B, MYO1E, MYO5B, NCDN, NCSTN, NOL3, NPC1, OPTN, PACSIN2, PAM, PD…
GO:0030139	endocytic vesicle	GO_CellularComponent-EBI-UniProt-GOA-ACAP-ARAP_13.05.2021_00h00	5.80099e-10	8.66668e-07	11.1111	40	[ATP6V0A2, ATP6V0A4, B2M, CALR, CAMK2D, CAMK2G, CAV1, CDC42, CTSS, DPP4, EHD1, EHD4, F3, FFAR4, GIPC1, HLA-A, HLA-B, HLA-C, HLA-E, HLA-F, HLA-G, HP, HPR, HSP90B1, ITGAV, LTF, MYO1E, PGLYRP1, PICK1, RAB24, RAB35, RAB8A, SPARC, SYK, TAP1, TAP2, TCIRG1, TFRC, UNC93B1, VPS11]
GO:0030659	cytoplasmic vesicle membrane	GO_CellularComponent-EBI-UniProt-GOA-ACAP-ARAP_13.05.2021_00h00	1.60212e-09	2.39036e-06	8.08561	68	[ANPEP, AQP5, ATP6V0A2, ATP6V0A4, B2M, BAIAP2L2, BST1, BST2, CALR, CAMK2D, CAMK2G, CAV1, CD109, CD14, CD47, CD55, CEACAM21, CHMP4A, COPA, COPB2, DDOST, DNAJC13, EXOC3, F3, FOLR1, GDE1, GPRC5A, GPRC5C, HLA-A, HLA-B, HLA-C, HLA-E, HLA-F, HLA-G, ITGAV, MGST1, MOSPD2, MYO1E, MYO5B, NCSTN, PACSIN2, PAM, PDCD6, PICK1, PLAU, PRKD2, PSAP, PTPRJ, RAB24, RAB35, RAB8A, SIRPA, SIRPB1, SLCO4C1, SNX17, SPARC, …
GO:0045335	phagocytic vesicle	GO_CellularComponent-EBI-UniProt-GOA-ACAP-ARAP_13.05.2021_00h00	2.07579e-08	3.05972e-05	15.0685	22	[ATP6V0A2, ATP6V0A4, B2M, CALR, CDC42, CTSS, HLA-A, HLA-B, HLA-C, HLA-E, HLA-F, HLA-G, ITGAV, LTF, MYO1E, PGLYRP1, RAB8A, SYK, TAP1, TAP2, TCIRG1, UNC93B1]
GO:0001816	cytokine production	GO_BiologicalProcess-EBI-UniProt-GOA-ACAP-ARAP_13.05.2021_00h00	7.19019e-09	1.06702e-05	8.01001	64	[ADGRG1, B2M, BST2, C3, CD14, CD47, CD55, CHI3L1, DHX58, EPHA2, EZR, F3, FERMT1, FFAR4, FLOT1, GHSR, HERC5, HLA-A, HLA-B, HLA-E, HLA-F, HLA-G, HSP90AB1, IFI16, IFIH1, ISG15, ITGAV, ITGB6, KPNA6, LBP, LGALS9, LGALS9B, LGALS9C, LTF, MAP2K3, NFKB2, NMI, NPTN, OAS2, OTUD7B, PGLYRP1, PHB, PML, PNP, POLR1C, POLR3A, PRKD2, PTPRJ, RIPK1, RSAD2, S100A8, S100A9, SERPINB1, SIRPA, STAT1, STAT3, STING1, SYK, …
GO:0001817	regulation of cytokine production	GO_BiologicalProcess-EBI-UniProt-GOA-ACAP-ARAP_13.05.2021_00h00	1.14223e-08	1.68936e-05	7.95455	63	[B2M, BST2, C3, CD14, CD47, CD55, CHI3L1, DHX58, EPHA2, EZR, F3, FERMT1, FFAR4, FLOT1, GHSR, HERC5, HLA-A, HLA-B, HLA-E, HLA-F, HLA-G, HSP90AB1, IFI16, IFIH1, ISG15, ITGAV, ITGB6, KPNA6, LBP, LGALS9, LGALS9B, LGALS9C, LTF, MAP2K3, NFKB2, NMI, NPTN, OAS2, OTUD7B, PGLYRP1, PHB, PML, PNP, POLR1C, POLR3A, PRKD2, PTPRJ, RIPK1, RSAD2, S100A8, S100A9, SERPINB1, SIRPA, STAT1, STAT3, STING1, SYK, TLR3, TR…
GO:0032606	type I interferon production	GO_BiologicalProcess-EBI-UniProt-GOA-ACAP-ARAP_13.05.2021_00h00	3.19497e-08	4.68383e-05	15.3285	21	[CD14, DHX58, FLOT1, HERC5, IFI16, IFIH1, ISG15, NFKB2, NMI, OAS2, POLR1C, POLR3A, SIRPA, STAT1, STING1, SYK, TLR3, TRIM21, UBA7, UBE2L6, ZBP1]
GO:0032479	regulation of type I interferon production	GO_BiologicalProcess-EBI-UniProt-GOA-ACAP-ARAP_13.05.2021_00h00	3.19497e-08	4.68383e-05	15.3285	21	[CD14, DHX58, FLOT1, HERC5, IFI16, IFIH1, ISG15, NFKB2, NMI, OAS2, POLR1C, POLR3A, SIRPA, STAT1, STING1, SYK, TLR3, TRIM21, UBA7, UBE2L6, ZBP1]
GO:0005737	cytoplasm	GO_CellularComponent-EBI-UniProt-GOA-ACAP-ARAP_13.05.2021_00h00	0	3.76949e-43	5.09978	621	[ABAT, ABCB7, ABCB8, ABCD4, ABHD6, ABRAXAS2, ACACA, ACAD9, ACLY, ACOT7, ACOT9, ACP6, ACSL3, ACTN1, ACTN2, ADA, ADAR, AGA, AGO1, AGO2, AGO4, ALDH1A3, ALG12, ANAPC4, ANPEP, AP3D1, APEH, AQP5, ARHGDIB, ARHGEF10L, ARMC9, ARPC1A, ARRDC1, ASAH1, ASNS, ATAD1, ATAD3A, ATP5F1C, ATP6V0A2, ATP6V0A4, ATPAF2, B2M, B3GNT7, BAG1, BAIAP2, BAIAP2L1, BAIAP2L2, BAK1, BCAP29, BCKDHB, BCL2L14, BSPRY, BST1, BST2, BZW1…
GO:0043227	membrane-bounded organelle	GO_CellularComponent-EBI-UniProt-GOA-ACAP-ARAP_13.05.2021_00h00	1.34306e-30	2.12203e-27	4.6834	625	[ABAT, ABCB7, ABCB8, ABCD4, ABHD6, ABRAXAS2, ACACA, ACAD9, ACLY, ACOT7, ACOT9, ACP6, ACSL3, ACTN1, ACTN2, ADA, ADAM9, ADAR, ADGRG1, AGA, AGO1, AGO2, AGO4, ALDH1A3, ALG12, ANAPC4, ANPEP, AP3D1, APEH, AQP5, ARHGDIB, ARMC9, ARPC1A, ARRDC1, ASAH1, ATAD1, ATAD3A, ATP5F1C, ATP6V0A2, ATP6V0A4, ATPAF2, B2M, B3GNT7, BAG1, BAIAP2, BAIAP2L1, BAIAP2L2, BAK1, BCAP29, BCKDHB, BPIFB1, BST1, BST2, C2, C3, C4A, C…
GO:0043229	intracellular organelle	GO_CellularComponent-EBI-UniProt-GOA-ACAP-ARAP_13.05.2021_00h00	2.16353e-19	3.37078e-16	4.48353	599	[ABAT, ABCB7, ABCB8, ABCD4, ABHD6, ABRAXAS2, ACACA, ACAD9, ACLY, ACOT7, ACOT9, ACP6, ACSL3, ACTN1, ACTN2, ADA, ADAR, AGA, AGO1, AGO2, AGO4, ALG12, ANAPC4, ANPEP, AP3D1, APEH, AQP5, ARHGDIB, ARMC9, ARPC1A, ASAH1, ATAD1, ATAD3A, ATP5F1C, ATP6V0A2, ATP6V0A4, ATPAF2, B2M, B3GNT7, BAG1, BAIAP2, BAIAP2L1, BAIAP2L2, BAK1, BCAP29, BCKDHB, BCL2L14, BST1, BST2, C3, C4A, C6orf120, CALCRL, CALR, CAMK2D, CAMK…
GO:0043231	intracellular membrane-bounded organelle	GO_CellularComponent-EBI-UniProt-GOA-ACAP-ARAP_13.05.2021_00h00	4.16114e-22	6.51635e-19	4.6574	573	[ABAT, ABCB7, ABCB8, ABCD4, ABHD6, ABRAXAS2, ACACA, ACAD9, ACLY, ACOT7, ACOT9, ACP6, ACSL3, ACTN1, ACTN2, ADA, ADAR, AGA, AGO1, AGO2, AGO4, ALG12, ANAPC4, ANPEP, AP3D1, APEH, AQP5, ARHGDIB, ARPC1A, ASAH1, ATAD1, ATAD3A, ATP5F1C, ATP6V0A2, ATP6V0A4, ATPAF2, B2M, B3GNT7, BAG1, BAIAP2, BAIAP2L1, BAIAP2L2, BAK1, BCAP29, BCKDHB, BST1, BST2, C3, C4A, C6orf120, CALCRL, CALR, CAMK2D, CAMK2G, CANX, CASC3,…
GO:1901564	organonitrogen compound metabolic process	GO_BiologicalProcess-EBI-UniProt-GOA-ACAP-ARAP_13.05.2021_00h00	8.50013e-20	1.32602e-16	5.38561	375	[ABAT, ABCB7, ABCD4, ABRAXAS2, ACACA, ACLY, ACOT7, ACOT9, ACSL3, ADA, ADAM9, ADAR, AGA, AGO1, AGO2, AGO4, ALG12, ANAPC4, ANPEP, APEH, ARRDC1, ASAH1, ASNS, ATP5F1C, B2M, B3GNT7, BAK1, BCKDHB, BSPRY, BST1, BST2, C2, C3, C4A, C4B, C4BPB, CALR, CAMK2D, CAMK2G, CAPNS1, CASC3, CASP10, CASP4, CASP5, CASP6, CAV1, CBS, CBSL, CCNT2, CD109, CDC42, CFB, CFD, CFI, CHEK1, CHI3L1, CHMP4A, CHMP6, CHST4, CIAO1, C…
GO:0019538	protein metabolic process	GO_BiologicalProcess-EBI-UniProt-GOA-ACAP-ARAP_13.05.2021_00h00	5.24995e-10	7.84868e-07	5.00168	297	[ABRAXAS2, ACACA, ADAM9, ADAR, AGA, AGO1, AGO2, AGO4, ALG12, ANAPC4, ANPEP, APEH, ARRDC1, B2M, B3GNT7, BAK1, BSPRY, BST1, BST2, C2, C3, C4A, C4B, C4BPB, CALR, CAMK2D, CAMK2G, CAPNS1, CASC3, CASP10, CASP4, CASP5, CASP6, CAV1, CCNT2, CD109, CDC42, CFB, CFD, CFI, CHEK1, CHI3L1, CHMP4A, CHMP6, CHST4, CIAO1, CIB1, CLCA4, CLDN4, CP, CPD, CPOX, CSNK1G3, CTSS, CTSV, CUL1, CUL4A, CYFIP2, CYP51A1, DAG1, DA…
GO:0006508	proteolysis	GO_BiologicalProcess-EBI-UniProt-GOA-ACAP-ARAP_13.05.2021_00h00	2.54092e-16	3.9308e-13	7.42678	142	[ABRAXAS2, ADAM9, AGA, ANAPC4, ANPEP, APEH, ARRDC1, BAK1, BST2, C2, C3, C4A, C4B, CAPNS1, CASP10, CASP4, CASP5, CASP6, CAV1, CD109, CFB, CFD, CFI, CHMP4A, CLCA4, CLDN4, CPD, CPOX, CTSS, CTSV, CUL1, CUL4A, CYFIP2, DAG1, DNAJC3, DNPEP, DPEP2, DPEP3, DPP4, DPP7, DTX3L, ECE1, ECM1, ERAP1, ERAP2, ERLEC1, ERMP1, F3, FAM111A, FBXO6, GARS1, GGH, GGT7, GIPC1, GLG1, GRN, HM13, HP, HPR, HSP90AB1, HSP90B1, H…
GO:0008233	peptidase activity	GO_BiologicalProcess-EBI-UniProt-GOA-ACAP-ARAP_13.05.2021_00h00	7.71395e-17	1.19489e-13	8.9539	101	[ADAM9, AGA, ANPEP, APEH, BAK1, BST2, C2, C3, C4A, C4B, CAPNS1, CASP10, CASP4, CASP5, CASP6, CAV1, CD109, CFB, CFD, CFI, CLCA4, CLDN4, CPD, CPOX, CTSS, CTSV, CYFIP2, DNPEP, DPEP2, DPEP3, DPP4, DPP7, ECE1, ECM1, ERAP1, ERAP2, ERMP1, F3, FAM111A, GGH, GGT7, GRN, HM13, HP, HPR, IFI16, LGALS9, LTF, MMP13, MMP7, NCLN, NCSTN, NOL3, OTUD7A, OTUD7B, PDCD6, PEPD, PGPEP1, PI3, PIGK, PLAT, PLAU, PML, PPP3CA…
GO:0052547	regulation of peptidase activity	GO_BiologicalProcess-EBI-UniProt-GOA-ACAP-ARAP_13.05.2021_00h00	7.42869e-08	0.00010831	8.92495	44	[BAK1, BST2, C3, C4A, C4B, CASP10, CASP4, CASP5, CAV1, CD109, CLDN4, CYFIP2, DNPEP, ECM1, F3, GRN, IFI16, LGALS9, LTF, NCSTN, NOL3, PDCD6, PI3, PML, PPP3CA, PRSS22, PSMA3, PSMB8, PSMB9, PSME2, RIPK1, S100A8, S100A9, SERPINB1, SERPINB2, SERPINB8, SERPING1, SLPI, STAT3, SYK, TIMP1, VDAC2, WFDC2, XDH]
GO:0006793	phosphorus metabolic process	GO_BiologicalProcess-EBI-UniProt-GOA-ACAP-ARAP_13.05.2021_00h00	1.2193e-07	0.000176921	5.43974	167	[ABHD6, ACACA, ACLY, ACOT7, ACOT9, ACP6, ACSL3, ADA, ADAM9, ADAR, ATP5F1C, BAK1, BST1, C3, CAMK2D, CAMK2G, CAV1, CCNT2, CD109, CDC42, CHEK1, CHI3L1, CHMP6, CIB1, CKB, CMPK2, CNP, CSNK1G3, CTPS2, DAG1, DAXX, DDR1, DERA, DNAJC3, EFEMP1, EHD4, EIF4G1, ELOVL5, ENPP2, ENPP3, EPHA2, EPS8L1, EYA3, F3, FGGY, FKBP8, FLOT1, FRK, GARS1, GART, GDE1, GDPD1, GFPT1, GFPT2, GK, GK3P, GMPR, GNAI2, GNE, GNPAT, GPD…
GO:1901135	carbohydrate derivative metabolic process	GO_BiologicalProcess-EBI-UniProt-GOA-ACAP-ARAP_13.05.2021_00h00	7.79154e-11	1.17496e-07	7.4736	92	[ABHD6, ACACA, ACLY, ACOT7, ACOT9, ACP6, ACSL3, ADA, AGA, AGO2, ALG12, ASAH1, ATP5F1C, B3GNT7, CHI3L1, CHST4, CMPK2, CTPS2, DDOST, DERA, ELOVL5, EOGT, EPHA2, ERP44, FBXO6, GALNT12, GALNT14, GALNT2, GALNT3, GALNT6, GALNT7, GART, GFPT1, GFPT2, GK, GK3P, GNE, GPD2, HK2, HK3, HMGCS1, HPRT1, MAN2A1, MAN2A2, MOGS, MTCO2P12, MUC13, MUC4, MUC5AC, MVK, NCSTN, NME3, NPC1, NT5C2, NT5C3A, OGDH, PANK4, PDCD6,…
GO:0019637	organophosphate metabolic process	GO_BiologicalProcess-EBI-UniProt-GOA-ACAP-ARAP_13.05.2021_00h00	1.6367e-07	0.000236503	6.81818	78	[ABHD6, ACACA, ACLY, ACOT7, ACOT9, ACP6, ACSL3, ADA, ATP5F1C, CDC42, CKB, CMPK2, CNP, CTPS2, DERA, ELOVL5, ENPP2, ENPP3, EPHA2, GARS1, GART, GDE1, GDPD1, GFPT1, GFPT2, GK, GK3P, GMPR, GNPAT, GPD2, GPHN, HK2, HK3, HMGCS1, HPRT1, IDI1, IDO1, ISYNA1, KARS1, LCLAT1, LPCAT3, ME1, MTCO2P12, MVK, NME3, NT5C2, NT5C3A, OGDH, PANK4, PARP9, PDHX, PFKFB2, PGPEP1, PHB2, PI4KA, PIGK, PIGS, PIP4K2A, PLCH1, PLPP…
GO:0006796	phosphate-containing compound metabolic process	GO_BiologicalProcess-EBI-UniProt-GOA-ACAP-ARAP_13.05.2021_00h00	1.94911e-07	0.000281256	5.42228	165	[ABHD6, ACACA, ACLY, ACOT7, ACOT9, ACP6, ACSL3, ADA, ADAM9, ADAR, ATP5F1C, BAK1, BST1, C3, CAMK2D, CAMK2G, CAV1, CCNT2, CD109, CDC42, CHEK1, CHI3L1, CHMP6, CIB1, CKB, CMPK2, CNP, CSNK1G3, CTPS2, DAG1, DAXX, DDR1, DERA, DNAJC3, EFEMP1, EHD4, EIF4G1, ELOVL5, ENPP2, ENPP3, EPHA2, EPS8L1, EYA3, F3, FGGY, FKBP8, FLOT1, FRK, GARS1, GART, GDE1, GDPD1, GFPT1, GFPT2, GK, GK3P, GMPR, GNAI2, GNE, GNPAT, GPD…
GO:0055086	nucleobase-containing small molecule metabolic process	GO_BiologicalProcess-EBI-UniProt-GOA-ACAP-ARAP_13.05.2021_00h00	2.28796e-07	0.000329467	7.85185	53	[ACACA, ACLY, ACOT7, ACOT9, ACSL3, ADA, ATP5F1C, CMPK2, CNP, CTPS2, DERA, ELOVL5, ENPP3, EPHA2, GARS1, GART, GFPT1, GFPT2, GMPR, GNE, HK2, HK3, HMGCS1, HPRT1, IDO1, KARS1, ME1, MTCO2P12, MVK, NME3, NT5C2, NT5C3A, OGDH, PANK4, PARP9, PDHX, PFKFB2, PNP, PRTFDC1, RRM1, SLC35A3, SLC5A8, SLPI, STAT3, SUCLA2, SULT1E1, TIGAR, TSPO, TXNRD1, UGGT1, UPP1, UPP2, XDH]
GO:0048518	positive regulation of biological process	GO_BiologicalProcess-EBI-UniProt-GOA-ACAP-ARAP_13.05.2021_00h00	3.19656e-07	0.000458387	4.68345	307	[ABAT, ABCB7, ABHD6, ACACA, ACLY, ACSL3, ACTN1, ACTN2, ADA, ADAM9, ADAR, ADGRG1, AGO1, AGO2, AGO4, ALDH1A3, ANAPC4, AP3D1, ARHGEF10L, ARMC9, ARPC1A, ASNS, ATAD1, B2M, BAIAP2, BAIAP2L1, BAIAP2L2, BAK1, BST1, BST2, C2, C20orf27, C3, C4A, C4B, C4BPB, CALCRL, CALR, CAMK2D, CAPNS1, CASP10, CASP4, CASP5, CAV1, CBR1, CCNT2, CD14, CD47, CD55, CD70, CDC42, CFB, CFD, CFHR4, CFI, CFP, CHD1L, CHEK1, CHI3L1, …
GO:0032879	regulation of localization	GO_BiologicalProcess-EBI-UniProt-GOA-ACAP-ARAP_13.05.2021_00h00	2.67653e-08	3.92915e-05	5.61207	160	[ABAT, ABHD6, ACSL3, ACTN1, ACTN2, ADA, ADAM9, ADGRG1, AGO2, AP3D1, ARHGDIB, ATAD1, B2M, BAK1, BST1, BST2, C2, C3, C4A, C4B, CALR, CAMK2D, CAMK2G, CAV1, CD14, CD47, CDC42, CHMP6, CIB1, CLDN4, CPSF6, CPT1A, CTSS, CYP51A1, DAG1, DENND5B, DNAJC13, DPP4, DTX3L, DUOX2, ECM1, EFHB, EHD1, EHD4, ENPP2, EPHA2, ERLEC1, EZR, F3, FERMT1, FFAR4, FLNA, FLOT1, FYCO1, GAB2, GHSR, GIPC1, GLUD1, GNAI2, GRN, HADH, …
GO:0008104	protein localization	GO_BiologicalProcess-EBI-UniProt-GOA-ACAP-ARAP_13.05.2021_00h00	4.04596e-09	6.0123e-06	5.79446	159	[ABAT, ACSL3, ACTN2, ADAM9, AP3D1, ARRDC1, ATAD1, ATP6V0A2, ATP6V0A4, BAIAP2, BCAP29, CALCRL, CALR, CAMK2G, CANX, CAV1, CDC42, CHMP4A, CHMP6, CIB1, COPA, COPB2, CPT1A, CYP51A1, DAG1, DNAJA3, DNAJC13, DPP4, DTX3L, EHD1, EHD4, EMC1, EMC2, EMC3, EPHA2, ERLEC1, EXOC3, EXOC8, EZR, F3, FERMT1, FLNA, FLOT1, FYCO1, GBP2, GET3, GHSR, GIPC1, GLUD1, GNAI2, GNPAT, GPHN, GRPEL1, HADH, HEATR3, HK2, HM13, HSP90…
GO:0051049	regulation of transport	GO_BiologicalProcess-EBI-UniProt-GOA-ACAP-ARAP_13.05.2021_00h00	1.78467e-07	0.000257707	6.04425	112	[ABAT, ACSL3, ACTN2, ADA, ADAM9, ATAD1, B2M, BAK1, BST2, C2, C3, C4A, C4B, CALR, CAMK2D, CAMK2G, CAV1, CD14, CD47, CDC42, CHMP6, CIB1, CPSF6, CPT1A, CTSS, CYP51A1, DENND5B, DNAJC13, DPP4, EFHB, EHD1, EHD4, ERLEC1, EZR, F3, FERMT1, FFAR4, FLNA, FLOT1, FYCO1, GAB2, GHSR, GIPC1, GLUD1, GNAI2, HADH, HK2, HLA-F, HSP90AB1, ICAM1, IPO5, ITGAV, LGALS9, LPCAT3, LRRC8A, MAP2K1, MCU, MX2, MYH10, MYO1E, NCS1…
GO:0051050	positive regulation of transport	GO_BiologicalProcess-EBI-UniProt-GOA-ACAP-ARAP_13.05.2021_00h00	2.60167e-07	0.00037438	7.00701	70	[ABAT, ACSL3, ACTN2, ADAM9, ATAD1, B2M, BAK1, C2, C3, C4A, C4B, CALR, CAV1, CD14, CD47, CDC42, CIB1, CPSF6, CTSS, DENND5B, EHD1, EZR, F3, FFAR4, FLNA, FLOT1, FYCO1, GAB2, GLUD1, GNAI2, HLA-F, HSP90AB1, IPO5, LPCAT3, LRRC8A, MCU, MYH10, MYO1E, NCS1, NIPSNAP2, NOL3, P2RX4, PDCD6IP, PDHX, PFKFB2, PICK1, PPP3CA, PPP3CB, PRKCI, PRKD2, PRSS8, PTPRJ, RBP4, S100A8, SDCBP, SIRPA, SIRPB1, SIRPG, SLC9A1, ST…
GO:0016043	cellular component organization	GO_BiologicalProcess-EBI-UniProt-GOA-ACAP-ARAP_13.05.2021_00h00	2.81592e-07	0.000404366	4.65455	320	[ABCB7, ABCD4, ABRAXAS2, ACACA, ACAD9, ACSL3, ACTN1, ACTN2, ADAM9, ADGRF1, AGO1, AGO2, AGO4, ALDH1A3, ANAPC4, AP3D1, APEH, AQP5, ARHGDIB, ARHGEF10L, ARMC9, ARPC1A, ATAD1, ATAD3A, ATP5F1C, ATP6V0A2, ATP6V0A4, ATPAF2, B2M, BAIAP2, BAIAP2L1, BAIAP2L2, BAK1, BST1, BST2, C3, CALR, CAMK2D, CAMK2G, CAPNS1, CAV1, CD14, CD151, CD47, CDC42, CDHR3, CHD1L, CHD2, CHEK1, CHMP4A, CHMP6, CIAO1, CIB1, CLDN4, CLDN…
GO:0044085	cellular component biogenesis	GO_BiologicalProcess-EBI-UniProt-GOA-ACAP-ARAP_13.05.2021_00h00	9.4405e-11	1.42174e-07	5.64607	201	[ABCB7, ABRAXAS2, ACACA, ACAD9, ACSL3, ACTN1, ACTN2, ADGRF1, AGO1, AGO2, AGO4, ALDH1A3, AQP5, ARHGEF10L, ARMC9, ARPC1A, ARRDC1, ATPAF2, B2M, BAIAP2, BAIAP2L1, BAIAP2L2, BAK1, CALR, CAV1, CD151, CD47, CDC42, CDHR3, CHD1L, CHMP4A, CHMP6, CIAO1, CLDN4, CLDN6, CLDN9, COX15, CPSF6, CUL1, CUL4A, CYFIP2, DAG1, DAXX, DPEP2, DPEP3, ECSIT, EHD1, EHD4, EIF4G1, EPHA2, EPS8, EPS8L1, EPS8L2, EXOC3, EXOC8, EZR,…
GO:0022607	cellular component assembly	GO_BiologicalProcess-EBI-UniProt-GOA-ACAP-ARAP_13.05.2021_00h00	4.48212e-11	6.78593e-08	5.78915	190	[ABCB7, ABRAXAS2, ACACA, ACAD9, ACSL3, ACTN1, ACTN2, ADGRF1, AGO1, AGO2, AGO4, ALDH1A3, AQP5, ARHGEF10L, ARMC9, ARPC1A, ATPAF2, B2M, BAIAP2, BAIAP2L1, BAIAP2L2, BAK1, CALR, CAV1, CD151, CD47, CDC42, CDHR3, CHD1L, CHMP4A, CHMP6, CIAO1, CLDN4, CLDN6, CLDN9, COX15, CPSF6, CUL1, CUL4A, CYFIP2, DAG1, DAXX, DPEP2, DPEP3, ECSIT, EHD1, EHD4, EIF4G1, EPHA2, EPS8, EPS8L1, EPS8L2, EXOC3, EXOC8, EZR, FERMT1,…
GO:0043933	protein-containing complex subunit organization	GO_BiologicalProcess-EBI-UniProt-GOA-ACAP-ARAP_13.05.2021_00h00	1.10213e-08	1.63115e-05	6.07345	129	[ACACA, ACAD9, ACSL3, ACTN2, AGO1, AGO2, AGO4, ALDH1A3, APEH, AQP5, ARPC1A, ATPAF2, B2M, BAIAP2, BAIAP2L1, BAIAP2L2, BAK1, CALR, CAV1, CDC42, CHD1L, CHMP4A, CHMP6, CIB1, COX15, CPSF6, CUL1, CUL4A, CYFIP2, DAXX, DPEP2, ECSIT, EHD1, EHD4, EIF4G1, EPS8, ETF1, FERMT1, FOLR1, FSCN1, FYCO1, GARS1, GEMIN4, GLS, GRB2, GSPT1, GSPT2, HLA-G, HPRT1, HSP90AB1, HSPA5, ICAM1, IPO4, KATNB1, KIFAP3, KLC1, LAMC1, …
GO:0065003	protein-containing complex assembly	GO_BiologicalProcess-EBI-UniProt-GOA-ACAP-ARAP_13.05.2021_00h00	4.31983e-09	6.41495e-06	6.38415	116	[ACACA, ACAD9, ACSL3, AGO1, AGO2, AGO4, ALDH1A3, AQP5, ARPC1A, ATPAF2, B2M, BAIAP2, BAIAP2L1, BAIAP2L2, BAK1, CALR, CDC42, CHD1L, CHMP4A, CHMP6, COX15, CPSF6, CUL1, CUL4A, CYFIP2, DAXX, DPEP2, ECSIT, EHD1, EHD4, EIF4G1, EPS8, FERMT1, FOLR1, FSCN1, GARS1, GEMIN4, GLS, GRB2, HLA-G, HPRT1, HSP90AB1, HSPA5, ICAM1, IPO4, KIFAP3, LAMC1, LPCAT3, LRRC8A, LRRC8D, MCM3, MCM4, MCM5, MCM6, MCM7, MCU, MX1, MX…
GO:0005615	extracellular space	GO_CellularComponent-EBI-UniProt-GOA-ACAP-ARAP_13.05.2021_00h00	1.23667e-31	1.95641e-28	7.34227	263	[ACLY, ACOT7, ACTN1, ACTN2, ADA, ADAM9, ADGRG1, AGA, AGO2, ALDH1A3, ANPEP, APEH, AQP5, ARHGDIB, ARMC9, ARPC1A, ARRDC1, ASAH1, ATP6V0A4, B2M, BAIAP2, BAIAP2L1, BPIFB1, BST1, BST2, C2, C3, C4A, C4B, C4BPB, CALR, CANX, CAPNS1, CBR1, CBR3, CD109, CD14, CD47, CD55, CD70, CD82, CDC42, CFB, CFD, CFI, CFP, CHEK1, CHI3L1, CHMP4A, CHMP6, CIB1, CKB, CNP, COPA, CP, CPD, CPOX, CRELD2, CRISP3, CRYM, CTSS, CTSV…
GO:0006810	transport	GO_BiologicalProcess-EBI-UniProt-GOA-ACAP-ARAP_13.05.2021_00h00	3.17891e-25	5.0195e-22	6.08033	327	[ABAT, ABCB7, ABCB8, ABCC3, ABCD4, ACACA, ACLY, ACSL3, ACTN1, ACTN2, ADA, ADAM9, AGA, ANPEP, AP3D1, APEH, AQP5, ARPC1A, ARRDC1, ASAH1, ATAD1, ATP5F1C, ATP6V0A2, ATP6V0A4, B2M, BAIAP2, BAK1, BCAP29, BSPRY, BST1, BST2, C2, C3, C4A, C4B, C4BPB, C6orf120, CALCRL, CALR, CAMK2D, CAMK2G, CANX, CASC3, CAV1, CD109, CD14, CD47, CD55, CDC42, CEACAM21, CFD, CFHR4, CFI, CFP, CHI3L1, CHMP4A, CHMP6, CIB1, CLCA4…
GO:0016192	vesicle-mediated transport	GO_BiologicalProcess-EBI-UniProt-GOA-ACAP-ARAP_13.05.2021_00h00	6.40367e-23	1.00538e-19	7.74556	179	[ACLY, ACSL3, ACTN1, ACTN2, AGA, ANPEP, AP3D1, APEH, ARPC1A, ASAH1, ATAD1, B2M, BAIAP2, BCAP29, BST1, BST2, C2, C3, C4A, C4B, C4BPB, C6orf120, CALCRL, CALR, CANX, CAV1, CD109, CD14, CD47, CD55, CDC42, CEACAM21, CFD, CFI, CFP, CHI3L1, CHMP4A, CHMP6, COPA, COPB2, CRISP3, CSNK1G3, CTSS, CYFIP2, DDOST, DERA, DNAJC13, DNAJC3, DPP7, DTX3L, ECM1, EHD1, EHD4, ENDOD1, ENPP2, ERGIC1, ERP44, EXOC3, EXOC8, E…
GO:0031982	vesicle	GO_CellularComponent-EBI-UniProt-GOA-ACAP-ARAP_13.05.2021_00h00	5.6377e-41	8.92447e-38	7.47776	311	[ABHD6, ACLY, ACOT7, ACTN1, ACTN2, ADA, ADAM9, ADGRG1, AGA, AGO2, ALDH1A3, ANPEP, AP3D1, APEH, AQP5, ARHGDIB, ARMC9, ARPC1A, ARRDC1, ASAH1, ATP6V0A2, ATP6V0A4, B2M, BAIAP2, BAIAP2L1, BAIAP2L2, BPIFB1, BST1, BST2, C2, C3, C4A, C4B, C6orf120, CALCRL, CALR, CAMK2D, CAMK2G, CANX, CAPNS1, CAV1, CBR1, CD109, CD14, CD47, CD55, CD70, CD82, CDC42, CEACAM21, CFB, CFD, CFI, CFP, CHI3L1, CHMP4A, CHMP6, CIB1,…
GO:0031410	cytoplasmic vesicle	GO_CellularComponent-EBI-UniProt-GOA-ACAP-ARAP_13.05.2021_00h00	1.11509e-24	1.75961e-21	7.66224	196	[ABHD6, ACLY, ACTN1, ACTN2, ADA, AGA, ANPEP, AP3D1, APEH, AQP5, ARHGDIB, ASAH1, ATP6V0A2, ATP6V0A4, B2M, BAIAP2, BAIAP2L2, BST1, BST2, C3, C6orf120, CALCRL, CALR, CAMK2D, CAMK2G, CANX, CAV1, CD109, CD14, CD47, CD55, CDC42, CEACAM21, CFD, CFP, CHI3L1, CHMP4A, CHMP6, CNP, COPA, COPB2, CRISP3, CTSS, CTSV, DDOST, DERA, DNAJC13, DNAJC3, DPEP3, DPP4, DPP7, DTX3L, ECE1, ECM1, EHD1, EHD4, ERGIC1, ERP44, …
GO:1903561	extracellular vesicle	GO_CellularComponent-EBI-UniProt-GOA-ACAP-ARAP_13.05.2021_00h00	0	9.10844e-44	9.86957	227	[ACLY, ACOT7, ACTN1, ACTN2, ADAM9, ADGRG1, AGO2, ALDH1A3, ANPEP, APEH, AQP5, ARHGDIB, ARMC9, ARPC1A, ARRDC1, ASAH1, ATP6V0A4, B2M, BAIAP2, BAIAP2L1, BPIFB1, BST1, BST2, C2, C3, C4A, C4B, CALR, CANX, CAPNS1, CBR1, CD14, CD47, CD55, CD70, CD82, CDC42, CFB, CFD, CFI, CHI3L1, CHMP4A, CHMP6, CIB1, CKB, CNP, COPA, CP, CPD, CRYM, CYFIP2, CYP2J2, DAG1, DDR1, DNAJC13, DNAJC3, DPP4, DPP7, DUOX2, ECE1, ECM1…
GO:0031984	organelle subcompartment	GO_CellularComponent-EBI-UniProt-GOA-ACAP-ARAP_13.05.2021_00h00	4.52639e-16	6.9978e-13	7.47158	138	[ABCD4, ACSL3, ALG12, AP3D1, B2M, B3GNT7, BCAP29, CALR, CAMK2D, CAMK2G, CANX, CASP4, CAV1, CD55, CDC42, CHST4, CLCC1, COPA, COPB2, CYP2J2, CYP51A1, DDOST, DHCR7, ELOVL5, EMC1, EMC2, EMC3, ERAP1, ERAP2, ERGIC1, ERMP1, ERP44, FKBP8, FLNA, FMO4, FOLR1, GALNT12, GALNT14, GALNT2, GALNT3, GALNT6, GALNT7, GBP2, GDPD1, GLG1, GRN, HLA-A, HLA-B, HLA-C, HLA-E, HLA-F, HLA-G, HM13, HSD17B7, HSP90B1, HSPA5, KP…
GO:0042175	nuclear outer membrane-endoplasmic reticulum membrane network	GO_CellularComponent-EBI-UniProt-GOA-ACAP-ARAP_13.05.2021_00h00	7.65368e-17	1.18632e-13	8.7171	106	[ABCD4, ACSL3, ALG12, B2M, BCAP29, CALR, CAMK2D, CAMK2G, CANX, CASP4, CAV1, CDC42, CLCC1, COPA, COPB2, CYP2J2, CYP51A1, DDOST, DHCR7, ELOVL5, EMC1, EMC2, EMC3, ERAP1, ERAP2, ERGIC1, ERMP1, ERP44, FKBP8, FMO4, FOLR1, GALNT2, GDPD1, HLA-A, HLA-B, HLA-C, HLA-E, HLA-F, HLA-G, HM13, HSD17B7, HSP90B1, HSPA5, LCLAT1, LMAN2L, LMF2, LPCAT3, LRRC8D, LSS, MGST1, MOGS, MOSPD2, MX1, NCLN, NOMO1, NOMO2, NOMO3,…
GO:0031090	organelle membrane	GO_CellularComponent-EBI-UniProt-GOA-ACAP-ARAP_13.05.2021_00h00	3.28953e-31	5.20074e-28	7.16355	272	[ABCB7, ABCB8, ABCD4, ABHD6, ACAD9, ACSL3, ALG12, ANPEP, AP3D1, APEH, AQP5, ATAD1, ATAD3A, ATP5F1C, ATP6V0A2, ATP6V0A4, B2M, B3GNT7, BAIAP2L2, BAK1, BCAP29, BST1, BST2, CALR, CAMK2D, CAMK2G, CANX, CASC3, CASP4, CAV1, CD109, CD14, CD47, CD55, CDC42, CEACAM21, CHMP4A, CHMP6, CHST4, CISD1, CLCC1, CNP, COPA, COPB2, COX15, CP, CPT1A, CYB5B, CYP2J2, CYP51A1, DDOST, DHCR7, DNAJC13, DPP4, DTX3L, ECE1, EC…
GO:0005783	endoplasmic reticulum	GO_CellularComponent-EBI-UniProt-GOA-ACAP-ARAP_13.05.2021_00h00	2.23587e-23	3.51702e-20	8.07068	169	[ABCD4, ACSL3, AGA, ALG12, AQP5, ASAH1, B2M, BAIAP2, BAK1, BCAP29, C3, C4A, CALCRL, CALR, CAMK2D, CAMK2G, CANX, CASP4, CAV1, CDC42, CFP, CHI3L1, CIB1, CLCC1, COLGALT1, COPA, COPB2, CP, CRELD2, CYP2J2, CYP51A1, DAG1, DDOST, DHCR7, DNAJB11, DNAJC3, DUOX2, EHD4, ELOVL5, EMC1, EMC2, EMC3, EOGT, ERAP1, ERAP2, ERGIC1, ERLEC1, ERMP1, ERP44, F3, FBXO6, FKBP8, FMO4, FOLR1, FSTL1, GALNT2, GDPD1, GET3, GLUD…
GO:0098588	bounding membrane of organelle	GO_CellularComponent-EBI-UniProt-GOA-ACAP-ARAP_13.05.2021_00h00	3.99602e-14	6.14588e-11	6.77817	154	[ABCD4, ABHD6, ACSL3, ANPEP, AP3D1, ATAD1, ATP6V0A2, ATP6V0A4, B2M, B3GNT7, BAK1, BST1, BST2, CALR, CAMK2D, CAMK2G, CAV1, CD109, CD14, CD47, CD55, CDC42, CEACAM21, CHMP4A, CHMP6, CHST4, CISD1, CLCC1, CNP, COPA, COPB2, CP, CPT1A, CYB5B, DDOST, DHCR7, DNAJC13, DPP4, DTX3L, ECE1, EHD1, EHD4, ERGIC1, EXOC3, F3, FFAR4, FLOT1, FOLR1, GALNT12, GALNT14, GALNT2, GALNT3, GALNT6, GALNT7, GBP2, GK, GK3P, GLG…
GO:0098827	endoplasmic reticulum subcompartment	GO_CellularComponent-EBI-UniProt-GOA-ACAP-ARAP_13.05.2021_00h00	3.29703e-17	5.11698e-14	8.84808	106	[ABCD4, ACSL3, ALG12, B2M, BCAP29, CALR, CAMK2D, CAMK2G, CANX, CASP4, CAV1, CDC42, CLCC1, COPA, COPB2, CYP2J2, CYP51A1, DDOST, DHCR7, ELOVL5, EMC1, EMC2, EMC3, ERAP1, ERAP2, ERGIC1, ERMP1, ERP44, FKBP8, FMO4, FOLR1, GALNT2, GDPD1, HLA-A, HLA-B, HLA-C, HLA-E, HLA-F, HLA-G, HM13, HSD17B7, HSP90B1, HSPA5, KPNB1, LCLAT1, LMAN2L, LMF2, LPCAT3, LRRC8D, LSS, MGST1, MOGS, MOSPD2, MX1, NCLN, NOMO1, NOMO2,…
KEGG:04612	Antigen processing and presentation	KEGG_13.05.2021	1.41702e-07	0.000205185	19.2308	15	[B2M, CALR, CANX, CTSS, HLA-A, HLA-B, HLA-C, HLA-E, HLA-F, HLA-G, HSP90AB1, HSPA5, PSME2, TAP1, TAP2]
GO:0002483	antigen processing and presentation of endogenous peptide antigen	GO_BiologicalProcess-EBI-UniProt-GOA-ACAP-ARAP_13.05.2021_00h00	4.09184e-11	6.21142e-08	52.381	11	[B2M, ERAP1, ERAP2, HLA-A, HLA-B, HLA-C, HLA-E, HLA-F, HLA-G, TAP1, TAP2]
GO:0031300	intrinsic component of organelle membrane	GO_CellularComponent-EBI-UniProt-GOA-ACAP-ARAP_13.05.2021_00h00	9.75646e-12	1.48786e-08	11.1369	48	[B2M, BAK1, CALR, CANX, CHST4, CPT1A, DHCR7, ECE1, ELOVL5, EMC1, EMC2, EMC3, ERGIC1, FKBP8, GALNT2, HLA-A, HLA-B, HLA-C, HLA-E, HLA-F, HLA-G, HM13, HSPA5, LRRC8A, MCU, MCUB, NPC1, OXA1L, P2RX4, PIGK, PIGS, PRKD2, QSOX1, QSOX2, RAB35, RRBP1, SAMM50, SGPL1, SLC35A3, STING1, TAP1, TAP2, TAPT1, TMCO1, TMEM43, TMEM70, TOMM40, ZMPSTE24]
GO:0140534	endoplasmic reticulum protein-containing complex	GO_CellularComponent-EBI-UniProt-GOA-ACAP-ARAP_13.05.2021_00h00	3.99343e-11	6.06602e-08	18.1159	25	[B2M, CALR, DDOST, EMC1, EMC2, EMC3, GET3, HLA-A, HM13, HSP90B1, HSPA5, PIGK, PIGS, RPN1, RPN2, SEC63, SEL1L, SPCS2, SPTLC1, SSR4, STT3A, STT3B, TAP1, TAP2, UGT1A4]
GO:0031301	integral component of organelle membrane	GO_CellularComponent-EBI-UniProt-GOA-ACAP-ARAP_13.05.2021_00h00	3.14298e-11	4.77734e-08	11.25	45	[B2M, BAK1, CALR, CANX, CPT1A, DHCR7, ELOVL5, EMC1, EMC2, EMC3, ERGIC1, FKBP8, GALNT2, HLA-A, HLA-B, HLA-C, HLA-E, HLA-F, HLA-G, HM13, HSPA5, LRRC8A, MCU, MCUB, NPC1, OXA1L, P2RX4, PIGK, PIGS, PRKD2, QSOX1, QSOX2, RRBP1, SAMM50, SGPL1, SLC35A3, STING1, TAP1, TAP2, TAPT1, TMCO1, TMEM43, TMEM70, TOMM40, ZMPSTE24]
GO:0030176	integral component of endoplasmic reticulum membrane	GO_CellularComponent-EBI-UniProt-GOA-ACAP-ARAP_13.05.2021_00h00	3.85139e-12	5.88878e-09	17.2619	29	[B2M, CALR, CANX, DHCR7, ELOVL5, EMC1, EMC2, EMC3, ERGIC1, FKBP8, HLA-A, HLA-B, HLA-C, HLA-E, HLA-F, HLA-G, HM13, HSPA5, PIGK, PIGS, PRKD2, RRBP1, SGPL1, STING1, TAP1, TAP2, TAPT1, TMCO1, ZMPSTE24]
GO:0071556	integral component of lumenal side of endoplasmic reticulum membrane	GO_CellularComponent-EBI-UniProt-GOA-ACAP-ARAP_13.05.2021_00h00	1.37548e-07	0.000199445	31.25	10	[CALR, CANX, HLA-A, HLA-B, HLA-C, HLA-E, HLA-F, HLA-G, HM13, PRKD2]
GO:0002444	myeloid leukocyte mediated immunity	GO_BiologicalProcess-EBI-UniProt-GOA-ACAP-ARAP_13.05.2021_00h00	3.77827e-22	5.92055e-19	12.701	79	[ACLY, AGA, ANPEP, APEH, ASAH1, B2M, BST1, BST2, C3, C6orf120, CD14, CD47, CD55, CEACAM21, CFD, CFP, CHI3L1, CRISP3, CTSS, DDOST, DERA, DNAJC13, DNAJC3, DPP7, ERP44, FRK, GAB2, GGH, GRN, HK3, HLA-B, HLA-C, HLA-E, HP, HPR, HSP90AB1, ITGAV, KPNB1, LCN2, LGALS9, LTF, MGST1, MOSPD2, NCSTN, PGLYRP1, PLAU, PNP, PRDX4, PRSS8, PSAP, PSMB1, PSMD6, PSMD7, PTPRJ, QPCT, QSOX1, RAB24, S100A11, S100A12, S100A8…
GO:0005773	vacuole	GO_CellularComponent-EBI-UniProt-GOA-ACAP-ARAP_13.05.2021_00h00	8.64054e-09	1.27966e-05	7.78165	67	[ABCD4, ABHD6, ACLY, ADA, AGA, ANPEP, AP3D1, ASAH1, ATP6V0A2, ATP6V0A4, BST2, C3, C6orf120, CALCRL, CDC42, CP, CTSS, CTSV, DDOST, DNAJC13, DNAJC3, DPP4, DPP7, DTX3L, ECE1, FFAR4, FLOT1, FRK, FYCO1, GGH, GRN, HLA-F, HSP90AB1, LRRC8A, MGST1, NCSTN, NPC1, OPTN, P2RX4, PCYOX1, PIP4K2A, PRSS8, PSAP, RAB24, RDH14, RPN2, SDCBP, SGSH, SLC35F6, SLC3A2, SLCO4C1, SPNS1, SQSTM1, STING1, STOM, STXBP2, SURF4, …
GO:0036230	granulocyte activation	GO_BiologicalProcess-EBI-UniProt-GOA-ACAP-ARAP_13.05.2021_00h00	1.02598e-23	1.61695e-20	13.7255	77	[ACLY, AGA, ANPEP, APEH, ASAH1, B2M, BST1, BST2, C3, C6orf120, CD14, CD47, CD55, CEACAM21, CFD, CFP, CHI3L1, CRISP3, CTSS, DDOST, DERA, DNAJC13, DNAJC3, DPP7, ENPP3, ERP44, FRK, GGH, GRN, HK3, HLA-B, HLA-C, HP, HPR, HSP90AB1, ITGAV, KARS1, KPNB1, LCN2, LTF, MGST1, MOSPD2, NCSTN, PGLYRP1, PLAU, PNP, PRDX4, PRSS8, PSAP, PSMB1, PSMD6, PSMD7, PTPRJ, QPCT, QSOX1, RAB24, S100A11, S100A12, S100A8, S100A…
GO:0043299	leukocyte degranulation	GO_BiologicalProcess-EBI-UniProt-GOA-ACAP-ARAP_13.05.2021_00h00	2.47272e-23	3.88464e-20	13.255	79	[ACLY, AGA, ANPEP, APEH, ASAH1, B2M, BST1, BST2, C3, C6orf120, CD14, CD47, CD55, CEACAM21, CFD, CFP, CHI3L1, CRISP3, CTSS, DDOST, DERA, DNAJC13, DNAJC3, DPP7, ERP44, FRK, GAB2, GGH, GRN, HK3, HLA-B, HLA-C, HLA-F, HP, HPR, HSP90AB1, ITGAV, KPNB1, LCN2, LGALS9, LTF, MGST1, MOSPD2, NCSTN, PGLYRP1, PLAU, PNP, PRDX4, PRSS8, PSAP, PSMB1, PSMD6, PSMD7, PTPRJ, QPCT, QSOX1, RAB24, S100A11, S100A12, S100A8…
GO:0005764	lysosome	GO_CellularComponent-EBI-UniProt-GOA-ACAP-ARAP_13.05.2021_00h00	3.18645e-08	4.67452e-05	7.92602	60	[ABCD4, ABHD6, ACLY, ADA, AGA, ANPEP, AP3D1, ASAH1, ATP6V0A2, ATP6V0A4, BST2, C3, C6orf120, CALCRL, CP, CTSS, CTSV, DDOST, DNAJC13, DNAJC3, DPP4, DPP7, DTX3L, ECE1, FFAR4, FLOT1, FRK, FYCO1, GGH, GRN, HLA-F, HSP90AB1, LRRC8A, MGST1, NCSTN, NPC1, P2RX4, PCYOX1, PIP4K2A, PRSS8, PSAP, RDH14, SDCBP, SGSH, SLC35F6, SLC3A2, SLCO4C1, SPNS1, SQSTM1, STOM, STXBP2, SURF4, TCIRG1, TCN2, TLR3, TMEM165, TSPAN…
GO:0043312	neutrophil degranulation	GO_BiologicalProcess-EBI-UniProt-GOA-ACAP-ARAP_13.05.2021_00h00	1.55235e-23	2.4434e-20	13.9405	75	[ACLY, AGA, ANPEP, APEH, ASAH1, B2M, BST1, BST2, C3, C6orf120, CD14, CD47, CD55, CEACAM21, CFD, CFP, CHI3L1, CRISP3, CTSS, DDOST, DERA, DNAJC13, DNAJC3, DPP7, ERP44, FRK, GGH, GRN, HK3, HLA-B, HLA-C, HP, HPR, HSP90AB1, ITGAV, KPNB1, LCN2, LTF, MGST1, MOSPD2, NCSTN, PGLYRP1, PLAU, PNP, PRDX4, PRSS8, PSAP, PSMB1, PSMD6, PSMD7, PTPRJ, QPCT, QSOX1, RAB24, S100A11, S100A12, S100A8, S100A9, SDCBP, SERP…
GO:0042582	azurophil granule	GO_CellularComponent-EBI-UniProt-GOA-ACAP-ARAP_13.05.2021_00h00	4.92902e-07	0.000702878	12.6437	22	[ACLY, AGA, BST2, C3, C6orf120, DDOST, DNAJC13, DNAJC3, DPP7, FRK, GGH, GRN, MGST1, NCSTN, PRSS8, PSAP, SDCBP, SLCO4C1, STOM, STXBP2, SURF4, VNN1]
GO:1901135	carbohydrate derivative metabolic process	GO_BiologicalProcess-EBI-UniProt-GOA-ACAP-ARAP_13.05.2021_00h00	7.79154e-11	1.17496e-07	7.4736	92	[ABHD6, ACACA, ACLY, ACOT7, ACOT9, ACP6, ACSL3, ADA, AGA, AGO2, ALG12, ASAH1, ATP5F1C, B3GNT7, CHI3L1, CHST4, CMPK2, CTPS2, DDOST, DERA, ELOVL5, EOGT, EPHA2, ERP44, FBXO6, GALNT12, GALNT14, GALNT2, GALNT3, GALNT6, GALNT7, GART, GFPT1, GFPT2, GK, GK3P, GNE, GPD2, HK2, HK3, HMGCS1, HPRT1, MAN2A1, MAN2A2, MOGS, MTCO2P12, MUC13, MUC4, MUC5AC, MVK, NCSTN, NME3, NPC1, NT5C2, NT5C3A, OGDH, PANK4, PDCD6,…
GO:0019637	organophosphate metabolic process	GO_BiologicalProcess-EBI-UniProt-GOA-ACAP-ARAP_13.05.2021_00h00	1.6367e-07	0.000236503	6.81818	78	[ABHD6, ACACA, ACLY, ACOT7, ACOT9, ACP6, ACSL3, ADA, ATP5F1C, CDC42, CKB, CMPK2, CNP, CTPS2, DERA, ELOVL5, ENPP2, ENPP3, EPHA2, GARS1, GART, GDE1, GDPD1, GFPT1, GFPT2, GK, GK3P, GMPR, GNPAT, GPD2, GPHN, HK2, HK3, HMGCS1, HPRT1, IDI1, IDO1, ISYNA1, KARS1, LCLAT1, LPCAT3, ME1, MTCO2P12, MVK, NME3, NT5C2, NT5C3A, OGDH, PANK4, PARP9, PDHX, PFKFB2, PGPEP1, PHB2, PI4KA, PIGK, PIGS, PIP4K2A, PLCH1, PLPP…
GO:0055086	nucleobase-containing small molecule metabolic process	GO_BiologicalProcess-EBI-UniProt-GOA-ACAP-ARAP_13.05.2021_00h00	2.28796e-07	0.000329467	7.85185	53	[ACACA, ACLY, ACOT7, ACOT9, ACSL3, ADA, ATP5F1C, CMPK2, CNP, CTPS2, DERA, ELOVL5, ENPP3, EPHA2, GARS1, GART, GFPT1, GFPT2, GMPR, GNE, HK2, HK3, HMGCS1, HPRT1, IDO1, KARS1, ME1, MTCO2P12, MVK, NME3, NT5C2, NT5C3A, OGDH, PANK4, PARP9, PDHX, PFKFB2, PNP, PRTFDC1, RRM1, SLC35A3, SLC5A8, SLPI, STAT3, SUCLA2, SULT1E1, TIGAR, TSPO, TXNRD1, UGGT1, UPP1, UPP2, XDH]
GO:1901137	carbohydrate derivative biosynthetic process	GO_BiologicalProcess-EBI-UniProt-GOA-ACAP-ARAP_13.05.2021_00h00	2.56289e-09	3.8187e-06	8.36763	61	[ACACA, ACLY, ACOT7, ACSL3, ADA, AGO2, ALG12, ATP5F1C, B3GNT7, CHST4, CMPK2, CTPS2, DDOST, ELOVL5, EOGT, GALNT12, GALNT14, GALNT2, GALNT3, GALNT6, GALNT7, GART, GFPT1, GFPT2, GK, GK3P, GNE, HPRT1, MAN2A1, MAN2A2, MOGS, MTCO2P12, MUC13, MUC4, MUC5AC, NCSTN, NME3, NPC1, PANK4, PDCD6, PDHX, PIGK, PIGS, PLOD1, PLOD3, PNP, PRTFDC1, RPN1, RPN2, RRM1, SLPI, ST3GAL1, ST6GAL1, STAT3, STT3A, STT3B, TMEM165…
GO:1901566	organonitrogen compound biosynthetic process	GO_BiologicalProcess-EBI-UniProt-GOA-ACAP-ARAP_13.05.2021_00h00	3.07003e-11	4.66952e-08	6.70213	126	[ABAT, ABCB7, ACACA, ACLY, ACOT7, ACSL3, ADA, AGO1, AGO2, AGO4, ALG12, APEH, ASAH1, ASNS, ATP5F1C, B3GNT7, CALR, CASC3, CBS, CBSL, CHST4, CKB, CMPK2, COX15, CPOX, CTPS2, DDOST, DNAJC3, EIF2B1, EIF4G1, ELOVL5, EOGT, ETF1, GALNT12, GALNT14, GALNT2, GALNT3, GALNT6, GALNT7, GARS1, GART, GFPT1, GFPT2, GGT7, GLS, GLUD1, GLUD2, GMPR, GOT2, GPHN, GSPT1, GSPT2, HPRT1, IBA57, IDO1, KARS1, LPCAT3, MAN2A1, M…
GO:0009100	glycoprotein metabolic process	GO_BiologicalProcess-EBI-UniProt-GOA-ACAP-ARAP_13.05.2021_00h00	9.51668e-08	0.000138372	9.28074	40	[AGA, AGO2, ALG12, B3GNT7, CHST4, DDOST, EOGT, ERP44, FBXO6, GALNT12, GALNT14, GALNT2, GALNT3, GALNT6, GALNT7, GFPT1, GFPT2, MAN2A1, MAN2A2, MOGS, MUC13, MUC4, MUC5AC, NCSTN, NPC1, PDCD6, PLOD1, PLOD3, RPN1, RPN2, SEL1L, SGSH, SLPI, ST3GAL1, ST6GAL1, STT3A, STT3B, TMEM165, TMTC3, UGGT1]
GO:0009101	glycoprotein biosynthetic process	GO_BiologicalProcess-EBI-UniProt-GOA-ACAP-ARAP_13.05.2021_00h00	1.15583e-07	0.000167826	9.94318	35	[AGO2, ALG12, B3GNT7, CHST4, DDOST, EOGT, GALNT12, GALNT14, GALNT2, GALNT3, GALNT6, GALNT7, GFPT1, GFPT2, MAN2A1, MAN2A2, MOGS, MUC13, MUC4, MUC5AC, NCSTN, NPC1, PDCD6, PLOD1, PLOD3, RPN1, RPN2, SLPI, ST3GAL1, ST6GAL1, STT3A, STT3B, TMEM165, TMTC3, UGGT1]
GO:0006486	protein glycosylation	GO_BiologicalProcess-EBI-UniProt-GOA-ACAP-ARAP_13.05.2021_00h00	1.17044e-09	1.74747e-06	12.406	33	[ALG12, B3GNT7, CHST4, DDOST, EOGT, GALNT12, GALNT14, GALNT2, GALNT3, GALNT6, GALNT7, GFPT1, GFPT2, MAN2A1, MAN2A2, MOGS, MUC13, MUC4, MUC5AC, NPC1, PDCD6, PLOD1, PLOD3, RPN1, RPN2, SLPI, ST3GAL1, ST6GAL1, STT3A, STT3B, TMEM165, TMTC3, UGGT1]
GO:0006493	protein O-linked glycosylation	GO_BiologicalProcess-EBI-UniProt-GOA-ACAP-ARAP_13.05.2021_00h00	6.56551e-07	0.000931646	15.3153	17	[B3GNT7, CHST4, EOGT, GALNT12, GALNT14, GALNT2, GALNT3, GALNT6, GALNT7, MUC13, MUC4, MUC5AC, PLOD1, PLOD3, ST3GAL1, ST6GAL1, TMTC3]
KEGG:05012	Parkinson disease	KEGG_13.05.2021	4.89907e-08	7.17224e-05	11.6466	29	[ATP5F1C, CAMK2D, CAMK2G, DAXX, GNAI2, HSPA5, KLC1, MCU, NDUFB10, NDUFB11, NDUFB5, NDUFB7, NDUFB9, NDUFS8, PSMA3, PSMB1, PSMB3, PSMD6, PSMD7, SDHA, SDHC, SLC25A6, TRAP1, UBA7, UBE2L6, UQCRC1, UQCRC2, VDAC2, VDAC3]
GO:1990204	oxidoreductase complex	GO_CellularComponent-EBI-UniProt-GOA-ACAP-ARAP_13.05.2021_00h00	6.41874e-08	9.37778e-05	16.1017	19	[BCKDHB, CYB5B, DUOX2, GMPR, GPD2, NDUFAF1, NDUFB10, NDUFB11, NDUFB5, NDUFB7, NDUFB9, NDUFS8, OGDH, PDHX, RRM1, SDHA, SDHC, UQCRC1, UQCRC2]
GO:0031967	organelle envelope	GO_CellularComponent-EBI-UniProt-GOA-ACAP-ARAP_13.05.2021_00h00	4.00395e-12	6.11804e-09	7.66847	99	[ABCB7, ABCB8, ABHD6, ACAD9, ACSL3, APEH, ATAD1, ATAD3A, ATP5F1C, BAK1, CALR, CASC3, CHMP4A, CISD1, CLCC1, CNP, COX15, CPOX, CPT1A, CYB5B, DHCR7, ECSIT, FKBP8, GARS1, GK, GK3P, GNPAT, GOT2, GPD2, GRPEL1, GTF3C3, HK2, IPO5, IPO7, IPO8, KPNA1, KPNB1, LMNA, MCU, MCUB, MFSD10, MGST1, MICU2, MRPL16, MRPS25, MTCH2, MTCO2P12, MTERF3, MX1, MX2, MYO1E, NDUFAF1, NDUFB10, NDUFB11, NDUFB5, NDUFB7, NDUFB9, ND…
GO:0005739	mitochondrion	GO_CellularComponent-EBI-UniProt-GOA-ACAP-ARAP_13.05.2021_00h00	6.52193e-15	1.00568e-11	7.44133	130	[ABAT, ABCB7, ABCB8, ABHD6, ACAD9, ACOT7, ACOT9, ACP6, ACSL3, ATAD1, ATAD3A, ATP5F1C, ATPAF2, BAK1, BCKDHB, CASP4, CISD1, CMPK2, CNP, COX15, CPOX, CPT1A, CRYM, CYB5B, DNAJA3, ECSIT, ENOSF1, FKBP8, GARS1, GK, GK3P, GLS, GLUD1, GLUD2, GNPAT, GOT2, GPD2, GRPEL1, HADH, HK2, HK3, HSDL2, HSP90AB1, HSPA5, IBA57, IDH3A, IDH3B, IDH3G, IFIT3, KARS1, MAP2K1, MCCC1, MCU, MCUB, ME1, ME2, ME3, MGST1, MICU2, MR…
GO:0019866	organelle inner membrane	GO_CellularComponent-EBI-UniProt-GOA-ACAP-ARAP_13.05.2021_00h00	8.48137e-09	1.25694e-05	8.83882	51	[ABCB7, ABCB8, ACAD9, ATAD3A, ATP5F1C, CNP, COX15, ECSIT, GARS1, GOT2, GPD2, GRPEL1, MCU, MCUB, MFSD10, MICU2, MRPL16, MRPS25, MTCH2, MTCO2P12, NDUFAF1, NDUFB10, NDUFB11, NDUFB5, NDUFB7, NDUFB9, NDUFS8, OXA1L, P2RX4, PHB, PHB2, PTPN1, RSAD2, SAMM50, SDHA, SDHC, SIGMAR1, SLC25A10, SLC25A24, SLC25A6, SPNS1, STAT3, TMEM43, TMEM70, TMX4, TOMM40, TRAP1, UQCC1, UQCRC1, UQCRC2, ZMPSTE24]
GO:0005740	mitochondrial envelope	GO_CellularComponent-EBI-UniProt-GOA-ACAP-ARAP_13.05.2021_00h00	4.12528e-11	6.25805e-08	8.57488	71	[ABCB7, ABCB8, ABHD6, ACAD9, ACSL3, ATAD1, ATAD3A, ATP5F1C, BAK1, CISD1, CNP, COX15, CPOX, CPT1A, CYB5B, ECSIT, FKBP8, GK, GK3P, GNPAT, GOT2, GPD2, GRPEL1, HK2, MCU, MCUB, MGST1, MICU2, MRPL16, MRPS25, MTCH2, MTCO2P12, MTERF3, MX1, MX2, NDUFAF1, NDUFB10, NDUFB11, NDUFB5, NDUFB7, NDUFB9, NDUFS8, NIPSNAP2, OGDH, OXA1L, PHB, PHB2, PNPT1, PTPN1, RSAD2, SAMM50, SDHA, SDHC, SLC25A10, SLC25A24, SLC25A6,…
GO:0045333	cellular respiration	GO_BiologicalProcess-EBI-UniProt-GOA-ACAP-ARAP_13.05.2021_00h00	2.2452e-07	0.000323533	11.1111	28	[ATP5F1C, CISD1, COX15, GPD2, IDH3A, IDH3B, IDH3G, ME2, ME3, MTCO2P12, NDUFAF1, NDUFB10, NDUFB11, NDUFB5, NDUFB7, NDUFB9, NDUFS8, NIPSNAP2, OGDH, OXA1L, PDE12, PNPT1, SDHA, SDHC, SUCLA2, TRAP1, UQCRC1, UQCRC2]
GO:0031966	mitochondrial membrane	GO_CellularComponent-EBI-UniProt-GOA-ACAP-ARAP_13.05.2021_00h00	4.35299e-11	6.59477e-08	8.72914	68	[ABCB7, ABCB8, ABHD6, ACAD9, ACSL3, ATAD1, ATAD3A, ATP5F1C, BAK1, CISD1, CNP, COX15, CPT1A, CYB5B, ECSIT, FKBP8, GK, GK3P, GNPAT, GOT2, GPD2, GRPEL1, HK2, MCU, MCUB, MGST1, MICU2, MRPL16, MRPS25, MTCH2, MTCO2P12, MTERF3, MX1, MX2, NDUFAF1, NDUFB10, NDUFB11, NDUFB5, NDUFB7, NDUFB9, NDUFS8, NIPSNAP2, OGDH, OXA1L, PHB, PHB2, PTPN1, RSAD2, SAMM50, SDHA, SDHC, SLC25A10, SLC25A24, SLC25A6, SLC27A3, SPN…
GO:0098800	inner mitochondrial membrane protein complex	GO_CellularComponent-EBI-UniProt-GOA-ACAP-ARAP_13.05.2021_00h00	4.44898e-07	0.000636204	13.6986	20	[ATP5F1C, GRPEL1, MCU, MCUB, MICU2, NDUFAF1, NDUFB10, NDUFB11, NDUFB5, NDUFB7, NDUFB9, NDUFS8, PHB, PHB2, SAMM50, SDHA, SDHC, SLC25A6, UQCRC1, UQCRC2]
GO:0005743	mitochondrial inner membrane	GO_CellularComponent-EBI-UniProt-GOA-ACAP-ARAP_13.05.2021_00h00	2.84905e-07	0.000408839	8.56031	44	[ABCB7, ABCB8, ACAD9, ATAD3A, ATP5F1C, CNP, COX15, ECSIT, GOT2, GPD2, GRPEL1, MCU, MCUB, MICU2, MRPL16, MRPS25, MTCH2, MTCO2P12, NDUFAF1, NDUFB10, NDUFB11, NDUFB5, NDUFB7, NDUFB9, NDUFS8, OXA1L, PHB, PHB2, PTPN1, RSAD2, SAMM50, SDHA, SDHC, SLC25A10, SLC25A24, SLC25A6, SPNS1, STAT3, TMEM70, TOMM40, TRAP1, UQCC1, UQCRC1, UQCRC2]
GO:0031984	organelle subcompartment	GO_CellularComponent-EBI-UniProt-GOA-ACAP-ARAP_13.05.2021_00h00	4.52639e-16	6.9978e-13	7.47158	138	[ABCD4, ACSL3, ALG12, AP3D1, B2M, B3GNT7, BCAP29, CALR, CAMK2D, CAMK2G, CANX, CASP4, CAV1, CD55, CDC42, CHST4, CLCC1, COPA, COPB2, CYP2J2, CYP51A1, DDOST, DHCR7, ELOVL5, EMC1, EMC2, EMC3, ERAP1, ERAP2, ERGIC1, ERMP1, ERP44, FKBP8, FLNA, FMO4, FOLR1, GALNT12, GALNT14, GALNT2, GALNT3, GALNT6, GALNT7, GBP2, GDPD1, GLG1, GRN, HLA-A, HLA-B, HLA-C, HLA-E, HLA-F, HLA-G, HM13, HSD17B7, HSP90B1, HSPA5, KP…
GO:0031090	organelle membrane	GO_CellularComponent-EBI-UniProt-GOA-ACAP-ARAP_13.05.2021_00h00	3.28953e-31	5.20074e-28	7.16355	272	[ABCB7, ABCB8, ABCD4, ABHD6, ACAD9, ACSL3, ALG12, ANPEP, AP3D1, APEH, AQP5, ATAD1, ATAD3A, ATP5F1C, ATP6V0A2, ATP6V0A4, B2M, B3GNT7, BAIAP2L2, BAK1, BCAP29, BST1, BST2, CALR, CAMK2D, CAMK2G, CANX, CASC3, CASP4, CAV1, CD109, CD14, CD47, CD55, CDC42, CEACAM21, CHMP4A, CHMP6, CHST4, CISD1, CLCC1, CNP, COPA, COPB2, COX15, CP, CPT1A, CYB5B, CYP2J2, CYP51A1, DDOST, DHCR7, DNAJC13, DPP4, DTX3L, ECE1, EC…
GO:0031410	cytoplasmic vesicle	GO_CellularComponent-EBI-UniProt-GOA-ACAP-ARAP_13.05.2021_00h00	1.11509e-24	1.75961e-21	7.66224	196	[ABHD6, ACLY, ACTN1, ACTN2, ADA, AGA, ANPEP, AP3D1, APEH, AQP5, ARHGDIB, ASAH1, ATP6V0A2, ATP6V0A4, B2M, BAIAP2, BAIAP2L2, BST1, BST2, C3, C6orf120, CALCRL, CALR, CAMK2D, CAMK2G, CANX, CAV1, CD109, CD14, CD47, CD55, CDC42, CEACAM21, CFD, CFP, CHI3L1, CHMP4A, CHMP6, CNP, COPA, COPB2, CRISP3, CTSS, CTSV, DDOST, DERA, DNAJC13, DNAJC3, DPEP3, DPP4, DPP7, DTX3L, ECE1, ECM1, EHD1, EHD4, ERGIC1, ERP44, …
GO:0012506	vesicle membrane	GO_CellularComponent-EBI-UniProt-GOA-ACAP-ARAP_13.05.2021_00h00	6.25501e-11	9.44507e-08	7.47812	94	[ABHD6, ANPEP, AP3D1, AQP5, ATP6V0A2, ATP6V0A4, B2M, BAIAP2L2, BST1, BST2, CALR, CAMK2D, CAMK2G, CAV1, CD109, CD14, CD47, CD55, CEACAM21, CHMP4A, CHMP6, COPA, COPB2, DDOST, DNAJC13, DTX3L, ECE1, EHD1, EHD4, EXOC3, F3, FFAR4, FOLR1, GDE1, GIPC1, GPRC5A, GPRC5C, GRB2, HLA-A, HLA-B, HLA-C, HLA-E, HLA-F, HLA-G, ITGAV, MGST1, MOSPD2, MYO1B, MYO1E, MYO5B, NCDN, NCSTN, NOL3, NPC1, OPTN, PACSIN2, PAM, PD…
GO:0098588	bounding membrane of organelle	GO_CellularComponent-EBI-UniProt-GOA-ACAP-ARAP_13.05.2021_00h00	3.99602e-14	6.14588e-11	6.77817	154	[ABCD4, ABHD6, ACSL3, ANPEP, AP3D1, ATAD1, ATP6V0A2, ATP6V0A4, B2M, B3GNT7, BAK1, BST1, BST2, CALR, CAMK2D, CAMK2G, CAV1, CD109, CD14, CD47, CD55, CDC42, CEACAM21, CHMP4A, CHMP6, CHST4, CISD1, CLCC1, CNP, COPA, COPB2, CP, CPT1A, CYB5B, DDOST, DHCR7, DNAJC13, DPP4, DTX3L, ECE1, EHD1, EHD4, ERGIC1, EXOC3, F3, FFAR4, FLOT1, FOLR1, GALNT12, GALNT14, GALNT2, GALNT3, GALNT6, GALNT7, GBP2, GK, GK3P, GLG…
GO:0005768	endosome	GO_CellularComponent-EBI-UniProt-GOA-ACAP-ARAP_13.05.2021_00h00	2.64037e-08	3.88134e-05	7.20461	75	[ABHD6, AP3D1, ASAH1, ATP6V0A2, ATP6V0A4, B2M, BST2, CALCRL, CAV1, CD14, CHMP4A, CHMP6, CTSS, DNAJC13, DTX3L, ECE1, EHD1, EHD4, EXOC8, EZR, F3, FFAR4, FLOT1, FOLR1, FYCO1, GRB2, GRN, HLA-A, HLA-B, HLA-C, HLA-E, HLA-F, HLA-G, LTF, MAP2K1, MYO1B, MYO1D, MYO5B, NCDN, NCSTN, NOL3, NPC1, OPTN, PACSIN2, PDCD6, PHB, PICK1, PML, PRKCI, PSAP, PTPN1, RAB24, RAB35, RAB8A, RIPK1, SLC5A1, SNX17, SQSTM1, STEAP…
GO:0030139	endocytic vesicle	GO_CellularComponent-EBI-UniProt-GOA-ACAP-ARAP_13.05.2021_00h00	5.80099e-10	8.66668e-07	11.1111	40	[ATP6V0A2, ATP6V0A4, B2M, CALR, CAMK2D, CAMK2G, CAV1, CDC42, CTSS, DPP4, EHD1, EHD4, F3, FFAR4, GIPC1, HLA-A, HLA-B, HLA-C, HLA-E, HLA-F, HLA-G, HP, HPR, HSP90B1, ITGAV, LTF, MYO1E, PGLYRP1, PICK1, RAB24, RAB35, RAB8A, SPARC, SYK, TAP1, TAP2, TCIRG1, TFRC, UNC93B1, VPS11]
GO:0099503	secretory vesicle	GO_CellularComponent-EBI-UniProt-GOA-ACAP-ARAP_13.05.2021_00h00	5.26607e-19	8.18873e-16	9.45094	105	[ACLY, ACTN1, ACTN2, AGA, ANPEP, APEH, ASAH1, ATP6V0A2, B2M, BAIAP2, BST1, BST2, C3, C6orf120, CALR, CAV1, CD109, CD14, CD47, CD55, CDC42, CEACAM21, CFD, CFP, CHI3L1, CRISP3, CTSS, CTSV, DDOST, DERA, DNAJC13, DNAJC3, DPEP3, DPP7, ECE1, ECM1, ERP44, EXOC3, F3, FRK, GARS1, GGH, GIPC1, GNAI2, GRN, HK3, HLA-B, HLA-C, HP, HPR, HSP90AB1, ITGAV, KPNB1, LCN2, LGALS3BP, LTF, MGST1, MOSPD2, NCS1, NCSTN, NO…
GO:0030141	secretory granule	GO_CellularComponent-EBI-UniProt-GOA-ACAP-ARAP_13.05.2021_00h00	1.68501e-22	2.64377e-19	10.7333	101	[ACLY, ACTN1, ACTN2, AGA, ANPEP, APEH, ASAH1, ATP6V0A2, B2M, BAIAP2, BST1, BST2, C3, C6orf120, CALR, CAV1, CD109, CD14, CD47, CD55, CDC42, CEACAM21, CFD, CFP, CHI3L1, CRISP3, CTSS, CTSV, DDOST, DERA, DNAJC13, DNAJC3, DPEP3, DPP7, ECE1, ECM1, ERP44, EXOC3, F3, FRK, GARS1, GGH, GNAI2, GRN, HK3, HLA-B, HLA-C, HP, HPR, HSP90AB1, ITGAV, KPNB1, LCN2, LGALS3BP, LTF, MGST1, MOSPD2, NCS1, NCSTN, NOL3, PAM…
GO:0030659	cytoplasmic vesicle membrane	GO_CellularComponent-EBI-UniProt-GOA-ACAP-ARAP_13.05.2021_00h00	1.60212e-09	2.39036e-06	8.08561	68	[ANPEP, AQP5, ATP6V0A2, ATP6V0A4, B2M, BAIAP2L2, BST1, BST2, CALR, CAMK2D, CAMK2G, CAV1, CD109, CD14, CD47, CD55, CEACAM21, CHMP4A, COPA, COPB2, DDOST, DNAJC13, EXOC3, F3, FOLR1, GDE1, GPRC5A, GPRC5C, HLA-A, HLA-B, HLA-C, HLA-E, HLA-F, HLA-G, ITGAV, MGST1, MOSPD2, MYO1E, MYO5B, NCSTN, PACSIN2, PAM, PDCD6, PICK1, PLAU, PRKD2, PSAP, PTPRJ, RAB24, RAB35, RAB8A, SIRPA, SIRPB1, SLCO4C1, SNX17, SPARC, …
GO:0005769	early endosome	GO_CellularComponent-EBI-UniProt-GOA-ACAP-ARAP_13.05.2021_00h00	5.12773e-07	0.000730188	9.02613	38	[ASAH1, B2M, CAV1, DNAJC13, DTX3L, EHD1, EHD4, F3, FLOT1, HLA-A, HLA-B, HLA-C, HLA-E, HLA-F, HLA-G, LTF, MAP2K1, MYO1B, MYO1D, NCSTN, NOL3, PACSIN2, PHB, PICK1, PML, PTPN1, SLC5A1, SNX17, STEAP4, TFRC, TLR3, TM9SF4, TMED7-TICAM2, TMEM165, VAC14, VPS11, VPS28, WASHC4]
GO:0030667	secretory granule membrane	GO_CellularComponent-EBI-UniProt-GOA-ACAP-ARAP_13.05.2021_00h00	1.30203e-08	1.92441e-05	10.6509	36	[ANPEP, BST1, BST2, CAV1, CD109, CD14, CD47, CD55, CEACAM21, DDOST, DNAJC13, EXOC3, HLA-B, HLA-C, ITGAV, MGST1, MOSPD2, NCSTN, PAM, PLAU, PSAP, PTPRJ, RAB24, SIRPA, SIRPB1, SLCO4C1, SPARC, STBD1, STING1, STOM, SURF4, TCIRG1, TMED2, TMED7-TICAM2, VNN1, VPS35L]
GO:0032879	regulation of localization	GO_BiologicalProcess-EBI-UniProt-GOA-ACAP-ARAP_13.05.2021_00h00	2.67653e-08	3.92915e-05	5.61207	160	[ABAT, ABHD6, ACSL3, ACTN1, ACTN2, ADA, ADAM9, ADGRG1, AGO2, AP3D1, ARHGDIB, ATAD1, B2M, BAK1, BST1, BST2, C2, C3, C4A, C4B, CALR, CAMK2D, CAMK2G, CAV1, CD14, CD47, CDC42, CHMP6, CIB1, CLDN4, CPSF6, CPT1A, CTSS, CYP51A1, DAG1, DENND5B, DNAJC13, DPP4, DTX3L, DUOX2, ECM1, EFHB, EHD1, EHD4, ENPP2, EPHA2, ERLEC1, EZR, F3, FERMT1, FFAR4, FLNA, FLOT1, FYCO1, GAB2, GHSR, GIPC1, GLUD1, GNAI2, GRN, HADH, …
GO:0006810	transport	GO_BiologicalProcess-EBI-UniProt-GOA-ACAP-ARAP_13.05.2021_00h00	3.17891e-25	5.0195e-22	6.08033	327	[ABAT, ABCB7, ABCB8, ABCC3, ABCD4, ACACA, ACLY, ACSL3, ACTN1, ACTN2, ADA, ADAM9, AGA, ANPEP, AP3D1, APEH, AQP5, ARPC1A, ARRDC1, ASAH1, ATAD1, ATP5F1C, ATP6V0A2, ATP6V0A4, B2M, BAIAP2, BAK1, BCAP29, BSPRY, BST1, BST2, C2, C3, C4A, C4B, C4BPB, C6orf120, CALCRL, CALR, CAMK2D, CAMK2G, CANX, CASC3, CAV1, CD109, CD14, CD47, CD55, CDC42, CEACAM21, CFD, CFHR4, CFI, CFP, CHI3L1, CHMP4A, CHMP6, CIB1, CLCA4…
GO:0008104	protein localization	GO_BiologicalProcess-EBI-UniProt-GOA-ACAP-ARAP_13.05.2021_00h00	4.04596e-09	6.0123e-06	5.79446	159	[ABAT, ACSL3, ACTN2, ADAM9, AP3D1, ARRDC1, ATAD1, ATP6V0A2, ATP6V0A4, BAIAP2, BCAP29, CALCRL, CALR, CAMK2G, CANX, CAV1, CDC42, CHMP4A, CHMP6, CIB1, COPA, COPB2, CPT1A, CYP51A1, DAG1, DNAJA3, DNAJC13, DPP4, DTX3L, EHD1, EHD4, EMC1, EMC2, EMC3, EPHA2, ERLEC1, EXOC3, EXOC8, EZR, F3, FERMT1, FLNA, FLOT1, FYCO1, GBP2, GET3, GHSR, GIPC1, GLUD1, GNAI2, GNPAT, GPHN, GRPEL1, HADH, HEATR3, HK2, HM13, HSP90…
GO:0051649	establishment of localization in cell	GO_BiologicalProcess-EBI-UniProt-GOA-ACAP-ARAP_13.05.2021_00h00	2.23627e-23	3.51542e-20	7.23639	210	[ABCD4, ACACA, ACLY, ACTN1, ACTN2, AGA, ANPEP, AP3D1, APEH, ASAH1, ATAD1, ATP5F1C, B2M, BAK1, BCAP29, BST1, BST2, C3, C6orf120, CALR, CAMK2D, CANX, CASC3, CAV1, CD109, CD14, CD47, CD55, CDC42, CEACAM21, CFD, CFP, CHI3L1, CHMP4A, CHMP6, CIB1, COPA, COPB2, CPSF6, CPT1A, CRISP3, CTSS, DDOST, DERA, DNAJC13, DNAJC3, DPP7, DTX3L, ECM1, EHD1, EHD4, ENDOD1, ERGIC1, ERLEC1, ERP44, EZR, F3, FERMT1, FLNA, F…
GO:0070727	cellular macromolecule localization	GO_BiologicalProcess-EBI-UniProt-GOA-ACAP-ARAP_13.05.2021_00h00	1.45167e-07	0.000210057	5.99583	115	[ACSL3, ACTN2, AP3D1, ATAD1, BCAP29, CALR, CASC3, CAV1, CDC42, CHMP4A, CIB1, COPA, COPB2, DAG1, DNAJA3, DTX3L, EHD1, EHD4, EMC1, EMC2, EMC3, EPHA2, ERLEC1, EXOC3, EXOC8, EZR, FERMT1, FLNA, FLOT1, FYCO1, GBP2, GET3, GHSR, GIPC1, GPHN, GRPEL1, HEATR3, HK2, HM13, HSP90AB1, HSP90B1, HSPA5, IKBKB, IPO4, IPO5, IPO7, IPO8, KATNB1, KPNA1, KPNA5, KPNA6, KPNB1, LMNA, MISP, MYADM, MYO1E, NPC1, NPTN, OPTN, O…
GO:0045184	establishment of protein localization	GO_BiologicalProcess-EBI-UniProt-GOA-ACAP-ARAP_13.05.2021_00h00	1.22284e-10	1.83916e-07	6.55567	126	[ABAT, ACSL3, ADAM9, AP3D1, ARRDC1, ATAD1, ATP6V0A2, ATP6V0A4, BCAP29, CALCRL, CALR, CAMK2G, CANX, CAV1, CDC42, CHMP4A, CHMP6, CIB1, COPA, COPB2, CPT1A, CYP51A1, DNAJC13, DPP4, DTX3L, EHD1, EMC1, EMC2, EMC3, ERLEC1, EXOC3, EXOC8, EZR, F3, FERMT1, FLNA, FYCO1, GET3, GIPC1, GLUD1, GNAI2, GRPEL1, HADH, HEATR3, HK2, HM13, HSP90AB1, HSP90B1, HSPA5, IPO4, IPO5, IPO7, IPO8, KATNB1, KPNA1, KPNA5, KPNA6, …
GO:0046907	intracellular transport	GO_BiologicalProcess-EBI-UniProt-GOA-ACAP-ARAP_13.05.2021_00h00	4.1786e-10	6.25119e-07	6.5885	118	[ABCD4, ACACA, ACTN2, AP3D1, ATAD1, ATP5F1C, BCAP29, CALR, CASC3, CD55, CDC42, CHMP4A, CHMP6, CIB1, COPA, COPB2, CPSF6, CPT1A, DNAJC13, DTX3L, EHD1, EHD4, ERGIC1, ERLEC1, EZR, FERMT1, FLNA, FOLR1, FYCO1, GEMIN4, GET3, GIPC1, GRPEL1, HEATR3, HM13, HSP90AB1, HSP90B1, HSPA5, IFT52, IPO4, IPO5, IPO7, IPO8, KATNB1, KIFAP3, KPNA1, KPNA5, KPNA6, KPNB1, LCA5L, LMAN2L, LMNA, MAP2K1, MX2, MYO1B, MYO1D, MYO…
GO:0051049	regulation of transport	GO_BiologicalProcess-EBI-UniProt-GOA-ACAP-ARAP_13.05.2021_00h00	1.78467e-07	0.000257707	6.04425	112	[ABAT, ACSL3, ACTN2, ADA, ADAM9, ATAD1, B2M, BAK1, BST2, C2, C3, C4A, C4B, CALR, CAMK2D, CAMK2G, CAV1, CD14, CD47, CDC42, CHMP6, CIB1, CPSF6, CPT1A, CTSS, CYP51A1, DENND5B, DNAJC13, DPP4, EFHB, EHD1, EHD4, ERLEC1, EZR, F3, FERMT1, FFAR4, FLNA, FLOT1, FYCO1, GAB2, GHSR, GIPC1, GLUD1, GNAI2, HADH, HK2, HLA-F, HSP90AB1, ICAM1, IPO5, ITGAV, LGALS9, LPCAT3, LRRC8A, MAP2K1, MCU, MX2, MYH10, MYO1E, NCS1…
GO:0051050	positive regulation of transport	GO_BiologicalProcess-EBI-UniProt-GOA-ACAP-ARAP_13.05.2021_00h00	2.60167e-07	0.00037438	7.00701	70	[ABAT, ACSL3, ACTN2, ADAM9, ATAD1, B2M, BAK1, C2, C3, C4A, C4B, CALR, CAV1, CD14, CD47, CDC42, CIB1, CPSF6, CTSS, DENND5B, EHD1, EZR, F3, FFAR4, FLNA, FLOT1, FYCO1, GAB2, GLUD1, GNAI2, HLA-F, HSP90AB1, IPO5, LPCAT3, LRRC8A, MCU, MYH10, MYO1E, NCS1, NIPSNAP2, NOL3, P2RX4, PDCD6IP, PDHX, PFKFB2, PICK1, PPP3CA, PPP3CB, PRKCI, PRKD2, PRSS8, PTPRJ, RBP4, S100A8, SDCBP, SIRPA, SIRPB1, SIRPG, SLC9A1, ST…
GO:0060627	regulation of vesicle-mediated transport	GO_BiologicalProcess-EBI-UniProt-GOA-ACAP-ARAP_13.05.2021_00h00	6.81909e-08	9.95587e-05	8.58676	48	[ACSL3, ACTN2, ATAD1, B2M, C2, C3, C4A, C4B, CALR, CAV1, CD14, CD47, CDC42, CHMP6, DNAJC13, EHD1, EHD4, EZR, F3, FLOT1, GAB2, GIPC1, GNAI2, HLA-F, ITGAV, LGALS9, MAP2K1, NCS1, NOL3, PACSIN2, PDCD6IP, PICK1, PLSCR1, PPP3CA, PPP3CB, PTPN1, PTPRJ, RAB8A, SDCBP, SIRPA, SIRPB1, SIRPG, SNX17, STXBP2, SYK, VPS11, VPS28, VSNL1]
GO:0071702	organic substance transport	GO_BiologicalProcess-EBI-UniProt-GOA-ACAP-ARAP_13.05.2021_00h00	6.68975e-15	1.03089e-11	6.51383	179	[ABAT, ABCB7, ABCC3, ABCD4, ACACA, ACSL3, ADA, ADAM9, AP3D1, AQP5, ARRDC1, ATAD1, ATP6V0A2, ATP6V0A4, BCAP29, C3, CALCRL, CALR, CAMK2G, CANX, CASC3, CAV1, CD47, CDC42, CFHR4, CHMP4A, CHMP6, CIB1, COPA, COPB2, CPSF6, CPT1A, CYP51A1, DENND5B, DNAJC13, DPP4, DTX3L, EHD1, ERLEC1, EXOC3, EXOC8, EZR, F3, FERMT1, FFAR4, FLNA, FLOT1, FOLR1, FYCO1, GET3, GHSR, GIPC1, GLUD1, GNAI2, GOT2, GRPEL1, HADH, HEAT…
GO:0071705	nitrogen compound transport	GO_BiologicalProcess-EBI-UniProt-GOA-ACAP-ARAP_13.05.2021_00h00	5.40271e-12	8.24994e-09	6.45581	149	[ABAT, ABCB7, ACSL3, ADA, ADAM9, AP3D1, ARRDC1, ATAD1, ATP6V0A2, ATP6V0A4, BCAP29, CALCRL, CALR, CAMK2G, CANX, CASC3, CAV1, CD47, CDC42, CHMP4A, CHMP6, CIB1, COPA, COPB2, CPSF6, CPT1A, CYP51A1, DNAJC13, DPP4, DTX3L, EHD1, ERLEC1, EXOC3, EXOC8, EZR, F3, FERMT1, FFAR4, FLNA, FLOT1, FOLR1, FYCO1, GET3, GHSR, GIPC1, GLUD1, GNAI2, GRPEL1, HADH, HEATR3, HM13, HSP90AB1, HSP90B1, HSPA5, IPO4, IPO5, IPO7,…
GO:0015031	protein transport	GO_BiologicalProcess-EBI-UniProt-GOA-ACAP-ARAP_13.05.2021_00h00	8.57528e-11	1.29229e-07	6.69248	121	[ABAT, ACSL3, ADAM9, AP3D1, ARRDC1, ATAD1, ATP6V0A2, ATP6V0A4, BCAP29, CALCRL, CALR, CAMK2G, CANX, CAV1, CDC42, CHMP4A, CHMP6, CIB1, COPA, COPB2, CPT1A, CYP51A1, DNAJC13, DPP4, DTX3L, EHD1, ERLEC1, EXOC3, EXOC8, EZR, F3, FERMT1, FLNA, FYCO1, GET3, GIPC1, GLUD1, GNAI2, GRPEL1, HADH, HEATR3, HM13, HSP90AB1, HSP90B1, HSPA5, IPO4, IPO5, IPO7, IPO8, KATNB1, KPNA1, KPNA5, KPNA6, KPNB1, LMAN2L, LMNA, LR…
GO:0006886	intracellular protein transport	GO_BiologicalProcess-EBI-UniProt-GOA-ACAP-ARAP_13.05.2021_00h00	2.20405e-08	3.24656e-05	7.25339	75	[AP3D1, ATAD1, BCAP29, CALR, CDC42, CHMP4A, CIB1, COPA, COPB2, EHD1, ERLEC1, FERMT1, FLNA, FYCO1, GET3, GIPC1, GRPEL1, HEATR3, HM13, HSP90AB1, HSP90B1, HSPA5, IPO4, IPO5, IPO7, IPO8, KATNB1, KPNA1, KPNA5, KPNA6, KPNB1, LMNA, MYO1E, OXA1L, PDCD6, PHB2, PICK1, PML, PPP3CA, PRKCI, PTPN1, RAB24, RAB35, RAB8A, RPL32, RPS11, SAMM50, SDCBP, SEC63, SEL1L, SLC25A6, SNX17, SPCS2, STAT3, STOM, STXBP2, SURF4…
KEGG:04612	Antigen processing and presentation	KEGG_13.05.2021	1.41702e-07	0.000205185	19.2308	15	[B2M, CALR, CANX, CTSS, HLA-A, HLA-B, HLA-C, HLA-E, HLA-F, HLA-G, HSP90AB1, HSPA5, PSME2, TAP1, TAP2]
KEGG:05169	Epstein-Barr virus infection	KEGG_13.05.2021	4.81592e-07	0.000687231	11.8812	24	[B2M, BAK1, CALR, HLA-A, HLA-B, HLA-C, HLA-E, HLA-F, HLA-G, ICAM1, IKBKB, ISG15, MAP2K3, NFKB2, OAS2, PSMD6, PSMD7, RIPK1, STAT1, STAT2, STAT3, SYK, TAP1, TAP2]
GO:0019884	antigen processing and presentation of exogenous antigen	GO_BiologicalProcess-EBI-UniProt-GOA-ACAP-ARAP_13.05.2021_00h00	3.50548e-09	5.21616e-06	13.8462	27	[AP3D1, B2M, CALR, CANX, CTSS, CTSV, HLA-A, HLA-B, HLA-C, HLA-E, HLA-F, HLA-G, IKBKB, ITGAV, KIFAP3, KLC1, PSMA3, PSMB1, PSMB10, PSMB3, PSMB8, PSMB9, PSMD6, PSMD7, PSME2, TAP1, TAP2]
GO:0048002	antigen processing and presentation of peptide antigen	GO_BiologicalProcess-EBI-UniProt-GOA-ACAP-ARAP_13.05.2021_00h00	1.96501e-09	2.92983e-06	13.7931	28	[B2M, CALR, CANX, CTSS, CTSV, ERAP1, ERAP2, HLA-A, HLA-B, HLA-C, HLA-E, HLA-F, HLA-G, IKBKB, ITGAV, KIFAP3, KLC1, PSMA3, PSMB1, PSMB10, PSMB3, PSMB8, PSMB9, PSMD6, PSMD7, PSME2, TAP1, TAP2]
GO:0002831	regulation of response to biotic stimulus	GO_BiologicalProcess-EBI-UniProt-GOA-ACAP-ARAP_13.05.2021_00h00	8.21093e-12	1.25299e-08	11.036	49	[ADAR, CD55, CUL1, DDX60, DHX58, DTX3L, ERAP1, GRN, HERC5, HLA-A, HLA-B, HLA-E, HLA-F, HLA-G, IFI16, IKBKB, ISG15, LBP, LGALS9, LTF, MUC13, MUC4, MUC5AC, NMI, OASL, OPTN, PARP14, PARP9, PLSCR1, PSMA3, PSMB1, PSMB10, PSMB3, PSMB8, PSMB9, PSMD6, PSMD7, PSME2, PTPN1, SERPING1, STAT1, STAT2, STING1, SYK, TIGAR, TRIM21, USP18, ZBP1, ZMPSTE24]
GO:0002474	antigen processing and presentation of peptide antigen via MHC class I	GO_BiologicalProcess-EBI-UniProt-GOA-ACAP-ARAP_13.05.2021_00h00	3.26952e-13	5.02198e-10	23.301	24	[B2M, CALR, CANX, ERAP1, ERAP2, HLA-A, HLA-B, HLA-C, HLA-E, HLA-F, HLA-G, IKBKB, ITGAV, PSMA3, PSMB1, PSMB10, PSMB3, PSMB8, PSMB9, PSMD6, PSMD7, PSME2, TAP1, TAP2]
GO:0002483	antigen processing and presentation of endogenous peptide antigen	GO_BiologicalProcess-EBI-UniProt-GOA-ACAP-ARAP_13.05.2021_00h00	4.09184e-11	6.21142e-08	52.381	11	[B2M, ERAP1, ERAP2, HLA-A, HLA-B, HLA-C, HLA-E, HLA-F, HLA-G, TAP1, TAP2]
GO:0002833	positive regulation of response to biotic stimulus	GO_BiologicalProcess-EBI-UniProt-GOA-ACAP-ARAP_13.05.2021_00h00	4.48903e-07	0.000641482	10.5072	29	[CUL1, DDX60, DHX58, GRN, HLA-E, HLA-F, HLA-G, IFI16, IKBKB, LBP, MUC13, MUC4, MUC5AC, NMI, OASL, PARP9, PLSCR1, PSMA3, PSMB1, PSMB10, PSMB3, PSMB8, PSMB9, PSMD6, PSMD7, PSME2, STING1, SYK, ZBP1]
GO:0019885	antigen processing and presentation of endogenous peptide antigen via MHC class I	GO_BiologicalProcess-EBI-UniProt-GOA-ACAP-ARAP_13.05.2021_00h00	8.24547e-09	1.2228e-05	57.1429	8	[B2M, ERAP1, ERAP2, HLA-A, HLA-B, HLA-C, TAP1, TAP2]
GO:0042590	antigen processing and presentation of exogenous peptide antigen via MHC class I	GO_BiologicalProcess-EBI-UniProt-GOA-ACAP-ARAP_13.05.2021_00h00	2.92795e-12	4.4827e-09	24.7059	21	[B2M, CALR, HLA-A, HLA-B, HLA-C, HLA-E, HLA-F, HLA-G, IKBKB, ITGAV, PSMA3, PSMB1, PSMB10, PSMB3, PSMB8, PSMB9, PSMD6, PSMD7, PSME2, TAP1, TAP2]
GO:0030139	endocytic vesicle	GO_CellularComponent-EBI-UniProt-GOA-ACAP-ARAP_13.05.2021_00h00	5.80099e-10	8.66668e-07	11.1111	40	[ATP6V0A2, ATP6V0A4, B2M, CALR, CAMK2D, CAMK2G, CAV1, CDC42, CTSS, DPP4, EHD1, EHD4, F3, FFAR4, GIPC1, HLA-A, HLA-B, HLA-C, HLA-E, HLA-F, HLA-G, HP, HPR, HSP90B1, ITGAV, LTF, MYO1E, PGLYRP1, PICK1, RAB24, RAB35, RAB8A, SPARC, SYK, TAP1, TAP2, TCIRG1, TFRC, UNC93B1, VPS11]
GO:0042612	MHC class I protein complex	GO_CellularComponent-EBI-UniProt-GOA-ACAP-ARAP_13.05.2021_00h00	2.64921e-08	3.89169e-05	63.6364	7	[B2M, HLA-A, HLA-B, HLA-C, HLA-E, HLA-F, HLA-G]
GO:0045088	regulation of innate immune response	GO_BiologicalProcess-EBI-UniProt-GOA-ACAP-ARAP_13.05.2021_00h00	5.97871e-11	9.03383e-08	11.976	40	[ADAR, CUL1, DHX58, ERAP1, GRN, HLA-A, HLA-B, HLA-E, HLA-F, HLA-G, IFI16, IKBKB, ISG15, LBP, LGALS9, MUC13, MUC4, MUC5AC, NMI, PARP14, PARP9, PLSCR1, PSMA3, PSMB1, PSMB10, PSMB3, PSMB8, PSMB9, PSMD6, PSMD7, PSME2, PTPN1, SERPING1, STAT1, STAT2, STING1, SYK, TRIM21, USP18, ZBP1]
GO:0045335	phagocytic vesicle	GO_CellularComponent-EBI-UniProt-GOA-ACAP-ARAP_13.05.2021_00h00	2.07579e-08	3.05972e-05	15.0685	22	[ATP6V0A2, ATP6V0A4, B2M, CALR, CDC42, CTSS, HLA-A, HLA-B, HLA-C, HLA-E, HLA-F, HLA-G, ITGAV, LTF, MYO1E, PGLYRP1, RAB8A, SYK, TAP1, TAP2, TCIRG1, UNC93B1]
GO:0030176	integral component of endoplasmic reticulum membrane	GO_CellularComponent-EBI-UniProt-GOA-ACAP-ARAP_13.05.2021_00h00	3.85139e-12	5.88878e-09	17.2619	29	[B2M, CALR, CANX, DHCR7, ELOVL5, EMC1, EMC2, EMC3, ERGIC1, FKBP8, HLA-A, HLA-B, HLA-C, HLA-E, HLA-F, HLA-G, HM13, HSPA5, PIGK, PIGS, PRKD2, RRBP1, SGPL1, STING1, TAP1, TAP2, TAPT1, TMCO1, ZMPSTE24]
GO:0060333	interferon-gamma-mediated signaling pathway	GO_BiologicalProcess-EBI-UniProt-GOA-ACAP-ARAP_13.05.2021_00h00	2.19344e-10	3.29236e-07	21.0526	20	[B2M, CAMK2D, CAMK2G, GBP2, HLA-A, HLA-B, HLA-C, HLA-E, HLA-F, HLA-G, ICAM1, NMI, OAS2, OASL, PARP14, PARP9, PML, STAT1, TRIM21, TRIM22]
GO:0071556	integral component of lumenal side of endoplasmic reticulum membrane	GO_CellularComponent-EBI-UniProt-GOA-ACAP-ARAP_13.05.2021_00h00	1.37548e-07	0.000199445	31.25	10	[CALR, CANX, HLA-A, HLA-B, HLA-C, HLA-E, HLA-F, HLA-G, HM13, PRKD2]
KEGG:05169	Epstein-Barr virus infection	KEGG_13.05.2021	4.81592e-07	0.000687231	11.8812	24	[B2M, BAK1, CALR, HLA-A, HLA-B, HLA-C, HLA-E, HLA-F, HLA-G, ICAM1, IKBKB, ISG15, MAP2K3, NFKB2, OAS2, PSMD6, PSMD7, RIPK1, STAT1, STAT2, STAT3, SYK, TAP1, TAP2]
GO:0050792	regulation of viral process	GO_BiologicalProcess-EBI-UniProt-GOA-ACAP-ARAP_13.05.2021_00h00	1.69185e-08	2.49886e-05	13.2653	26	[ADAR, BST2, CHMP4A, FAM111A, IFI16, IFIT5, ISG15, ISG20, KPNA6, LGALS9, LTF, MX1, OAS2, OASL, PDE12, PLSCR1, PML, RSAD2, SLPI, STAT1, STOM, TMPRSS2, TMPRSS4, TRIM21, TRIM22, VPS37B]
GO:0048525	negative regulation of viral process	GO_BiologicalProcess-EBI-UniProt-GOA-ACAP-ARAP_13.05.2021_00h00	2.74481e-07	0.00039443	17.2043	16	[BST2, FAM111A, IFI16, IFIT5, ISG15, ISG20, LTF, MX1, OAS2, OASL, PLSCR1, PML, RSAD2, SLPI, STAT1, TRIM21]
GO:0051707	response to other organism	GO_BiologicalProcess-EBI-UniProt-GOA-ACAP-ARAP_13.05.2021_00h00	7.02886e-19	1.09229e-15	8.11131	137	[ADAM9, ADAR, ATAD3A, B2M, BAIAP2, BAIAP2L1, BAK1, BPIFB1, BST2, C2, C3, C4A, C4B, C4BPB, CAMK2D, CAMK2G, CASP4, CAV1, CD14, CD47, CD55, CDC42, CFB, CFD, CFI, CFP, CMPK2, CNP, CRISP3, CUL1, DDX60, DHX58, DNAJC3, DTX3L, DUOX2, ECSIT, EPHA2, ERAP1, F3, FLNA, FRK, GBP2, GBP6, GGT7, GHSR, GRN, HERC5, HLA-A, HLA-B, HLA-C, HLA-E, HLA-F, HLA-G, HP, HPR, ICAM1, IFI16, IFI44, IFIH1, IFIT2, IFIT3, IFIT5, I…
GO:1903900	regulation of viral life cycle	GO_BiologicalProcess-EBI-UniProt-GOA-ACAP-ARAP_13.05.2021_00h00	3.54304e-09	5.26849e-06	15.2866	24	[ADAR, BST2, CHMP4A, FAM111A, IFI16, IFIT5, ISG15, ISG20, KPNA6, LGALS9, LTF, MX1, OAS2, OASL, PDE12, PLSCR1, PML, RSAD2, SLPI, TMPRSS2, TMPRSS4, TRIM21, TRIM22, VPS37B]
GO:0002483	antigen processing and presentation of endogenous peptide antigen	GO_BiologicalProcess-EBI-UniProt-GOA-ACAP-ARAP_13.05.2021_00h00	4.09184e-11	6.21142e-08	52.381	11	[B2M, ERAP1, ERAP2, HLA-A, HLA-B, HLA-C, HLA-E, HLA-F, HLA-G, TAP1, TAP2]
GO:0002832	negative regulation of response to biotic stimulus	GO_BiologicalProcess-EBI-UniProt-GOA-ACAP-ARAP_13.05.2021_00h00	7.11917e-08	0.000103869	16.8224	18	[ADAR, DHX58, GRN, HLA-A, HLA-B, HLA-E, HLA-F, HLA-G, IFI16, ISG15, LGALS9, LTF, NMI, PARP14, SERPING1, STAT2, TRIM21, USP18]
GO:0009615	response to virus	GO_BiologicalProcess-EBI-UniProt-GOA-ACAP-ARAP_13.05.2021_00h00	9.83511e-12	1.49887e-08	11.828	44	[ADAR, ATAD3A, BST2, DDX60, DHX58, DNAJC3, DTX3L, DUOX2, FLNA, HERC5, IFI16, IFI44, IFIH1, IFIT2, IFIT3, IFIT5, IKBKB, ISG15, ISG20, ITGB6, LGALS9, MX1, MX2, NMI, NT5C3A, OAS2, OASL, PARP9, PDE12, PHB, PHB2, PLSCR1, PML, POLR3A, RSAD2, SLFN11, STAT1, STAT2, STING1, TLR3, TRIM22, UNC93B1, ZBP1, ZMPSTE24]
GO:0045069	regulation of viral genome replication	GO_BiologicalProcess-EBI-UniProt-GOA-ACAP-ARAP_13.05.2021_00h00	4.5896e-07	0.000655395	17.6471	15	[ADAR, BST2, FAM111A, IFI16, IFIT5, ISG15, ISG20, LTF, MX1, OAS2, OASL, PDE12, PLSCR1, RSAD2, SLPI]
GO:0098542	defense response to other organism	GO_BiologicalProcess-EBI-UniProt-GOA-ACAP-ARAP_13.05.2021_00h00	2.54054e-19	3.95563e-16	8.95062	116	[ADAR, ATAD3A, B2M, BPIFB1, BST2, C2, C3, C4A, C4B, C4BPB, CAMK2D, CAMK2G, CASP4, CD14, CD47, CD55, CDC42, CFB, CFD, CFI, CFP, CRISP3, CUL1, DDX60, DHX58, DNAJC3, DTX3L, ECSIT, EPHA2, ERAP1, F3, FLNA, FRK, GBP2, GBP6, GRN, HERC5, HLA-A, HLA-B, HLA-C, HLA-E, HLA-F, HLA-G, HP, HPR, ICAM1, IFI16, IFIH1, IFIT2, IFIT3, IFIT5, IKBKB, IPO7, ISG15, ISG20, LBP, LCN2, LGALS9, LTF, MUC13, MUC4, MUC5AC, MX1,…
GO:0045071	negative regulation of viral genome replication	GO_BiologicalProcess-EBI-UniProt-GOA-ACAP-ARAP_13.05.2021_00h00	9.36442e-08	0.000136252	23.2143	13	[BST2, FAM111A, IFI16, IFIT5, ISG15, ISG20, LTF, MX1, OAS2, OASL, PLSCR1, RSAD2, SLPI]
GO:0019221	cytokine-mediated signaling pathway	GO_BiologicalProcess-EBI-UniProt-GOA-ACAP-ARAP_13.05.2021_00h00	2.10453e-11	3.20309e-08	8.56808	73	[ADAR, B2M, BST2, CAMK2D, CAMK2G, CANX, CASP4, CAV1, CD70, CDC42, CIB1, CUL1, DUOX2, ECM1, F3, FSCN1, GAB2, GBP2, GRB2, HLA-A, HLA-B, HLA-C, HLA-E, HLA-F, HLA-G, HSP90B1, ICAM1, IFIT2, IFIT3, IFIT5, IKBKB, ISG15, ISG20, LBP, LCN2, MX1, MX2, NMI, NOL3, OAS2, OASL, PARP14, PARP9, PML, PSMA3, PSMB1, PSMB10, PSMB3, PSMB8, PSMB9, PSMD6, PSMD7, PSME2, PTPN1, PTPRJ, RIPK1, RSAD2, S100A8, S100A9, SERPINB…
GO:0045087	innate immune response	GO_BiologicalProcess-EBI-UniProt-GOA-ACAP-ARAP_13.05.2021_00h00	2.67391e-21	4.17932e-18	9.96276	107	[ADAR, ATAD3A, B2M, BPIFB1, BST2, C2, C3, C4A, C4B, C4BPB, CAMK2D, CAMK2G, CASP4, CD14, CD47, CD55, CDC42, CFB, CFD, CFI, CFP, CRISP3, CUL1, DDX60, DHX58, DTX3L, ECSIT, ERAP1, FRK, GBP2, GBP6, GRN, HERC5, HLA-A, HLA-B, HLA-C, HLA-E, HLA-F, HLA-G, ICAM1, IFI16, IFIH1, IFIT2, IFIT3, IFIT5, IKBKB, IPO7, ISG15, ISG20, LBP, LCN2, LGALS9, LTF, MUC13, MUC4, MUC5AC, MX1, MX2, MYO1E, NMI, NUB1, OAS2, OASL…
GO:0042612	MHC class I protein complex	GO_CellularComponent-EBI-UniProt-GOA-ACAP-ARAP_13.05.2021_00h00	2.64921e-08	3.89169e-05	63.6364	7	[B2M, HLA-A, HLA-B, HLA-C, HLA-E, HLA-F, HLA-G]
GO:0051607	defense response to virus	GO_BiologicalProcess-EBI-UniProt-GOA-ACAP-ARAP_13.05.2021_00h00	1.69376e-12	2.59653e-09	13.9706	38	[ADAR, ATAD3A, BST2, DDX60, DHX58, DNAJC3, DTX3L, FLNA, HERC5, IFI16, IFIH1, IFIT2, IFIT3, IFIT5, ISG15, ISG20, MX1, MX2, NT5C3A, OAS2, OASL, PARP9, PDE12, PHB, PHB2, PLSCR1, PML, POLR3A, RSAD2, SLFN11, STAT1, STAT2, STING1, TLR3, TRIM22, UNC93B1, ZBP1, ZMPSTE24]
GO:0034340	response to type I interferon	GO_BiologicalProcess-EBI-UniProt-GOA-ACAP-ARAP_13.05.2021_00h00	2.34318e-14	3.60849e-11	24.7525	25	[ADAR, BST2, GBP2, HLA-A, HLA-B, HLA-C, HLA-E, HLA-F, HLA-G, IFIT2, IFIT3, IFIT5, ISG15, ISG20, MX1, MX2, OAS2, OASL, PSMB8, PTPN1, RSAD2, STAT1, STAT2, USP18, ZBP1]
GO:0034341	response to interferon-gamma	GO_BiologicalProcess-EBI-UniProt-GOA-ACAP-ARAP_13.05.2021_00h00	1.93679e-10	2.90905e-07	14.3541	30	[B2M, BST2, CAMK2D, CAMK2G, CD47, CDC42, GBP2, GBP6, HLA-A, HLA-B, HLA-C, HLA-E, HLA-F, HLA-G, ICAM1, LGALS9, MYO1E, NMI, NUB1, OAS2, OASL, PARP14, PARP9, PDE12, PML, SIRPA, STAT1, TLR3, TRIM21, TRIM22]
GO:0060333	interferon-gamma-mediated signaling pathway	GO_BiologicalProcess-EBI-UniProt-GOA-ACAP-ARAP_13.05.2021_00h00	2.19344e-10	3.29236e-07	21.0526	20	[B2M, CAMK2D, CAMK2G, GBP2, HLA-A, HLA-B, HLA-C, HLA-E, HLA-F, HLA-G, ICAM1, NMI, OAS2, OASL, PARP14, PARP9, PML, STAT1, TRIM21, TRIM22]
GO:0060337	type I interferon signaling pathway	GO_BiologicalProcess-EBI-UniProt-GOA-ACAP-ARAP_13.05.2021_00h00	4.98432e-15	7.69081e-12	26.3158	25	[ADAR, BST2, GBP2, HLA-A, HLA-B, HLA-C, HLA-E, HLA-F, HLA-G, IFIT2, IFIT3, IFIT5, ISG15, ISG20, MX1, MX2, OAS2, OASL, PSMB8, PTPN1, RSAD2, STAT1, STAT2, USP18, ZBP1]
GO:0002682	regulation of immune system process	GO_BiologicalProcess-EBI-UniProt-GOA-ACAP-ARAP_13.05.2021_00h00	1.63007e-10	2.44999e-07	6.62651	121	[ADA, ADAR, AGO1, AGO4, AP3D1, ARPC1A, B2M, BAIAP2, BST1, BST2, C2, C3, C4A, C4B, C4BPB, CALCRL, CALR, CAV1, CD47, CD55, CD70, CDC42, CFB, CFD, CFHR4, CFI, CFP, CIB1, CLPTM1, CUL1, CUL4A, CYFIP2, DDX60, DHX58, DNAJA3, DPP4, DTX3L, ECM1, EIF2B1, ENPP3, ERAP1, EZR, GAB2, GNAI2, GRB2, GRN, HERC5, HLA-A, HLA-B, HLA-C, HLA-E, HLA-F, HLA-G, HSP90AB1, ICAM1, IDO1, IFI16, IKBKB, ISG15, KARS1, LBP, LGALS9…
GO:0045321	leukocyte activation	GO_BiologicalProcess-EBI-UniProt-GOA-ACAP-ARAP_13.05.2021_00h00	2.2811e-18	3.54255e-15	8.47222	122	[ACLY, ADA, ADAM9, AGA, ANPEP, AP3D1, APEH, ASAH1, B2M, BAK1, BST1, BST2, C3, C6orf120, CAV1, CD14, CD151, CD47, CD55, CD70, CDC42, CEACAM21, CFD, CFP, CHI3L1, CLPTM1, CRISP3, CTSS, DDOST, DERA, DNAJA3, DNAJC13, DNAJC3, DPP4, DPP7, ENPP3, ERP44, FRK, GAB2, GGH, GRB2, GRN, HK3, HLA-A, HLA-B, HLA-C, HLA-E, HLA-F, HLA-G, HP, HPR, HPRT1, HSP90AB1, ICAM1, IDO1, ITGAV, ITGB6, KARS1, KPNB1, LBP, LCN2, L…
GO:0002443	leukocyte mediated immunity	GO_BiologicalProcess-EBI-UniProt-GOA-ACAP-ARAP_13.05.2021_00h00	3.55662e-19	5.5341e-16	9.84925	98	[ACLY, AGA, ANPEP, APEH, ASAH1, B2M, BST1, BST2, C2, C3, C4A, C4B, C4BPB, C6orf120, CD14, CD47, CD55, CD70, CEACAM21, CFD, CFI, CFP, CHI3L1, CRISP3, CTSS, DDOST, DERA, DNAJC13, DNAJC3, DPP7, ERP44, FRK, GAB2, GGH, GRN, HK3, HLA-A, HLA-B, HLA-C, HLA-E, HLA-F, HLA-G, HP, HPR, HPRT1, HSP90AB1, ICAM1, ITGAV, KPNB1, LCN2, LGALS9, LTF, MGST1, MOSPD2, MSH6, MYO1G, NCSTN, PARP3, PGLYRP1, PLAU, PNP, PPP3C…
GO:0002684	positive regulation of immune system process	GO_BiologicalProcess-EBI-UniProt-GOA-ACAP-ARAP_13.05.2021_00h00	5.95469e-11	9.00349e-08	7.65262	89	[ADA, AP3D1, ARPC1A, B2M, BAIAP2, BST1, C2, C3, C4A, C4B, C4BPB, CALR, CAV1, CD47, CD55, CD70, CDC42, CFB, CFD, CFHR4, CFI, CFP, CUL1, CYFIP2, DDX60, DHX58, DNAJA3, DPP4, EIF2B1, ENPP3, EZR, GAB2, GRB2, GRN, HLA-A, HLA-B, HLA-E, HLA-F, HLA-G, HSP90AB1, ICAM1, IFI16, IKBKB, KARS1, LBP, LGALS9, MCU, MOSPD2, MUC13, MUC4, MUC5AC, MYO1E, MYO1G, NMI, P2RX4, PARP9, PHB, PHB2, PLSCR1, PRKD2, PSMA3, PSMB1…
GO:0006810	transport	GO_BiologicalProcess-EBI-UniProt-GOA-ACAP-ARAP_13.05.2021_00h00	3.17891e-25	5.0195e-22	6.08033	327	[ABAT, ABCB7, ABCB8, ABCC3, ABCD4, ACACA, ACLY, ACSL3, ACTN1, ACTN2, ADA, ADAM9, AGA, ANPEP, AP3D1, APEH, AQP5, ARPC1A, ARRDC1, ASAH1, ATAD1, ATP5F1C, ATP6V0A2, ATP6V0A4, B2M, BAIAP2, BAK1, BCAP29, BSPRY, BST1, BST2, C2, C3, C4A, C4B, C4BPB, C6orf120, CALCRL, CALR, CAMK2D, CAMK2G, CANX, CASC3, CAV1, CD109, CD14, CD47, CD55, CDC42, CEACAM21, CFD, CFHR4, CFI, CFP, CHI3L1, CHMP4A, CHMP6, CIB1, CLCA4…
GO:0008104	protein localization	GO_BiologicalProcess-EBI-UniProt-GOA-ACAP-ARAP_13.05.2021_00h00	4.04596e-09	6.0123e-06	5.79446	159	[ABAT, ACSL3, ACTN2, ADAM9, AP3D1, ARRDC1, ATAD1, ATP6V0A2, ATP6V0A4, BAIAP2, BCAP29, CALCRL, CALR, CAMK2G, CANX, CAV1, CDC42, CHMP4A, CHMP6, CIB1, COPA, COPB2, CPT1A, CYP51A1, DAG1, DNAJA3, DNAJC13, DPP4, DTX3L, EHD1, EHD4, EMC1, EMC2, EMC3, EPHA2, ERLEC1, EXOC3, EXOC8, EZR, F3, FERMT1, FLNA, FLOT1, FYCO1, GBP2, GET3, GHSR, GIPC1, GLUD1, GNAI2, GNPAT, GPHN, GRPEL1, HADH, HEATR3, HK2, HM13, HSP90…
GO:0016192	vesicle-mediated transport	GO_BiologicalProcess-EBI-UniProt-GOA-ACAP-ARAP_13.05.2021_00h00	6.40367e-23	1.00538e-19	7.74556	179	[ACLY, ACSL3, ACTN1, ACTN2, AGA, ANPEP, AP3D1, APEH, ARPC1A, ASAH1, ATAD1, B2M, BAIAP2, BCAP29, BST1, BST2, C2, C3, C4A, C4B, C4BPB, C6orf120, CALCRL, CALR, CANX, CAV1, CD109, CD14, CD47, CD55, CDC42, CEACAM21, CFD, CFI, CFP, CHI3L1, CHMP4A, CHMP6, COPA, COPB2, CRISP3, CSNK1G3, CTSS, CYFIP2, DDOST, DERA, DNAJC13, DNAJC3, DPP7, DTX3L, ECM1, EHD1, EHD4, ENDOD1, ENPP2, ERGIC1, ERP44, EXOC3, EXOC8, E…
GO:0051649	establishment of localization in cell	GO_BiologicalProcess-EBI-UniProt-GOA-ACAP-ARAP_13.05.2021_00h00	2.23627e-23	3.51542e-20	7.23639	210	[ABCD4, ACACA, ACLY, ACTN1, ACTN2, AGA, ANPEP, AP3D1, APEH, ASAH1, ATAD1, ATP5F1C, B2M, BAK1, BCAP29, BST1, BST2, C3, C6orf120, CALR, CAMK2D, CANX, CASC3, CAV1, CD109, CD14, CD47, CD55, CDC42, CEACAM21, CFD, CFP, CHI3L1, CHMP4A, CHMP6, CIB1, COPA, COPB2, CPSF6, CPT1A, CRISP3, CTSS, DDOST, DERA, DNAJC13, DNAJC3, DPP7, DTX3L, ECM1, EHD1, EHD4, ENDOD1, ERGIC1, ERLEC1, ERP44, EZR, F3, FERMT1, FLNA, F…
GO:0070727	cellular macromolecule localization	GO_BiologicalProcess-EBI-UniProt-GOA-ACAP-ARAP_13.05.2021_00h00	1.45167e-07	0.000210057	5.99583	115	[ACSL3, ACTN2, AP3D1, ATAD1, BCAP29, CALR, CASC3, CAV1, CDC42, CHMP4A, CIB1, COPA, COPB2, DAG1, DNAJA3, DTX3L, EHD1, EHD4, EMC1, EMC2, EMC3, EPHA2, ERLEC1, EXOC3, EXOC8, EZR, FERMT1, FLNA, FLOT1, FYCO1, GBP2, GET3, GHSR, GIPC1, GPHN, GRPEL1, HEATR3, HK2, HM13, HSP90AB1, HSP90B1, HSPA5, IKBKB, IPO4, IPO5, IPO7, IPO8, KATNB1, KPNA1, KPNA5, KPNA6, KPNB1, LMNA, MISP, MYADM, MYO1E, NPC1, NPTN, OPTN, O…
GO:0140352	export from cell	GO_BiologicalProcess-EBI-UniProt-GOA-ACAP-ARAP_13.05.2021_00h00	1.17875e-20	1.84003e-17	8.72483	130	[ABAT, ACLY, ACTN1, ACTN2, ADAM9, AGA, ANPEP, APEH, ASAH1, B2M, BST1, BST2, C3, C6orf120, CAMK2G, CANX, CD109, CD14, CD47, CD55, CEACAM21, CFD, CFP, CHI3L1, CHMP6, CPT1A, CRISP3, CTSS, CYP51A1, DDOST, DERA, DNAJC13, DNAJC3, DPP4, DPP7, ECM1, ENDOD1, ERP44, EXOC3, EXOC8, EZR, F3, FFAR4, FLNA, FRK, GAB2, GGH, GHSR, GIPC1, GLUD1, GNAI2, GRN, HADH, HK3, HLA-B, HLA-C, HLA-F, HP, HPR, HSP90AB1, ITGAV, …
GO:0002274	myeloid leukocyte activation	GO_BiologicalProcess-EBI-UniProt-GOA-ACAP-ARAP_13.05.2021_00h00	5.21816e-22	8.16642e-19	11.8457	86	[ACLY, ADAM9, AGA, ANPEP, APEH, ASAH1, B2M, BST1, BST2, C3, C6orf120, CD14, CD47, CD55, CEACAM21, CFD, CFP, CHI3L1, CRISP3, CTSS, DDOST, DERA, DNAJC13, DNAJC3, DPP7, ENPP3, ERP44, FRK, GAB2, GGH, GRN, HK3, HLA-B, HLA-C, HP, HPR, HSP90AB1, ITGAV, ITGB6, KARS1, KPNB1, LBP, LCN2, LGALS9, LTF, MGST1, MOSPD2, NCSTN, NMI, PGLYRP1, PLAU, PLSCR1, PNP, PRDX4, PRSS8, PSAP, PSMB1, PSMD6, PSMD7, PTPRJ, QPCT,…
GO:0002366	leukocyte activation involved in immune response	GO_BiologicalProcess-EBI-UniProt-GOA-ACAP-ARAP_13.05.2021_00h00	8.46888e-22	1.32453e-18	11.378	90	[ACLY, ADA, AGA, ANPEP, APEH, ASAH1, B2M, BST1, BST2, C3, C6orf120, CD14, CD47, CD55, CEACAM21, CFD, CFP, CHI3L1, CRISP3, CTSS, DDOST, DERA, DNAJC13, DNAJC3, DPP7, ENPP3, ERP44, FRK, GAB2, GGH, GRN, HK3, HLA-B, HLA-C, HLA-F, HP, HPR, HSP90AB1, ICAM1, ITGAV, KARS1, KPNB1, LBP, LCN2, LGALS9, LTF, MGST1, MOSPD2, MSH6, NCSTN, NMI, PARP3, PGLYRP1, PLAU, PNP, PRDX4, PRSS8, PSAP, PSMB1, PSMD6, PSMD7, PT…
GO:0045184	establishment of protein localization	GO_BiologicalProcess-EBI-UniProt-GOA-ACAP-ARAP_13.05.2021_00h00	1.22284e-10	1.83916e-07	6.55567	126	[ABAT, ACSL3, ADAM9, AP3D1, ARRDC1, ATAD1, ATP6V0A2, ATP6V0A4, BCAP29, CALCRL, CALR, CAMK2G, CANX, CAV1, CDC42, CHMP4A, CHMP6, CIB1, COPA, COPB2, CPT1A, CYP51A1, DNAJC13, DPP4, DTX3L, EHD1, EMC1, EMC2, EMC3, ERLEC1, EXOC3, EXOC8, EZR, F3, FERMT1, FLNA, FYCO1, GET3, GIPC1, GLUD1, GNAI2, GRPEL1, HADH, HEATR3, HK2, HM13, HSP90AB1, HSP90B1, HSPA5, IPO4, IPO5, IPO7, IPO8, KATNB1, KPNA1, KPNA5, KPNA6, …
GO:0046907	intracellular transport	GO_BiologicalProcess-EBI-UniProt-GOA-ACAP-ARAP_13.05.2021_00h00	4.1786e-10	6.25119e-07	6.5885	118	[ABCD4, ACACA, ACTN2, AP3D1, ATAD1, ATP5F1C, BCAP29, CALR, CASC3, CD55, CDC42, CHMP4A, CHMP6, CIB1, COPA, COPB2, CPSF6, CPT1A, DNAJC13, DTX3L, EHD1, EHD4, ERGIC1, ERLEC1, EZR, FERMT1, FLNA, FOLR1, FYCO1, GEMIN4, GET3, GIPC1, GRPEL1, HEATR3, HM13, HSP90AB1, HSP90B1, HSPA5, IFT52, IPO4, IPO5, IPO7, IPO8, KATNB1, KIFAP3, KPNA1, KPNA5, KPNA6, KPNB1, LCA5L, LMAN2L, LMNA, MAP2K1, MX2, MYO1B, MYO1D, MYO…
GO:0002444	myeloid leukocyte mediated immunity	GO_BiologicalProcess-EBI-UniProt-GOA-ACAP-ARAP_13.05.2021_00h00	3.77827e-22	5.92055e-19	12.701	79	[ACLY, AGA, ANPEP, APEH, ASAH1, B2M, BST1, BST2, C3, C6orf120, CD14, CD47, CD55, CEACAM21, CFD, CFP, CHI3L1, CRISP3, CTSS, DDOST, DERA, DNAJC13, DNAJC3, DPP7, ERP44, FRK, GAB2, GGH, GRN, HK3, HLA-B, HLA-C, HLA-E, HP, HPR, HSP90AB1, ITGAV, KPNB1, LCN2, LGALS9, LTF, MGST1, MOSPD2, NCSTN, PGLYRP1, PLAU, PNP, PRDX4, PRSS8, PSAP, PSMB1, PSMD6, PSMD7, PTPRJ, QPCT, QSOX1, RAB24, S100A11, S100A12, S100A8…
GO:0031982	vesicle	GO_CellularComponent-EBI-UniProt-GOA-ACAP-ARAP_13.05.2021_00h00	5.6377e-41	8.92447e-38	7.47776	311	[ABHD6, ACLY, ACOT7, ACTN1, ACTN2, ADA, ADAM9, ADGRG1, AGA, AGO2, ALDH1A3, ANPEP, AP3D1, APEH, AQP5, ARHGDIB, ARMC9, ARPC1A, ARRDC1, ASAH1, ATP6V0A2, ATP6V0A4, B2M, BAIAP2, BAIAP2L1, BAIAP2L2, BPIFB1, BST1, BST2, C2, C3, C4A, C4B, C6orf120, CALCRL, CALR, CAMK2D, CAMK2G, CANX, CAPNS1, CAV1, CBR1, CD109, CD14, CD47, CD55, CD70, CD82, CDC42, CEACAM21, CFB, CFD, CFI, CFP, CHI3L1, CHMP4A, CHMP6, CIB1,…
GO:0046903	secretion	GO_BiologicalProcess-EBI-UniProt-GOA-ACAP-ARAP_13.05.2021_00h00	1.16011e-23	1.82718e-20	8.94207	142	[ABAT, ABCC3, ACLY, ACSL3, ACTN1, ACTN2, ADA, ADAM9, AGA, ANPEP, APEH, AQP5, ASAH1, B2M, BST1, BST2, C3, C6orf120, CAMK2G, CANX, CAV1, CD109, CD14, CD47, CD55, CEACAM21, CFD, CFP, CHI3L1, CHMP6, CPT1A, CRISP3, CTSS, CYP51A1, DDOST, DDR1, DERA, DNAJC13, DNAJC3, DPP4, DPP7, ECM1, ENDOD1, ERP44, EXOC3, EXOC8, EZR, F3, FFAR4, FLNA, FRK, GAB2, GGH, GHSR, GIPC1, GLUD1, GNAI2, GOT2, GRN, HADH, HK2, HK3,…
GO:0071702	organic substance transport	GO_BiologicalProcess-EBI-UniProt-GOA-ACAP-ARAP_13.05.2021_00h00	6.68975e-15	1.03089e-11	6.51383	179	[ABAT, ABCB7, ABCC3, ABCD4, ACACA, ACSL3, ADA, ADAM9, AP3D1, AQP5, ARRDC1, ATAD1, ATP6V0A2, ATP6V0A4, BCAP29, C3, CALCRL, CALR, CAMK2G, CANX, CASC3, CAV1, CD47, CDC42, CFHR4, CHMP4A, CHMP6, CIB1, COPA, COPB2, CPSF6, CPT1A, CYP51A1, DENND5B, DNAJC13, DPP4, DTX3L, EHD1, ERLEC1, EXOC3, EXOC8, EZR, F3, FERMT1, FFAR4, FLNA, FLOT1, FOLR1, FYCO1, GET3, GHSR, GIPC1, GLUD1, GNAI2, GOT2, GRPEL1, HADH, HEAT…
GO:0071705	nitrogen compound transport	GO_BiologicalProcess-EBI-UniProt-GOA-ACAP-ARAP_13.05.2021_00h00	5.40271e-12	8.24994e-09	6.45581	149	[ABAT, ABCB7, ACSL3, ADA, ADAM9, AP3D1, ARRDC1, ATAD1, ATP6V0A2, ATP6V0A4, BCAP29, CALCRL, CALR, CAMK2G, CANX, CASC3, CAV1, CD47, CDC42, CHMP4A, CHMP6, CIB1, COPA, COPB2, CPSF6, CPT1A, CYP51A1, DNAJC13, DPP4, DTX3L, EHD1, ERLEC1, EXOC3, EXOC8, EZR, F3, FERMT1, FFAR4, FLNA, FLOT1, FOLR1, FYCO1, GET3, GHSR, GIPC1, GLUD1, GNAI2, GRPEL1, HADH, HEATR3, HM13, HSP90AB1, HSP90B1, HSPA5, IPO4, IPO5, IPO7,…
GO:0031410	cytoplasmic vesicle	GO_CellularComponent-EBI-UniProt-GOA-ACAP-ARAP_13.05.2021_00h00	1.11509e-24	1.75961e-21	7.66224	196	[ABHD6, ACLY, ACTN1, ACTN2, ADA, AGA, ANPEP, AP3D1, APEH, AQP5, ARHGDIB, ASAH1, ATP6V0A2, ATP6V0A4, B2M, BAIAP2, BAIAP2L2, BST1, BST2, C3, C6orf120, CALCRL, CALR, CAMK2D, CAMK2G, CANX, CAV1, CD109, CD14, CD47, CD55, CDC42, CEACAM21, CFD, CFP, CHI3L1, CHMP4A, CHMP6, CNP, COPA, COPB2, CRISP3, CTSS, CTSV, DDOST, DERA, DNAJC13, DNAJC3, DPEP3, DPP4, DPP7, DTX3L, ECE1, ECM1, EHD1, EHD4, ERGIC1, ERP44, …
GO:0002275	myeloid cell activation involved in immune response	GO_BiologicalProcess-EBI-UniProt-GOA-ACAP-ARAP_13.05.2021_00h00	2.03369e-24	3.20713e-21	13.355	82	[ACLY, AGA, ANPEP, APEH, ASAH1, B2M, BST1, BST2, C3, C6orf120, CD14, CD47, CD55, CEACAM21, CFD, CFP, CHI3L1, CRISP3, CTSS, DDOST, DERA, DNAJC13, DNAJC3, DPP7, ENPP3, ERP44, FRK, GAB2, GGH, GRN, HK3, HLA-B, HLA-C, HP, HPR, HSP90AB1, ITGAV, KARS1, KPNB1, LBP, LCN2, LGALS9, LTF, MGST1, MOSPD2, NCSTN, NMI, PGLYRP1, PLAU, PNP, PRDX4, PRSS8, PSAP, PSMB1, PSMD6, PSMD7, PTPRJ, QPCT, QSOX1, RAB24, S100A11…
GO:0006887	exocytosis	GO_BiologicalProcess-EBI-UniProt-GOA-ACAP-ARAP_13.05.2021_00h00	3.52335e-22	5.52461e-19	10.4888	103	[ACLY, ACTN1, ACTN2, AGA, ANPEP, APEH, ASAH1, B2M, BST1, BST2, C3, C6orf120, CD109, CD14, CD47, CD55, CEACAM21, CFD, CFP, CHI3L1, CHMP6, CRISP3, CTSS, DDOST, DERA, DNAJC13, DNAJC3, DPP7, ECM1, ENDOD1, ERP44, EXOC3, EXOC8, F3, FLNA, FRK, GAB2, GGH, GIPC1, GNAI2, GRN, HK3, HLA-B, HLA-C, HLA-F, HP, HPR, HSP90AB1, ITGAV, KPNB1, LCN2, LGALS3BP, LGALS9, LTF, MGST1, MOSPD2, MYO1G, NCS1, NCSTN, PDCD6IP, …
GO:0012506	vesicle membrane	GO_CellularComponent-EBI-UniProt-GOA-ACAP-ARAP_13.05.2021_00h00	6.25501e-11	9.44507e-08	7.47812	94	[ABHD6, ANPEP, AP3D1, AQP5, ATP6V0A2, ATP6V0A4, B2M, BAIAP2L2, BST1, BST2, CALR, CAMK2D, CAMK2G, CAV1, CD109, CD14, CD47, CD55, CEACAM21, CHMP4A, CHMP6, COPA, COPB2, DDOST, DNAJC13, DTX3L, ECE1, EHD1, EHD4, EXOC3, F3, FFAR4, FOLR1, GDE1, GIPC1, GPRC5A, GPRC5C, GRB2, HLA-A, HLA-B, HLA-C, HLA-E, HLA-F, HLA-G, ITGAV, MGST1, MOSPD2, MYO1B, MYO1E, MYO5B, NCDN, NCSTN, NOL3, NPC1, OPTN, PACSIN2, PAM, PD…
GO:0015031	protein transport	GO_BiologicalProcess-EBI-UniProt-GOA-ACAP-ARAP_13.05.2021_00h00	8.57528e-11	1.29229e-07	6.69248	121	[ABAT, ACSL3, ADAM9, AP3D1, ARRDC1, ATAD1, ATP6V0A2, ATP6V0A4, BCAP29, CALCRL, CALR, CAMK2G, CANX, CAV1, CDC42, CHMP4A, CHMP6, CIB1, COPA, COPB2, CPT1A, CYP51A1, DNAJC13, DPP4, DTX3L, EHD1, ERLEC1, EXOC3, EXOC8, EZR, F3, FERMT1, FLNA, FYCO1, GET3, GIPC1, GLUD1, GNAI2, GRPEL1, HADH, HEATR3, HM13, HSP90AB1, HSP90B1, HSPA5, IPO4, IPO5, IPO7, IPO8, KATNB1, KPNA1, KPNA5, KPNA6, KPNB1, LMAN2L, LMNA, LR…
GO:0036230	granulocyte activation	GO_BiologicalProcess-EBI-UniProt-GOA-ACAP-ARAP_13.05.2021_00h00	1.02598e-23	1.61695e-20	13.7255	77	[ACLY, AGA, ANPEP, APEH, ASAH1, B2M, BST1, BST2, C3, C6orf120, CD14, CD47, CD55, CEACAM21, CFD, CFP, CHI3L1, CRISP3, CTSS, DDOST, DERA, DNAJC13, DNAJC3, DPP7, ENPP3, ERP44, FRK, GGH, GRN, HK3, HLA-B, HLA-C, HP, HPR, HSP90AB1, ITGAV, KARS1, KPNB1, LCN2, LTF, MGST1, MOSPD2, NCSTN, PGLYRP1, PLAU, PNP, PRDX4, PRSS8, PSAP, PSMB1, PSMD6, PSMD7, PTPRJ, QPCT, QSOX1, RAB24, S100A11, S100A12, S100A8, S100A…
GO:0098588	bounding membrane of organelle	GO_CellularComponent-EBI-UniProt-GOA-ACAP-ARAP_13.05.2021_00h00	3.99602e-14	6.14588e-11	6.77817	154	[ABCD4, ABHD6, ACSL3, ANPEP, AP3D1, ATAD1, ATP6V0A2, ATP6V0A4, B2M, B3GNT7, BAK1, BST1, BST2, CALR, CAMK2D, CAMK2G, CAV1, CD109, CD14, CD47, CD55, CDC42, CEACAM21, CHMP4A, CHMP6, CHST4, CISD1, CLCC1, CNP, COPA, COPB2, CP, CPT1A, CYB5B, DDOST, DHCR7, DNAJC13, DPP4, DTX3L, ECE1, EHD1, EHD4, ERGIC1, EXOC3, F3, FFAR4, FLOT1, FOLR1, GALNT12, GALNT14, GALNT2, GALNT3, GALNT6, GALNT7, GBP2, GK, GK3P, GLG…
GO:0005768	endosome	GO_CellularComponent-EBI-UniProt-GOA-ACAP-ARAP_13.05.2021_00h00	2.64037e-08	3.88134e-05	7.20461	75	[ABHD6, AP3D1, ASAH1, ATP6V0A2, ATP6V0A4, B2M, BST2, CALCRL, CAV1, CD14, CHMP4A, CHMP6, CTSS, DNAJC13, DTX3L, ECE1, EHD1, EHD4, EXOC8, EZR, F3, FFAR4, FLOT1, FOLR1, FYCO1, GRB2, GRN, HLA-A, HLA-B, HLA-C, HLA-E, HLA-F, HLA-G, LTF, MAP2K1, MYO1B, MYO1D, MYO5B, NCDN, NCSTN, NOL3, NPC1, OPTN, PACSIN2, PDCD6, PHB, PICK1, PML, PRKCI, PSAP, PTPN1, RAB24, RAB35, RAB8A, RIPK1, SLC5A1, SNX17, SQSTM1, STEAP…
GO:0006886	intracellular protein transport	GO_BiologicalProcess-EBI-UniProt-GOA-ACAP-ARAP_13.05.2021_00h00	2.20405e-08	3.24656e-05	7.25339	75	[AP3D1, ATAD1, BCAP29, CALR, CDC42, CHMP4A, CIB1, COPA, COPB2, EHD1, ERLEC1, FERMT1, FLNA, FYCO1, GET3, GIPC1, GRPEL1, HEATR3, HM13, HSP90AB1, HSP90B1, HSPA5, IPO4, IPO5, IPO7, IPO8, KATNB1, KPNA1, KPNA5, KPNA6, KPNB1, LMNA, MYO1E, OXA1L, PDCD6, PHB2, PICK1, PML, PPP3CA, PRKCI, PTPN1, RAB24, RAB35, RAB8A, RPL32, RPS11, SAMM50, SDCBP, SEC63, SEL1L, SLC25A6, SNX17, SPCS2, STAT3, STOM, STXBP2, SURF4…
GO:0099503	secretory vesicle	GO_CellularComponent-EBI-UniProt-GOA-ACAP-ARAP_13.05.2021_00h00	5.26607e-19	8.18873e-16	9.45094	105	[ACLY, ACTN1, ACTN2, AGA, ANPEP, APEH, ASAH1, ATP6V0A2, B2M, BAIAP2, BST1, BST2, C3, C6orf120, CALR, CAV1, CD109, CD14, CD47, CD55, CDC42, CEACAM21, CFD, CFP, CHI3L1, CRISP3, CTSS, CTSV, DDOST, DERA, DNAJC13, DNAJC3, DPEP3, DPP7, ECE1, ECM1, ERP44, EXOC3, F3, FRK, GARS1, GGH, GIPC1, GNAI2, GRN, HK3, HLA-B, HLA-C, HP, HPR, HSP90AB1, ITGAV, KPNB1, LCN2, LGALS3BP, LTF, MGST1, MOSPD2, NCS1, NCSTN, NO…
GO:0030141	secretory granule	GO_CellularComponent-EBI-UniProt-GOA-ACAP-ARAP_13.05.2021_00h00	1.68501e-22	2.64377e-19	10.7333	101	[ACLY, ACTN1, ACTN2, AGA, ANPEP, APEH, ASAH1, ATP6V0A2, B2M, BAIAP2, BST1, BST2, C3, C6orf120, CALR, CAV1, CD109, CD14, CD47, CD55, CDC42, CEACAM21, CFD, CFP, CHI3L1, CRISP3, CTSS, CTSV, DDOST, DERA, DNAJC13, DNAJC3, DPEP3, DPP7, ECE1, ECM1, ERP44, EXOC3, F3, FRK, GARS1, GGH, GNAI2, GRN, HK3, HLA-B, HLA-C, HP, HPR, HSP90AB1, ITGAV, KPNB1, LCN2, LGALS3BP, LTF, MGST1, MOSPD2, NCS1, NCSTN, NOL3, PAM…
GO:0030659	cytoplasmic vesicle membrane	GO_CellularComponent-EBI-UniProt-GOA-ACAP-ARAP_13.05.2021_00h00	1.60212e-09	2.39036e-06	8.08561	68	[ANPEP, AQP5, ATP6V0A2, ATP6V0A4, B2M, BAIAP2L2, BST1, BST2, CALR, CAMK2D, CAMK2G, CAV1, CD109, CD14, CD47, CD55, CEACAM21, CHMP4A, COPA, COPB2, DDOST, DNAJC13, EXOC3, F3, FOLR1, GDE1, GPRC5A, GPRC5C, HLA-A, HLA-B, HLA-C, HLA-E, HLA-F, HLA-G, ITGAV, MGST1, MOSPD2, MYO1E, MYO5B, NCSTN, PACSIN2, PAM, PDCD6, PICK1, PLAU, PRKD2, PSAP, PTPRJ, RAB24, RAB35, RAB8A, SIRPA, SIRPB1, SLCO4C1, SNX17, SPARC, …
GO:0043299	leukocyte degranulation	GO_BiologicalProcess-EBI-UniProt-GOA-ACAP-ARAP_13.05.2021_00h00	2.47272e-23	3.88464e-20	13.255	79	[ACLY, AGA, ANPEP, APEH, ASAH1, B2M, BST1, BST2, C3, C6orf120, CD14, CD47, CD55, CEACAM21, CFD, CFP, CHI3L1, CRISP3, CTSS, DDOST, DERA, DNAJC13, DNAJC3, DPP7, ERP44, FRK, GAB2, GGH, GRN, HK3, HLA-B, HLA-C, HLA-F, HP, HPR, HSP90AB1, ITGAV, KPNB1, LCN2, LGALS9, LTF, MGST1, MOSPD2, NCSTN, PGLYRP1, PLAU, PNP, PRDX4, PRSS8, PSAP, PSMB1, PSMD6, PSMD7, PTPRJ, QPCT, QSOX1, RAB24, S100A11, S100A12, S100A8…
GO:0045055	regulated exocytosis	GO_BiologicalProcess-EBI-UniProt-GOA-ACAP-ARAP_13.05.2021_00h00	2.68086e-21	4.18751e-18	10.8545	94	[ACLY, ACTN1, ACTN2, AGA, ANPEP, APEH, ASAH1, B2M, BST1, BST2, C3, C6orf120, CD109, CD14, CD47, CD55, CEACAM21, CFD, CFP, CHI3L1, CRISP3, CTSS, DDOST, DERA, DNAJC13, DNAJC3, DPP7, ECM1, ENDOD1, ERP44, F3, FLNA, FRK, GAB2, GGH, GIPC1, GNAI2, GRN, HK3, HLA-B, HLA-C, HLA-F, HP, HPR, HSP90AB1, ITGAV, KPNB1, LCN2, LGALS3BP, LGALS9, LTF, MGST1, MOSPD2, NCS1, NCSTN, PGLYRP1, PLAU, PNP, PPP3CB, PRDX4, PR…
GO:0060205	cytoplasmic vesicle lumen	GO_CellularComponent-EBI-UniProt-GOA-ACAP-ARAP_13.05.2021_00h00	1.06435e-15	1.64442e-12	13.6986	50	[ACLY, ACTN1, ACTN2, ADA, AGA, B2M, C3, C6orf120, CFD, CFP, CHI3L1, CRISP3, DERA, DNAJC3, DPP7, ECM1, ERP44, F3, FRK, GGH, GNAI2, GRN, HK3, HP, HPR, HSP90AB1, KPNB1, LCN2, LGALS3BP, LTF, PGLYRP1, PNP, PRDX4, PRSS8, PSMB1, PSMD6, PSMD7, QPCT, QSOX1, S100A11, S100A12, S100A8, S100A9, SDCBP, SERPINB1, SERPING1, SLPI, SPARC, TCN1, TIMP1]
GO:0030667	secretory granule membrane	GO_CellularComponent-EBI-UniProt-GOA-ACAP-ARAP_13.05.2021_00h00	1.30203e-08	1.92441e-05	10.6509	36	[ANPEP, BST1, BST2, CAV1, CD109, CD14, CD47, CD55, CEACAM21, DDOST, DNAJC13, EXOC3, HLA-B, HLA-C, ITGAV, MGST1, MOSPD2, NCSTN, PAM, PLAU, PSAP, PTPRJ, RAB24, SIRPA, SIRPB1, SLCO4C1, SPARC, STBD1, STING1, STOM, SURF4, TCIRG1, TMED2, TMED7-TICAM2, VNN1, VPS35L]
GO:0042581	specific granule	GO_CellularComponent-EBI-UniProt-GOA-ACAP-ARAP_13.05.2021_00h00	2.3146e-10	3.47189e-07	15.6069	27	[B2M, BST1, CD47, CEACAM21, CFP, CHI3L1, CRISP3, ERP44, FRK, GGH, HP, HPR, ITGAV, KPNB1, LCN2, LTF, MOSPD2, PGLYRP1, PLAU, PTPRJ, QPCT, QSOX1, SLCO4C1, SLPI, STOM, STXBP2, TCN1]
GO:0043312	neutrophil degranulation	GO_BiologicalProcess-EBI-UniProt-GOA-ACAP-ARAP_13.05.2021_00h00	1.55235e-23	2.4434e-20	13.9405	75	[ACLY, AGA, ANPEP, APEH, ASAH1, B2M, BST1, BST2, C3, C6orf120, CD14, CD47, CD55, CEACAM21, CFD, CFP, CHI3L1, CRISP3, CTSS, DDOST, DERA, DNAJC13, DNAJC3, DPP7, ERP44, FRK, GGH, GRN, HK3, HLA-B, HLA-C, HP, HPR, HSP90AB1, ITGAV, KPNB1, LCN2, LTF, MGST1, MOSPD2, NCSTN, PGLYRP1, PLAU, PNP, PRDX4, PRSS8, PSAP, PSMB1, PSMD6, PSMD7, PTPRJ, QPCT, QSOX1, RAB24, S100A11, S100A12, S100A8, S100A9, SDCBP, SERP…
GO:0042582	azurophil granule	GO_CellularComponent-EBI-UniProt-GOA-ACAP-ARAP_13.05.2021_00h00	4.92902e-07	0.000702878	12.6437	22	[ACLY, AGA, BST2, C3, C6orf120, DDOST, DNAJC13, DNAJC3, DPP7, FRK, GGH, GRN, MGST1, NCSTN, PRSS8, PSAP, SDCBP, SLCO4C1, STOM, STXBP2, SURF4, VNN1]
GO:0035580	specific granule lumen	GO_CellularComponent-EBI-UniProt-GOA-ACAP-ARAP_13.05.2021_00h00	3.65958e-10	5.48206e-07	24.6377	17	[B2M, CFP, CHI3L1, CRISP3, ERP44, FRK, GGH, HP, HPR, KPNB1, LCN2, LTF, PGLYRP1, QPCT, QSOX1, SLPI, TCN1]
GO:1904724	tertiary granule lumen	GO_CellularComponent-EBI-UniProt-GOA-ACAP-ARAP_13.05.2021_00h00	3.35581e-07	0.000480888	20.9677	13	[ASAH1, B2M, CFP, CRISP3, CTSS, GGH, HP, HPR, LTF, PGLYRP1, QPCT, QSOX1, TCN1]
GO:0048518	positive regulation of biological process	GO_BiologicalProcess-EBI-UniProt-GOA-ACAP-ARAP_13.05.2021_00h00	3.19656e-07	0.000458387	4.68345	307	[ABAT, ABCB7, ABHD6, ACACA, ACLY, ACSL3, ACTN1, ACTN2, ADA, ADAM9, ADAR, ADGRG1, AGO1, AGO2, AGO4, ALDH1A3, ANAPC4, AP3D1, ARHGEF10L, ARMC9, ARPC1A, ASNS, ATAD1, B2M, BAIAP2, BAIAP2L1, BAIAP2L2, BAK1, BST1, BST2, C2, C20orf27, C3, C4A, C4B, C4BPB, CALCRL, CALR, CAMK2D, CAPNS1, CASP10, CASP4, CASP5, CAV1, CBR1, CCNT2, CD14, CD47, CD55, CD70, CDC42, CFB, CFD, CFHR4, CFI, CFP, CHD1L, CHEK1, CHI3L1, …
GO:0002682	regulation of immune system process	GO_BiologicalProcess-EBI-UniProt-GOA-ACAP-ARAP_13.05.2021_00h00	1.63007e-10	2.44999e-07	6.62651	121	[ADA, ADAR, AGO1, AGO4, AP3D1, ARPC1A, B2M, BAIAP2, BST1, BST2, C2, C3, C4A, C4B, C4BPB, CALCRL, CALR, CAV1, CD47, CD55, CD70, CDC42, CFB, CFD, CFHR4, CFI, CFP, CIB1, CLPTM1, CUL1, CUL4A, CYFIP2, DDX60, DHX58, DNAJA3, DPP4, DTX3L, ECM1, EIF2B1, ENPP3, ERAP1, EZR, GAB2, GNAI2, GRB2, GRN, HERC5, HLA-A, HLA-B, HLA-C, HLA-E, HLA-F, HLA-G, HSP90AB1, ICAM1, IDO1, IFI16, IKBKB, ISG15, KARS1, LBP, LGALS9…
GO:0045321	leukocyte activation	GO_BiologicalProcess-EBI-UniProt-GOA-ACAP-ARAP_13.05.2021_00h00	2.2811e-18	3.54255e-15	8.47222	122	[ACLY, ADA, ADAM9, AGA, ANPEP, AP3D1, APEH, ASAH1, B2M, BAK1, BST1, BST2, C3, C6orf120, CAV1, CD14, CD151, CD47, CD55, CD70, CDC42, CEACAM21, CFD, CFP, CHI3L1, CLPTM1, CRISP3, CTSS, DDOST, DERA, DNAJA3, DNAJC13, DNAJC3, DPP4, DPP7, ENPP3, ERP44, FRK, GAB2, GGH, GRB2, GRN, HK3, HLA-A, HLA-B, HLA-C, HLA-E, HLA-F, HLA-G, HP, HPR, HPRT1, HSP90AB1, ICAM1, IDO1, ITGAV, ITGB6, KARS1, KPNB1, LBP, LCN2, L…
GO:0002684	positive regulation of immune system process	GO_BiologicalProcess-EBI-UniProt-GOA-ACAP-ARAP_13.05.2021_00h00	5.95469e-11	9.00349e-08	7.65262	89	[ADA, AP3D1, ARPC1A, B2M, BAIAP2, BST1, C2, C3, C4A, C4B, C4BPB, CALR, CAV1, CD47, CD55, CD70, CDC42, CFB, CFD, CFHR4, CFI, CFP, CUL1, CYFIP2, DDX60, DHX58, DNAJA3, DPP4, EIF2B1, ENPP3, EZR, GAB2, GRB2, GRN, HLA-A, HLA-B, HLA-E, HLA-F, HLA-G, HSP90AB1, ICAM1, IFI16, IKBKB, KARS1, LBP, LGALS9, MCU, MOSPD2, MUC13, MUC4, MUC5AC, MYO1E, MYO1G, NMI, P2RX4, PARP9, PHB, PHB2, PLSCR1, PRKD2, PSMA3, PSMB1…
GO:0006952	defense response	GO_BiologicalProcess-EBI-UniProt-GOA-ACAP-ARAP_13.05.2021_00h00	8.36508e-17	1.29491e-13	7.38721	149	[ADA, ADAR, ATAD3A, B2M, BPIFB1, BST1, BST2, C2, C3, C4A, C4B, C4BPB, CALCRL, CAMK2D, CAMK2G, CASP4, CASP5, CD14, CD47, CD55, CDC42, CFB, CFD, CFI, CFP, CHI3L1, CHST4, CRISP3, CUL1, DDX60, DHX58, DNAJC3, DPP4, DTX3L, DUOX2, ECM1, ECSIT, EIF4G1, ENPP3, EPHA2, ERAP1, F3, FFAR4, FLNA, FRK, GARS1, GBP2, GBP6, GHSR, GNAI2, GRN, HERC5, HLA-A, HLA-B, HLA-C, HLA-E, HLA-F, HLA-G, HP, HPR, ICAM1, IFI16, IF…
GO:0010033	response to organic substance	GO_BiologicalProcess-EBI-UniProt-GOA-ACAP-ARAP_13.05.2021_00h00	1.57807e-15	2.43655e-12	6.14383	217	[ABAT, ABCD4, ACACA, ACSL3, ACTN2, ADA, ADAM9, ADAR, ASAH1, ASNS, ATP6V0A2, ATP6V0A4, B2M, BAIAP2, BAIAP2L1, BAK1, BSPRY, BST2, C20orf27, C4B, CALCRL, CALR, CAMK2D, CAMK2G, CANX, CASP4, CASP6, CAV1, CD109, CD14, CD47, CD55, CD70, CDC42, CHI3L1, CIB1, CLDN4, CMPK2, CNP, CPT1A, CTSS, CTSV, CUL1, CYFIP2, DAG1, DAXX, DDOST, DNAJB11, DNAJC3, DPEP2, DPEP3, DUOX2, ECM1, EHD1, EHD4, EIF2B1, EPHA2, EPS8, …
GO:0019884	antigen processing and presentation of exogenous antigen	GO_BiologicalProcess-EBI-UniProt-GOA-ACAP-ARAP_13.05.2021_00h00	3.50548e-09	5.21616e-06	13.8462	27	[AP3D1, B2M, CALR, CANX, CTSS, CTSV, HLA-A, HLA-B, HLA-C, HLA-E, HLA-F, HLA-G, IKBKB, ITGAV, KIFAP3, KLC1, PSMA3, PSMB1, PSMB10, PSMB3, PSMB8, PSMB9, PSMD6, PSMD7, PSME2, TAP1, TAP2]
GO:0023056	positive regulation of signaling	GO_BiologicalProcess-EBI-UniProt-GOA-ACAP-ARAP_13.05.2021_00h00	6.35536e-07	0.000902462	5.89485	111	[ABAT, ADA, ADAM9, ADGRG1, ARMC9, BAIAP2, BAK1, BST2, C20orf27, C3, CALR, CASP10, CASP4, CAV1, CD14, CDC42, CHI3L1, CIB1, CSNK1G3, CYFIP2, DAXX, DDX60, DHX58, DPEP2, ECE1, ECM1, F3, FERMT1, FFAR4, FKBP8, FLNA, FLOT1, GAB2, GHSR, GIPC1, GLUD1, GNAI2, GRB2, HSP90AB1, ICAM1, IFIT5, IKBKB, ITGAV, LBP, LGALS9, LRRC8A, LTF, MAP2K1, MAP2K3, MCU, MYO1E, NCSTN, NMI, NOL3, NPTN, OASL, P2RX4, PARP14, PARP9,…
GO:0033554	cellular response to stress	GO_BiologicalProcess-EBI-UniProt-GOA-ACAP-ARAP_13.05.2021_00h00	3.91042e-10	5.8539e-07	6.26715	137	[AQP5, ARHGEF10L, ASNS, B2M, BAG1, BAK1, CALR, CAMK2D, CAMK2G, CANX, CASP4, CAV1, CBS, CBSL, CDC42, CHD1L, CHD2, CHEK1, CIB1, CTSV, CUL1, CUL4A, DAG1, DAXX, DNAJB11, DNAJC3, DNPEP, DTX3L, EIF4G1, EPHA2, ERLEC1, ERMP1, ERP44, EYA3, EZR, F3, FAM111A, FBXO6, FLNA, FLOT1, FOLR1, FSCN1, GFPT1, GRB2, GRN, HK2, HLA-G, HM13, HSP90AB1, HSP90B1, HSPA5, ICAM1, IFI16, IKBKB, ISG15, LAMC1, LCN2, LGALS9, LMNA,…
GO:0048002	antigen processing and presentation of peptide antigen	GO_BiologicalProcess-EBI-UniProt-GOA-ACAP-ARAP_13.05.2021_00h00	1.96501e-09	2.92983e-06	13.7931	28	[B2M, CALR, CANX, CTSS, CTSV, ERAP1, ERAP2, HLA-A, HLA-B, HLA-C, HLA-E, HLA-F, HLA-G, IKBKB, ITGAV, KIFAP3, KLC1, PSMA3, PSMB1, PSMB10, PSMB3, PSMB8, PSMB9, PSMD6, PSMD7, PSME2, TAP1, TAP2]
GO:0048584	positive regulation of response to stimulus	GO_BiologicalProcess-EBI-UniProt-GOA-ACAP-ARAP_13.05.2021_00h00	5.01578e-08	7.33808e-05	5.74666	142	[ADA, ADAM9, ADGRG1, ARMC9, ARPC1A, B2M, BAIAP2, BAK1, BST2, C2, C20orf27, C3, C4A, C4B, C4BPB, CALR, CASP10, CASP4, CAV1, CD14, CD47, CD55, CDC42, CFB, CFD, CFHR4, CFI, CFP, CHI3L1, CIB1, CLDN4, CSNK1G3, CUL1, CYFIP2, DAXX, DDX60, DHX58, DPEP2, DTX3L, DUOX2, ECM1, EIF2B1, EYA3, EZR, F3, FERMT1, FFAR4, FKBP8, FLNA, FLOT1, GAB2, GHSR, GIPC1, GNAI2, GRB2, GRN, HLA-A, HLA-B, HLA-E, HLA-F, HLA-G, HSP…
GO:0048585	negative regulation of response to stimulus	GO_BiologicalProcess-EBI-UniProt-GOA-ACAP-ARAP_13.05.2021_00h00	5.52827e-07	0.00078612	5.89155	113	[ABAT, ADA, ADAR, ARRDC1, BPIFB1, C4BPB, CALCRL, CALR, CAV1, CD109, CD14, CD47, CD55, CDC42, CHMP6, CIB1, DAG1, DHX58, DNAJC3, DPP4, ECM1, ENPP3, EPHA2, EYA3, EZR, F3, FERMT1, FFAR4, FSTL1, GARS1, GGT7, GHSR, GLG1, GNAI2, GPRC5A, GRB2, GRN, HLA-A, HLA-B, HLA-E, HLA-F, HLA-G, HSPA5, ICAM1, IFI16, ISG15, ITGA6, ITGAV, LGALS9, LMNA, LPCAT3, LTF, MAP2K3, MVK, MYADM, NMI, NOL3, NOMO3, OPTN, OTUD7A, OT…
GO:0051707	response to other organism	GO_BiologicalProcess-EBI-UniProt-GOA-ACAP-ARAP_13.05.2021_00h00	7.02886e-19	1.09229e-15	8.11131	137	[ADAM9, ADAR, ATAD3A, B2M, BAIAP2, BAIAP2L1, BAK1, BPIFB1, BST2, C2, C3, C4A, C4B, C4BPB, CAMK2D, CAMK2G, CASP4, CAV1, CD14, CD47, CD55, CDC42, CFB, CFD, CFI, CFP, CMPK2, CNP, CRISP3, CUL1, DDX60, DHX58, DNAJC3, DTX3L, DUOX2, ECSIT, EPHA2, ERAP1, F3, FLNA, FRK, GBP2, GBP6, GGT7, GHSR, GRN, HERC5, HLA-A, HLA-B, HLA-C, HLA-E, HLA-F, HLA-G, HP, HPR, ICAM1, IFI16, IFI44, IFIH1, IFIT2, IFIT3, IFIT5, I…
GO:0070887	cellular response to chemical stimulus	GO_BiologicalProcess-EBI-UniProt-GOA-ACAP-ARAP_13.05.2021_00h00	1.13345e-12	1.73871e-09	5.87234	207	[ABCD4, ACACA, ACTN2, ADAM9, ADAR, AQP5, ASAH1, ASNS, ATP6V0A2, ATP6V0A4, B2M, BAIAP2, BAIAP2L1, BAK1, BSPRY, BST1, BST2, C20orf27, CALCRL, CALR, CAMK2D, CAMK2G, CANX, CASP4, CASP6, CAV1, CBR3, CD109, CD14, CD47, CD55, CD70, CDC42, CHI3L1, CIB1, CMPK2, CPT1A, CTSS, CUL1, CYB5B, CYFIP2, CYP2J2, DAG1, DAXX, DNAJB11, DNAJC3, DPEP2, DPP4, DUOX2, ECM1, EHD1, EHD4, EPHA2, EPS8, ERMP1, EZR, F3, FERMT1, …
GO:0002831	regulation of response to biotic stimulus	GO_BiologicalProcess-EBI-UniProt-GOA-ACAP-ARAP_13.05.2021_00h00	8.21093e-12	1.25299e-08	11.036	49	[ADAR, CD55, CUL1, DDX60, DHX58, DTX3L, ERAP1, GRN, HERC5, HLA-A, HLA-B, HLA-E, HLA-F, HLA-G, IFI16, IKBKB, ISG15, LBP, LGALS9, LTF, MUC13, MUC4, MUC5AC, NMI, OASL, OPTN, PARP14, PARP9, PLSCR1, PSMA3, PSMB1, PSMB10, PSMB3, PSMB8, PSMB9, PSMD6, PSMD7, PSME2, PTPN1, SERPING1, STAT1, STAT2, STING1, SYK, TIGAR, TRIM21, USP18, ZBP1, ZMPSTE24]
GO:0032101	regulation of response to external stimulus	GO_BiologicalProcess-EBI-UniProt-GOA-ACAP-ARAP_13.05.2021_00h00	2.06082e-08	3.03971e-05	6.85039	87	[ABAT, ADA, ADAR, BST1, C3, CALCRL, CALR, CASP4, CASP5, CAV1, CD109, CD47, CD55, CUL1, DDX60, DHX58, DPP4, DTX3L, ENPP3, ERAP1, F3, FFAR4, FLNA, GHSR, GNAI2, GRN, HERC5, HLA-A, HLA-B, HLA-E, HLA-F, HLA-G, IFI16, IKBKB, ISG15, KARS1, LBP, LGALS9, LPCAT3, LTF, MAP2K1, MCU, MOSPD2, MUC13, MUC4, MUC5AC, MVK, NMI, OASL, OPTN, P2RX4, PARP14, PARP9, PGLYRP1, PIK3AP1, PLAT, PLAU, PLSCR1, PRKD2, PSMA3, PS…
GO:0050776	regulation of immune response	GO_BiologicalProcess-EBI-UniProt-GOA-ACAP-ARAP_13.05.2021_00h00	3.13298e-09	4.66501e-06	7.1025	88	[ADA, ADAR, ARPC1A, B2M, BAIAP2, C2, C3, C4A, C4B, C4BPB, CALCRL, CD47, CD55, CDC42, CFB, CFD, CFHR4, CFI, CFP, CUL1, CYFIP2, DHX58, DTX3L, ECM1, EIF2B1, ENPP3, ERAP1, EZR, GAB2, GNAI2, GRB2, GRN, HERC5, HLA-A, HLA-B, HLA-C, HLA-E, HLA-F, HLA-G, HSP90AB1, ICAM1, IFI16, IKBKB, ISG15, KARS1, LBP, LGALS9, MUC13, MUC4, MUC5AC, MYO1E, MYO1G, NMI, PARP14, PARP3, PARP9, PGLYRP1, PHB, PHB2, PLSCR1, PPP3C…
GO:0080134	regulation of response to stress	GO_BiologicalProcess-EBI-UniProt-GOA-ACAP-ARAP_13.05.2021_00h00	2.07892e-11	3.16619e-08	6.9697	115	[ABAT, ADA, ADAR, B2M, BAG1, BAK1, BST1, C3, CALCRL, CAMK2D, CAMK2G, CASP4, CASP5, CAV1, CD109, CD47, CDC42, CHEK1, CLDN4, CUL1, CUL4A, DHX58, DNAJC3, DTX3L, DUOX2, EIF4G1, ENPP3, ERAP1, EYA3, EZR, F3, FERMT1, FFAR4, FLNA, GGT7, GHSR, GNAI2, GRN, HERC5, HLA-A, HLA-B, HLA-E, HLA-F, HLA-G, HSP90AB1, HSPA5, IFI16, IKBKB, ISG15, KARS1, LBP, LGALS9, LMNA, LPCAT3, MAP2K1, MUC13, MUC4, MUC5AC, MVK, NMI,…
GO:0002474	antigen processing and presentation of peptide antigen via MHC class I	GO_BiologicalProcess-EBI-UniProt-GOA-ACAP-ARAP_13.05.2021_00h00	3.26952e-13	5.02198e-10	23.301	24	[B2M, CALR, CANX, ERAP1, ERAP2, HLA-A, HLA-B, HLA-C, HLA-E, HLA-F, HLA-G, IKBKB, ITGAV, PSMA3, PSMB1, PSMB10, PSMB3, PSMB8, PSMB9, PSMD6, PSMD7, PSME2, TAP1, TAP2]
GO:0002832	negative regulation of response to biotic stimulus	GO_BiologicalProcess-EBI-UniProt-GOA-ACAP-ARAP_13.05.2021_00h00	7.11917e-08	0.000103869	16.8224	18	[ADAR, DHX58, GRN, HLA-A, HLA-B, HLA-E, HLA-F, HLA-G, IFI16, ISG15, LGALS9, LTF, NMI, PARP14, SERPING1, STAT2, TRIM21, USP18]
GO:0002833	positive regulation of response to biotic stimulus	GO_BiologicalProcess-EBI-UniProt-GOA-ACAP-ARAP_13.05.2021_00h00	4.48903e-07	0.000641482	10.5072	29	[CUL1, DDX60, DHX58, GRN, HLA-E, HLA-F, HLA-G, IFI16, IKBKB, LBP, MUC13, MUC4, MUC5AC, NMI, OASL, PARP9, PLSCR1, PSMA3, PSMB1, PSMB10, PSMB3, PSMB8, PSMB9, PSMD6, PSMD7, PSME2, STING1, SYK, ZBP1]
GO:0007166	cell surface receptor signaling pathway	GO_BiologicalProcess-EBI-UniProt-GOA-ACAP-ARAP_13.05.2021_00h00	6.14348e-07	0.000872988	5.24134	177	[ABAT, ACTN2, ADA, ADAM9, ADAR, ADGRF1, ADGRG1, AGO1, AGO2, AGO4, ARMC9, ARPC1A, ARRDC1, ATP6V0A2, ATP6V0A4, B2M, BAG1, BAIAP2, BAIAP2L1, BAK1, BCL2L14, BST1, BST2, C20orf27, C3, CALCRL, CAMK2D, CAMK2G, CANX, CASP10, CASP4, CAV1, CD109, CD14, CD47, CD55, CD70, CDC42, CFD, CHMP6, CIB1, CSNK1G3, CUL1, CYFIP2, DAXX, DDR1, DLGAP4, DPEP2, DTX3L, DUOX2, ECM1, EFEMP1, EIF2B1, EPHA2, EYA3, EZR, F3, FERMT…
GO:0009615	response to virus	GO_BiologicalProcess-EBI-UniProt-GOA-ACAP-ARAP_13.05.2021_00h00	9.83511e-12	1.49887e-08	11.828	44	[ADAR, ATAD3A, BST2, DDX60, DHX58, DNAJC3, DTX3L, DUOX2, FLNA, HERC5, IFI16, IFI44, IFIH1, IFIT2, IFIT3, IFIT5, IKBKB, ISG15, ISG20, ITGB6, LGALS9, MX1, MX2, NMI, NT5C3A, OAS2, OASL, PARP9, PDE12, PHB, PHB2, PLSCR1, PML, POLR3A, RSAD2, SLFN11, STAT1, STAT2, STING1, TLR3, TRIM22, UNC93B1, ZBP1, ZMPSTE24]
GO:0032103	positive regulation of response to external stimulus	GO_BiologicalProcess-EBI-UniProt-GOA-ACAP-ARAP_13.05.2021_00h00	2.5091e-08	3.6934e-05	8.82353	48	[C3, CALR, CD47, CUL1, DDX60, DHX58, F3, FLNA, GHSR, GRN, HLA-E, HLA-F, HLA-G, IFI16, IKBKB, KARS1, LBP, LGALS9, MCU, MOSPD2, MUC13, MUC4, MUC5AC, NMI, OASL, OPTN, P2RX4, PARP9, PLSCR1, PRKD2, PSMA3, PSMB1, PSMB10, PSMB3, PSMB8, PSMB9, PSMD6, PSMD7, PSME2, RIPK1, S100A12, S100A8, S100A9, STING1, STK39, SYK, TLR3, ZBP1]
GO:0034097	response to cytokine	GO_BiologicalProcess-EBI-UniProt-GOA-ACAP-ARAP_13.05.2021_00h00	5.37409e-17	8.33522e-14	8.59375	110	[ABCD4, ADAM9, ADAR, ASAH1, B2M, BSPRY, BST2, CAMK2D, CAMK2G, CANX, CASP4, CAV1, CD14, CD47, CD70, CDC42, CHI3L1, CIB1, CUL1, DDOST, DUOX2, ECM1, EPS8, F3, FSCN1, GAB2, GBP2, GBP6, GFPT2, GGT7, GIPC1, GRB2, HK2, HLA-A, HLA-B, HLA-C, HLA-E, HLA-F, HLA-G, HSP90AB1, HSP90B1, HSPA5, ICAM1, IFI16, IFIH1, IFIT2, IFIT3, IFIT5, IKBKB, ISG15, ISG20, LBP, LCN2, LGALS9, MCM7, MX1, MX2, MYO1E, NFKB2, NMI, NO…
GO:0050778	positive regulation of immune response	GO_BiologicalProcess-EBI-UniProt-GOA-ACAP-ARAP_13.05.2021_00h00	3.22242e-08	4.72084e-05	7.6555	64	[ADA, ARPC1A, B2M, BAIAP2, C2, C3, C4A, C4B, C4BPB, CD47, CD55, CDC42, CFB, CFD, CFHR4, CFI, CFP, CUL1, CYFIP2, EIF2B1, EZR, GAB2, GRB2, GRN, HLA-A, HLA-B, HLA-E, HLA-F, HLA-G, HSP90AB1, IFI16, IKBKB, KARS1, LBP, LGALS9, MUC13, MUC4, MUC5AC, MYO1E, MYO1G, NMI, PARP9, PHB, PHB2, PLSCR1, PRKD2, PSMA3, PSMB1, PSMB10, PSMB3, PSMB8, PSMB9, PSMD6, PSMD7, PSME2, PTPRJ, RSAD2, SERPING1, SPNS1, STING1, SY…
GO:0071310	cellular response to organic substance	GO_BiologicalProcess-EBI-UniProt-GOA-ACAP-ARAP_13.05.2021_00h00	1.06212e-12	1.63036e-09	6.16984	178	[ABCD4, ACACA, ACTN2, ADAM9, ADAR, ASAH1, ASNS, ATP6V0A2, ATP6V0A4, B2M, BAIAP2, BAIAP2L1, BAK1, BSPRY, BST2, C20orf27, CALCRL, CALR, CAMK2D, CAMK2G, CANX, CASP4, CASP6, CAV1, CD109, CD14, CD47, CD55, CD70, CDC42, CHI3L1, CIB1, CMPK2, CPT1A, CTSS, CUL1, CYFIP2, DAG1, DAXX, DNAJB11, DNAJC3, DPEP2, DUOX2, ECM1, EHD1, EHD4, EPS8, ERMP1, EZR, F3, FERMT1, FKBP8, FLNA, FLOT1, FOLR1, FSCN1, FSTL1, GAB2,…
GO:0098542	defense response to other organism	GO_BiologicalProcess-EBI-UniProt-GOA-ACAP-ARAP_13.05.2021_00h00	2.54054e-19	3.95563e-16	8.95062	116	[ADAR, ATAD3A, B2M, BPIFB1, BST2, C2, C3, C4A, C4B, C4BPB, CAMK2D, CAMK2G, CASP4, CD14, CD47, CD55, CDC42, CFB, CFD, CFI, CFP, CRISP3, CUL1, DDX60, DHX58, DNAJC3, DTX3L, ECSIT, EPHA2, ERAP1, F3, FLNA, FRK, GBP2, GBP6, GRN, HERC5, HLA-A, HLA-B, HLA-C, HLA-E, HLA-F, HLA-G, HP, HPR, ICAM1, IFI16, IFIH1, IFIT2, IFIT3, IFIT5, IKBKB, IPO7, ISG15, ISG20, LBP, LCN2, LGALS9, LTF, MUC13, MUC4, MUC5AC, MX1,…
GO:0002253	activation of immune response	GO_BiologicalProcess-EBI-UniProt-GOA-ACAP-ARAP_13.05.2021_00h00	4.22306e-07	0.000604319	7.94913	50	[ADA, ARPC1A, BAIAP2, C2, C3, C4A, C4B, C4BPB, CD47, CD55, CDC42, CFB, CFD, CFHR4, CFI, CFP, CUL1, CYFIP2, EIF2B1, EZR, GRB2, HLA-A, HSP90AB1, IFI16, IKBKB, MUC13, MUC4, MUC5AC, MYO1E, MYO1G, PHB, PHB2, PLSCR1, PRKD2, PSMA3, PSMB1, PSMB10, PSMB3, PSMB8, PSMB9, PSMD6, PSMD7, PSME2, PTPRJ, SERPING1, SPNS1, STING1, SYK, THY1, ZBP1]
GO:0031347	regulation of defense response	GO_BiologicalProcess-EBI-UniProt-GOA-ACAP-ARAP_13.05.2021_00h00	1.9286e-08	2.84662e-05	7.56396	68	[ADA, ADAR, BST1, C3, CALCRL, CASP4, CASP5, CD47, CUL1, DHX58, DTX3L, ENPP3, ERAP1, FFAR4, GHSR, GNAI2, GRN, HERC5, HLA-A, HLA-B, HLA-E, HLA-F, HLA-G, IFI16, IKBKB, ISG15, KARS1, LBP, LGALS9, LPCAT3, MUC13, MUC4, MUC5AC, MVK, NMI, OPTN, PARP14, PARP9, PGLYRP1, PIK3AP1, PLSCR1, PSMA3, PSMB1, PSMB10, PSMB3, PSMB8, PSMB9, PSMD6, PSMD7, PSME2, PTPN1, RIPK1, S100A12, S100A8, S100A9, SERPING1, SIRPA, S…
GO:0019221	cytokine-mediated signaling pathway	GO_BiologicalProcess-EBI-UniProt-GOA-ACAP-ARAP_13.05.2021_00h00	2.10453e-11	3.20309e-08	8.56808	73	[ADAR, B2M, BST2, CAMK2D, CAMK2G, CANX, CASP4, CAV1, CD70, CDC42, CIB1, CUL1, DUOX2, ECM1, F3, FSCN1, GAB2, GBP2, GRB2, HLA-A, HLA-B, HLA-C, HLA-E, HLA-F, HLA-G, HSP90B1, ICAM1, IFIT2, IFIT3, IFIT5, IKBKB, ISG15, ISG20, LBP, LCN2, MX1, MX2, NMI, NOL3, OAS2, OASL, PARP14, PARP9, PML, PSMA3, PSMB1, PSMB10, PSMB3, PSMB8, PSMB9, PSMD6, PSMD7, PSME2, PTPN1, PTPRJ, RIPK1, RSAD2, S100A8, S100A9, SERPINB…
GO:0042590	antigen processing and presentation of exogenous peptide antigen via MHC class I	GO_BiologicalProcess-EBI-UniProt-GOA-ACAP-ARAP_13.05.2021_00h00	2.92795e-12	4.4827e-09	24.7059	21	[B2M, CALR, HLA-A, HLA-B, HLA-C, HLA-E, HLA-F, HLA-G, IKBKB, ITGAV, PSMA3, PSMB1, PSMB10, PSMB3, PSMB8, PSMB9, PSMD6, PSMD7, PSME2, TAP1, TAP2]
GO:0045087	innate immune response	GO_BiologicalProcess-EBI-UniProt-GOA-ACAP-ARAP_13.05.2021_00h00	2.67391e-21	4.17932e-18	9.96276	107	[ADAR, ATAD3A, B2M, BPIFB1, BST2, C2, C3, C4A, C4B, C4BPB, CAMK2D, CAMK2G, CASP4, CD14, CD47, CD55, CDC42, CFB, CFD, CFI, CFP, CRISP3, CUL1, DDX60, DHX58, DTX3L, ECSIT, ERAP1, FRK, GBP2, GBP6, GRN, HERC5, HLA-A, HLA-B, HLA-C, HLA-E, HLA-F, HLA-G, ICAM1, IFI16, IFIH1, IFIT2, IFIT3, IFIT5, IKBKB, IPO7, ISG15, ISG20, LBP, LCN2, LGALS9, LTF, MUC13, MUC4, MUC5AC, MX1, MX2, MYO1E, NMI, NUB1, OAS2, OASL…
GO:0071345	cellular response to cytokine stimulus	GO_BiologicalProcess-EBI-UniProt-GOA-ACAP-ARAP_13.05.2021_00h00	6.21115e-14	9.54654e-11	8.25611	98	[ABCD4, ADAR, ASAH1, B2M, BSPRY, BST2, CAMK2D, CAMK2G, CANX, CASP4, CAV1, CD47, CD70, CDC42, CHI3L1, CIB1, CUL1, DUOX2, ECM1, EPS8, F3, FSCN1, GAB2, GBP2, GBP6, GFPT2, GIPC1, GRB2, HK2, HLA-A, HLA-B, HLA-C, HLA-E, HLA-F, HLA-G, HSP90AB1, HSP90B1, HSPA5, ICAM1, IFI16, IFIT2, IFIT3, IFIT5, IKBKB, ISG15, ISG20, LBP, LCN2, LGALS9, MCM7, MX1, MX2, MYO1E, NMI, NOL3, OAS2, OASL, PARP14, PARP9, PDE12, PH…
GO:0045088	regulation of innate immune response	GO_BiologicalProcess-EBI-UniProt-GOA-ACAP-ARAP_13.05.2021_00h00	5.97871e-11	9.03383e-08	11.976	40	[ADAR, CUL1, DHX58, ERAP1, GRN, HLA-A, HLA-B, HLA-E, HLA-F, HLA-G, IFI16, IKBKB, ISG15, LBP, LGALS9, MUC13, MUC4, MUC5AC, NMI, PARP14, PARP9, PLSCR1, PSMA3, PSMB1, PSMB10, PSMB3, PSMB8, PSMB9, PSMD6, PSMD7, PSME2, PTPN1, SERPING1, STAT1, STAT2, STING1, SYK, TRIM21, USP18, ZBP1]
GO:0051607	defense response to virus	GO_BiologicalProcess-EBI-UniProt-GOA-ACAP-ARAP_13.05.2021_00h00	1.69376e-12	2.59653e-09	13.9706	38	[ADAR, ATAD3A, BST2, DDX60, DHX58, DNAJC3, DTX3L, FLNA, HERC5, IFI16, IFIH1, IFIT2, IFIT3, IFIT5, ISG15, ISG20, MX1, MX2, NT5C3A, OAS2, OASL, PARP9, PDE12, PHB, PHB2, PLSCR1, PML, POLR3A, RSAD2, SLFN11, STAT1, STAT2, STING1, TLR3, TRIM22, UNC93B1, ZBP1, ZMPSTE24]
GO:0034340	response to type I interferon	GO_BiologicalProcess-EBI-UniProt-GOA-ACAP-ARAP_13.05.2021_00h00	2.34318e-14	3.60849e-11	24.7525	25	[ADAR, BST2, GBP2, HLA-A, HLA-B, HLA-C, HLA-E, HLA-F, HLA-G, IFIT2, IFIT3, IFIT5, ISG15, ISG20, MX1, MX2, OAS2, OASL, PSMB8, PTPN1, RSAD2, STAT1, STAT2, USP18, ZBP1]
GO:0034341	response to interferon-gamma	GO_BiologicalProcess-EBI-UniProt-GOA-ACAP-ARAP_13.05.2021_00h00	1.93679e-10	2.90905e-07	14.3541	30	[B2M, BST2, CAMK2D, CAMK2G, CD47, CDC42, GBP2, GBP6, HLA-A, HLA-B, HLA-C, HLA-E, HLA-F, HLA-G, ICAM1, LGALS9, MYO1E, NMI, NUB1, OAS2, OASL, PARP14, PARP9, PDE12, PML, SIRPA, STAT1, TLR3, TRIM21, TRIM22]
GO:0060333	interferon-gamma-mediated signaling pathway	GO_BiologicalProcess-EBI-UniProt-GOA-ACAP-ARAP_13.05.2021_00h00	2.19344e-10	3.29236e-07	21.0526	20	[B2M, CAMK2D, CAMK2G, GBP2, HLA-A, HLA-B, HLA-C, HLA-E, HLA-F, HLA-G, ICAM1, NMI, OAS2, OASL, PARP14, PARP9, PML, STAT1, TRIM21, TRIM22]
GO:0060337	type I interferon signaling pathway	GO_BiologicalProcess-EBI-UniProt-GOA-ACAP-ARAP_13.05.2021_00h00	4.98432e-15	7.69081e-12	26.3158	25	[ADAR, BST2, GBP2, HLA-A, HLA-B, HLA-C, HLA-E, HLA-F, HLA-G, IFIT2, IFIT3, IFIT5, ISG15, ISG20, MX1, MX2, OAS2, OASL, PSMB8, PTPN1, RSAD2, STAT1, STAT2, USP18, ZBP1]
