# Supplementary material for: Analysis of Nipah Virus Replication and Host Proteome Response Patterns in Differentiated Porcine Airway Epithelial Cells Cultured at the Air–Liquid Interface
Source: Viruses. 2023 Apr 13;15(4):961. doi: 10.3390/v15040961 (PMC10143807; doi:10.3390/v15040961)
Supplement: Supplementary file 1 [file viruses-15-00961-s001.zip › Table S4_Enrichment analysis_gProfiler_Neumann - Kopie.xlsx]

## Sheet: Table S4_Enrichment analysis_gP
	query	significant	p_value	term_size	query_size	intersection_size	precision	recall	term_id	source	term_name	effective_domain_size	source_order
1	query_1	TRUE	5.03416e-10	4560	289	149	0.515571	0.0326754	GO:1901564	GO:BP	organonitrogen compound metabolic process	14625	24824
2	query_1	TRUE	1.44553e-05	969	289	47	0.16263	0.0485036	GO:0006955	GO:BP	immune response	14625	2901
3	query_1	TRUE	2.1823e-05	1184	289	53	0.183391	0.0447635	GO:0006508	GO:BP	proteolysis	14625	2496
4	query_1	TRUE	4.88678e-05	812	289	41	0.141869	0.0504926	GO:0044419	GO:BP	biological process involved in interspecies interaction between organisms	14625	12824
5	query_1	TRUE	7.00485e-05	3935	289	120	0.415225	0.0304956	GO:0019538	GO:BP	protein metabolic process	14625	6791
6	query_1	TRUE	8.96329e-05	1062	289	48	0.16609	0.0451977	GO:0071705	GO:BP	nitrogen compound transport	14625	19740
7	query_1	TRUE	0.000251145	862	289	41	0.141869	0.0475638	GO:0045184	GO:BP	establishment of protein localization	14625	13203
8	query_1	TRUE	0.000391824	1329	289	54	0.186851	0.0406321	GO:0071702	GO:BP	organic substance transport	14625	19737
9	query_1	TRUE	0.000695303	457	289	27	0.0934256	0.059081	GO:0050776	GO:BP	regulation of immune response	14625	15359
10	query_1	TRUE	0.000755572	1618	289	61	0.211073	0.0377009	GO:0002376	GO:BP	immune system process	14625	1038
11	query_1	TRUE	0.00273105	775	289	36	0.124567	0.0464516	GO:0015031	GO:BP	protein transport	14625	5363
12	query_1	TRUE	0.00288086	711	289	34	0.117647	0.04782	GO:0051707	GO:BP	response to other organism	14625	16102
13	query_1	TRUE	0.00297236	712	289	34	0.117647	0.0477528	GO:0043207	GO:BP	response to external biotic stimulus	14625	12235
14	query_1	TRUE	0.00324425	848	289	38	0.131488	0.0448113	GO:0006952	GO:BP	defense response	14625	2898
15	query_1	TRUE	0.00428966	858	289	38	0.131488	0.044289	GO:0002682	GO:BP	regulation of immune system process	14625	1332
16	query_1	TRUE	0.00465949	1439	289	54	0.186851	0.0375261	GO:0008104	GO:BP	protein localization	14625	3542
17	query_1	TRUE	0.00494622	2232	289	74	0.256055	0.0331541	GO:0006950	GO:BP	response to stress	14625	2897
18	query_1	TRUE	0.00504234	3384	289	101	0.349481	0.0298463	GO:0044267	GO:BP	cellular protein metabolic process	14625	12744
19	query_1	TRUE	0.00616034	1302	289	50	0.17301	0.0384025	GO:0044248	GO:BP	cellular catabolic process	14625	12732
20	query_1	TRUE	0.00623413	365	289	22	0.0761246	0.060274	GO:0002252	GO:BP	immune effector process	14625	916
21	query_1	TRUE	0.00678908	1728	289	61	0.211073	0.0353009	GO:0033036	GO:BP	macromolecule localization	14625	9231
22	query_1	TRUE	0.00755696	1091	289	44	0.152249	0.04033	GO:0034613	GO:BP	cellular protein localization	14625	10009
23	query_1	TRUE	0.00757147	743	289	34	0.117647	0.0457604	GO:0009607	GO:BP	response to biotic stimulus	14625	3992
24	query_1	TRUE	0.00839563	490	289	26	0.0899654	0.0530612	GO:0006886	GO:BP	intracellular protein transport	14625	2842
25	query_1	TRUE	0.0087007	1097	289	44	0.152249	0.0401094	GO:0070727	GO:BP	cellular macromolecule localization	14625	19079
26	query_1	TRUE	0.0116834	37	289	7	0.0242215	0.189189	GO:0006956	GO:BP	complement activation	14625	2902
27	query_1	TRUE	0.0139581	567	289	28	0.0968858	0.0493827	GO:0033365	GO:BP	protein localization to organelle	14625	9428
28	query_1	TRUE	0.0183338	16	289	5	0.017301	0.3125	GO:0140112	GO:BP	extracellular vesicle biogenesis	14625	23020
29	query_1	TRUE	0.0191142	226	289	16	0.0553633	0.0707965	GO:0016032	GO:BP	viral process	14625	5659
30	query_1	TRUE	0.020679	1514	289	54	0.186851	0.0356671	GO:0009056	GO:BP	catabolic process	14625	3672
31	query_1	TRUE	0.0260579	491	289	25	0.0865052	0.0509165	GO:0098542	GO:BP	defense response to other organism	14625	22049
32	query_1	TRUE	0.0272934	824	289	35	0.121107	0.0424757	GO:1901565	GO:BP	organonitrogen compound catabolic process	14625	24825
33	query_1	TRUE	0.0324283	210	289	15	0.0519031	0.0714286	GO:0052547	GO:BP	regulation of peptidase activity	14625	16709
34	query_1	TRUE	0.0369996	836	289	35	0.121107	0.041866	GO:0080134	GO:BP	regulation of response to stress	14625	20932
35	query_1	TRUE	0.0383039	239	289	16	0.0553633	0.0669456	GO:0072594	GO:BP	establishment of protein localization to organelle	14625	20407
36	query_1	TRUE	0.0388127	30	289	6	0.0207612	0.2	GO:0051205	GO:BP	protein insertion into membrane	14625	15716
37	query_1	TRUE	0.0408859	323	289	19	0.0657439	0.0588235	GO:0045087	GO:BP	innate immune response	14625	13159
38	query_1	TRUE	0.0468761	881	289	36	0.124567	0.0408627	GO:0046907	GO:BP	intracellular transport	14625	14486
39	query_1	TRUE	0.0492303	10	289	4	0.0138408	0.4	GO:1903543	GO:BP	positive regulation of exosomal secretion	14625	26572
40	query_1	TRUE	1.64435e-16	6688	278	200	0.719424	0.0299043	GO:0005737	GO:CC	cytoplasm	14548	385
41	query_1	TRUE	1.59238e-09	9365	278	230	0.827338	0.0245595	GO:0005622	GO:CC	intracellular anatomical structure	14548	284
42	query_1	TRUE	1.13211e-07	672	278	39	0.140288	0.0580357	GO:0005615	GO:CC	extracellular space	14548	278
43	query_1	TRUE	4.73365e-07	1342	278	58	0.208633	0.0432191	GO:0031090	GO:CC	organelle membrane	14548	1217
44	query_1	TRUE	7.1694e-07	2280	278	82	0.294964	0.0359649	GO:0012505	GO:CC	endomembrane system	14548	817
45	query_1	TRUE	9.67771e-05	896	278	40	0.143885	0.0446429	GO:0005783	GO:CC	endoplasmic reticulum	14548	427
46	query_1	TRUE	0.000100341	1110	278	46	0.165468	0.0414414	GO:0005576	GO:CC	extracellular region	14548	241
47	query_1	TRUE	0.000192211	1027	278	43	0.154676	0.0418695	GO:0031982	GO:CC	vesicle	14548	1453
48	query_1	TRUE	0.000380967	3610	278	104	0.374101	0.0288089	GO:0032991	GO:CC	protein-containing complex	14548	1570
49	query_1	TRUE	0.00119799	68	278	9	0.0323741	0.132353	GO:1903561	GO:CC	extracellular vesicle	14548	4056
50	query_1	TRUE	0.00119799	68	278	9	0.0323741	0.132353	GO:0043230	GO:CC	extracellular organelle	14548	2131
51	query_1	TRUE	0.00119799	68	278	9	0.0323741	0.132353	GO:0065010	GO:CC	extracellular membrane-bounded organelle	14548	2719
52	query_1	TRUE	0.00385912	8445	278	195	0.701439	0.0230906	GO:0043226	GO:CC	organelle	14548	2127
53	query_1	TRUE	0.00460203	361	278	20	0.0719424	0.0554017	GO:0042175	GO:CC	nuclear outer membrane-endoplasmic reticulum membrane network	14548	2022
54	query_1	TRUE	0.0054697	63	278	8	0.028777	0.126984	GO:0070062	GO:CC	extracellular exosome	14548	2743
55	query_1	TRUE	0.00594436	4	278	3	0.0107914	0.75	GO:0000220	GO:CC	vacuolar proton-transporting V-type ATPase, V0 domain	14548	38
56	query_1	TRUE	0.00603619	7507	278	177	0.636691	0.023578	GO:0043227	GO:CC	membrane-bounded organelle	14548	2128
57	query_1	TRUE	0.00708898	7203	278	171	0.615108	0.0237401	GO:0043231	GO:CC	intracellular membrane-bounded organelle	14548	2132
58	query_1	TRUE	0.00836898	346	278	19	0.0683453	0.0549133	GO:0005789	GO:CC	endoplasmic reticulum membrane	14548	433
59	query_1	TRUE	0.0113273	8224	278	189	0.679856	0.0229815	GO:0043229	GO:CC	intracellular organelle	14548	2130
60	query_1	TRUE	0.0118387	355	278	19	0.0683453	0.0535211	GO:0098827	GO:CC	endoplasmic reticulum subcompartment	14548	3638
61	query_1	TRUE	0.0119049	90	278	9	0.0323741	0.1	GO:0140534	GO:CC	endoplasmic reticulum protein-containing complex	14548	3963
62	query_1	TRUE	0.0127921	798	278	32	0.115108	0.0401003	GO:0098796	GO:CC	membrane protein complex	14548	3627
63	query_1	TRUE	0.0221063	934	278	35	0.125899	0.0374732	GO:0031410	GO:CC	cytoplasmic vesicle	14548	1322
64	query_1	TRUE	0.0250666	940	278	35	0.125899	0.037234	GO:0097708	GO:CC	intracellular vesicle	14548	3497
65	query_1	TRUE	0.0285628	174	278	12	0.0431655	0.0689655	GO:0016324	GO:CC	apical plasma membrane	14548	863
66	query_1	TRUE	0.0355504	485	278	22	0.0791367	0.0453608	GO:0005768	GO:CC	endosome	14548	413
67	query_1	TRUE	1.92459e-08	4634	292	145	0.496575	0.0312905	GO:0003824	GO:MF	catalytic activity	14702	512
68	query_1	TRUE	0.000416179	572	292	30	0.10274	0.0524476	GO:0008233	GO:MF	peptidase activity	14702	2046
69	query_1	TRUE	0.000488112	1822	292	65	0.222603	0.0356751	GO:0016787	GO:MF	hydrolase activity	14702	3758
70	query_1	TRUE	0.000823155	1389	292	53	0.181507	0.0381569	GO:0042802	GO:MF	identical protein binding	14702	6689
71	query_1	TRUE	0.00765057	140	292	12	0.0410959	0.0857143	GO:0016874	GO:MF	ligase activity	14702	3840
72	query_1	TRUE	0.025265	5	292	3	0.010274	0.6	GO:0004668	GO:MF	protein-arginine deiminase activity	14702	1249
73	query_1	TRUE	0.0258963	3443	292	97	0.332192	0.0281731	GO:0043167	GO:MF	ion binding	14702	6774
74	query_1	TRUE	0.0262633	475	292	23	0.0787671	0.0484211	GO:0042803	GO:MF	protein homodimerization activity	14702	6690
75	query_1	TRUE	0.0357192	74	292	8	0.0273973	0.108108	GO:0008238	GO:MF	exopeptidase activity	14702	2051
76	query_1	TRUE	0.0425446	40	292	6	0.0205479	0.15	GO:1901505	GO:MF	carbohydrate derivative transmembrane transporter activity	14702	11955
77	query_1	TRUE	0.0437557	14	292	4	0.0136986	0.285714	GO:0005346	GO:MF	purine ribonucleotide transmembrane transporter activity	14702	1796
78	query_1	TRUE	0.0437557	14	292	4	0.0136986	0.285714	GO:0000295	GO:MF	adenine nucleotide transmembrane transporter activity	14702	73
79	query_1	TRUE	0.000463194	1393	195	60	0.307692	0.0430725	KEGG:01100	KEGG	Metabolic pathways	7852	181
80	query_1	TRUE	0.00393717	53	195	8	0.0410256	0.150943	KEGG:00240	KEGG	Pyrimidine metabolism	7852	25
81	query_1	TRUE	0.0146613	251	195	17	0.0871795	0.0677291	KEGG:05020	KEGG	Prion disease	7852	394
82	query_1	TRUE	0.0355401	72	195	8	0.0410256	0.111111	KEGG:04610	KEGG	Complement and coagulation cascades	7852	300
83	query_1	TRUE	0.0499854	42	195	6	0.0307692	0.142857	KEGG:04216	KEGG	Ferroptosis	7852	273
84	query_1	TRUE	3.99895e-09	695	188	50	0.265957	0.0719424	REAC:R-SSC-168249	REAC	Innate Immune System	7157	631
85	query_1	TRUE	5.42665e-08	381	188	34	0.180851	0.0892388	REAC:R-SSC-6798695	REAC	Neutrophil degranulation	7157	859
86	query_1	TRUE	0.000393248	1181	188	57	0.303191	0.0482642	REAC:R-SSC-168256	REAC	Immune System	7157	618
