# Supplementary material for: Analysis of Nipah Virus Replication and Host Proteome Response Patterns in Differentiated Porcine Airway Epithelial Cells Cultured at the Air–Liquid Interface
Source: Viruses. 2023 Apr 13;15(4):961. doi: 10.3390/v15040961 (PMC10143807; doi:10.3390/v15040961)
Supplement: Supplementary file 1 [file viruses-15-00961-s001.zip › Table S5_Enrichment analysis_gProfiler.xlsx]

## Sheet: Table S5_Enrichment analysis_gP
	source	term_name	term_id	down regulated	up regulated	p value_down regulated	p value_up regulated
1	GO:CC	extracellular exosome	GO:0070062	TRUE	TRUE	2.67913e-08	1.85198e-39
2	GO:CC	extracellular vesicle	GO:1903561	TRUE	TRUE	7.74815e-08	5.46034e-37
3	GO:CC	extracellular membrane-bounded organelle	GO:0065010	TRUE	TRUE	7.93916e-08	6.21781e-37
4	GO:CC	extracellular organelle	GO:0043230	TRUE	TRUE	7.93916e-08	6.21781e-37
5	GO:CC	cytoplasm	GO:0005737	TRUE	TRUE	0.0176476	8.14108e-35
6	GO:CC	vesicle	GO:0031982	TRUE	TRUE	0.00289745	2.66983e-33
7	GO:CC	organelle membrane	GO:0031090	FALSE	TRUE	1	3.01029e-24
8	GO:CC	endomembrane system	GO:0012505	FALSE	TRUE	1	3.54513e-24
9	GO:CC	extracellular space	GO:0005615	TRUE	TRUE	0.00112562	4.81228e-23
10	GO:BP	viral process	GO:0016032	FALSE	TRUE	1	3.53728e-20
11	GO:CC	membrane-bounded organelle	GO:0043227	TRUE	TRUE	0.000420693	4.55064e-20
12	GO:CC	cytoplasmic vesicle	GO:0031410	FALSE	TRUE	1	9.36311e-20
13	GO:CC	intracellular vesicle	GO:0097708	FALSE	TRUE	1	1.16917e-19
14	GO:BP	transport	GO:0006810	FALSE	TRUE	1	3.65782e-19
15	GO:CC	organelle	GO:0043226	TRUE	TRUE	0.00560091	4.12987e-19
16	GO:BP	establishment of localization	GO:0051234	FALSE	TRUE	1	1.54365e-18
17	GO:BP	myeloid cell activation involved in immune response	GO:0002275	FALSE	TRUE	1	2.40505e-18
18	GO:BP	granulocyte activation	GO:0036230	FALSE	TRUE	1	2.42926e-18
19	GO:BP	neutrophil degranulation	GO:0043312	FALSE	TRUE	1	3.09106e-18
20	GO:BP	neutrophil activation involved in immune response	GO:0002283	FALSE	TRUE	1	5.42241e-18
21	GO:BP	neutrophil mediated immunity	GO:0002446	FALSE	TRUE	1	2.02374e-17
22	GO:CC	endoplasmic reticulum	GO:0005783	FALSE	TRUE	1	2.26446e-17
23	GO:BP	neutrophil activation	GO:0042119	FALSE	TRUE	1	2.50977e-17
24	GO:CC	secretory granule	GO:0030141	FALSE	TRUE	1	2.87449e-17
25	GO:BP	leukocyte degranulation	GO:0043299	FALSE	TRUE	1	2.2991e-16
26	GO:BP	immune response	GO:0006955	FALSE	TRUE	1	3.16684e-16
27	GO:BP	cellular localization	GO:0051641	FALSE	TRUE	1	4.82628e-16
28	GO:BP	myeloid leukocyte activation	GO:0002274	FALSE	TRUE	1	5.84885e-16
29	GO:BP	localization	GO:0051179	FALSE	TRUE	1	7.52978e-16
30	GO:BP	leukocyte activation involved in immune response	GO:0002366	FALSE	TRUE	1	8.04963e-16
31	GO:BP	cell activation involved in immune response	GO:0002263	FALSE	TRUE	1	1.11406e-15
32	GO:BP	establishment of localization in cell	GO:0051649	FALSE	TRUE	1	1.17165e-15
33	GO:BP	biological process involved in interspecies interaction between organisms	GO:0044419	FALSE	TRUE	1	1.29398e-15
34	GO:BP	innate immune response	GO:0045087	FALSE	TRUE	1	1.39906e-15
35	GO:BP	secretion	GO:0046903	FALSE	TRUE	1	1.58755e-15
36	GO:BP	myeloid leukocyte mediated immunity	GO:0002444	FALSE	TRUE	1	1.60017e-15
37	GO:CC	extracellular region	GO:0005576	TRUE	TRUE	0.047425	5.16556e-15
38	GO:CC	intracellular membrane-bounded organelle	GO:0043231	FALSE	TRUE	1	5.56738e-15
39	GO:BP	vesicle-mediated transport	GO:0016192	FALSE	TRUE	1	1.0845e-14
40	GO:BP	immune system process	GO:0002376	FALSE	TRUE	1	1.99213e-14
41	GO:BP	immune effector process	GO:0002252	FALSE	TRUE	1	5.65406e-14
42	GO:CC	secretory vesicle	GO:0099503	FALSE	TRUE	1	6.44327e-14
43	GO:CC	mitochondrion	GO:0005739	FALSE	TRUE	1	1.23394e-13
44	GO:BP	exocytosis	GO:0006887	FALSE	TRUE	1	2.87535e-13
45	GO:BP	response to biotic stimulus	GO:0009607	FALSE	TRUE	1	3.23853e-13
46	GO:CC	cytosol	GO:0005829	FALSE	TRUE	0.0762975	4.25145e-13
47	GO:BP	regulated exocytosis	GO:0045055	FALSE	TRUE	1	4.51752e-13
48	GO:BP	defense response to other organism	GO:0098542	FALSE	TRUE	1	8.93595e-13
49	GO:CC	intracellular organelle	GO:0043229	FALSE	TRUE	1	9.05616e-13
50	GO:CC	membrane	GO:0016020	FALSE	TRUE	1	1.1931e-12
51	GO:BP	secretion by cell	GO:0032940	FALSE	TRUE	1	1.66893e-12
52	GO:CC	intracellular anatomical structure	GO:0005622	TRUE	TRUE	0.0135204	2.52669e-12
53	GO:CC	cytoplasmic vesicle lumen	GO:0060205	FALSE	TRUE	1	3.00802e-12
54	GO:CC	vesicle lumen	GO:0031983	FALSE	TRUE	1	3.75286e-12
55	GO:BP	response to other organism	GO:0051707	FALSE	TRUE	1	5.97684e-12
56	GO:BP	response to external biotic stimulus	GO:0043207	FALSE	TRUE	1	6.25129e-12
57	GO:CC	secretory granule lumen	GO:0034774	FALSE	TRUE	1	9.19382e-12
58	GO:BP	export from cell	GO:0140352	FALSE	TRUE	1	1.30262e-11
59	GO:BP	leukocyte mediated immunity	GO:0002443	FALSE	TRUE	1	2.66518e-11
60	GO:BP	response to stress	GO:0006950	FALSE	TRUE	1	2.81131e-11
61	GO:CC	organelle envelope	GO:0031967	FALSE	TRUE	1	3.648e-11
62	GO:CC	envelope	GO:0031975	FALSE	TRUE	1	3.648e-11
63	GO:BP	organonitrogen compound metabolic process	GO:1901564	FALSE	TRUE	1	3.91543e-11
64	GO:CC	endoplasmic reticulum subcompartment	GO:0098827	FALSE	TRUE	1	7.07134e-11
65	GO:BP	viral life cycle	GO:0019058	FALSE	TRUE	1	7.77505e-11
66	GO:BP	cell activation	GO:0001775	FALSE	TRUE	1	1.46686e-10
67	GO:CC	endoplasmic reticulum membrane	GO:0005789	FALSE	TRUE	1	1.47226e-10
68	GO:CC	nuclear outer membrane-endoplasmic reticulum membrane network	GO:0042175	FALSE	TRUE	1	1.61556e-10
69	GO:BP	defense response to virus	GO:0051607	FALSE	TRUE	1	2.27865e-10
70	GO:BP	defense response to symbiont	GO:0140546	FALSE	TRUE	1	2.27865e-10
71	GO:BP	leukocyte activation	GO:0045321	FALSE	TRUE	1	3.31823e-10
72	GO:CC	mitochondrial envelope	GO:0005740	FALSE	TRUE	1	3.55194e-10
73	GO:CC	mitochondrial membrane	GO:0031966	FALSE	TRUE	1	4.93955e-10
74	GO:CC	bounding membrane of organelle	GO:0098588	FALSE	TRUE	1	6.54576e-10
75	GO:BP	organic substance transport	GO:0071702	FALSE	TRUE	1	7.90945e-10
76	GO:BP	proteolysis	GO:0006508	FALSE	TRUE	1	9.79783e-10
77	GO:CC	organelle subcompartment	GO:0031984	FALSE	TRUE	1	1.77473e-09
78	GO:BP	response to virus	GO:0009615	FALSE	TRUE	1	3.42e-09
79	GO:BP	response to cytokine	GO:0034097	FALSE	TRUE	1	5.84246e-09
80	GO:BP	small molecule metabolic process	GO:0044281	FALSE	TRUE	0.15245	6.37044e-09
81	GO:BP	response to organic substance	GO:0010033	FALSE	TRUE	1	8.0059e-09
82	GO:BP	defense response	GO:0006952	FALSE	TRUE	1	9.01434e-09
83	GO:BP	regulation of response to biotic stimulus	GO:0002831	FALSE	TRUE	1	4.07884e-08
84	GO:CC	organelle lumen	GO:0043233	TRUE	TRUE	0.0405814	4.63445e-08
85	GO:CC	membrane-enclosed lumen	GO:0031974	TRUE	TRUE	0.0405814	4.63445e-08
86	GO:CC	intracellular organelle lumen	GO:0070013	TRUE	TRUE	0.0405814	4.63445e-08
87	GO:BP	macromolecule localization	GO:0033036	FALSE	TRUE	1	7.33806e-08
88	GO:CC	endoplasmic reticulum protein-containing complex	GO:0140534	FALSE	TRUE	1	7.9546e-08
89	GO:CC	vacuole	GO:0005773	FALSE	TRUE	0.808515	1.57157e-07
90	GO:CC	specific granule	GO:0042581	FALSE	TRUE	1	1.70641e-07
91	GO:BP	response to external stimulus	GO:0009605	FALSE	TRUE	1	2.05471e-07
92	GO:BP	cellular catabolic process	GO:0044248	FALSE	TRUE	0.553283	2.64076e-07
93	GO:CC	organelle inner membrane	GO:0019866	FALSE	TRUE	1	3.03827e-07
94	GO:CC	specific granule lumen	GO:0035580	FALSE	TRUE	1	3.36141e-07
95	GO:BP	cellular response to cytokine stimulus	GO:0071345	FALSE	TRUE	1	7.02222e-07
96	GO:BP	catabolic process	GO:0009056	TRUE	TRUE	0.00759217	8.37322e-07
97	GO:BP	nitrogen compound transport	GO:0071705	FALSE	TRUE	1	9.83542e-07
98	GO:BP	type I interferon signaling pathway	GO:0060337	FALSE	TRUE	1	1.18614e-06
99	GO:CC	lytic vacuole	GO:0000323	FALSE	TRUE	1	1.27289e-06
100	GO:CC	lysosome	GO:0005764	FALSE	TRUE	1	1.27289e-06
101	GO:BP	cellular response to type I interferon	GO:0071357	FALSE	TRUE	1	1.42892e-06
102	GO:BP	cytokine-mediated signaling pathway	GO:0019221	FALSE	TRUE	1	1.48136e-06
103	GO:BP	hemidesmosome assembly	GO:0031581	FALSE	TRUE	1	1.89318e-06
104	GO:BP	regulation of innate immune response	GO:0045088	FALSE	TRUE	1	2.19364e-06
105	GO:CC	membrane protein complex	GO:0098796	FALSE	TRUE	1	2.50549e-06
106	GO:CC	intrinsic component of organelle membrane	GO:0031300	FALSE	TRUE	1	2.56243e-06
107	GO:BP	intracellular transport	GO:0046907	FALSE	TRUE	1	2.64624e-06
108	GO:BP	response to type I interferon	GO:0034340	FALSE	TRUE	1	3.49693e-06
109	GO:CC	vesicle membrane	GO:0012506	FALSE	TRUE	1	3.62485e-06
110	GO:CC	mitochondrial inner membrane	GO:0005743	FALSE	TRUE	1	5.14428e-06
111	GO:BP	cellular component biogenesis	GO:0044085	FALSE	TRUE	1	6.09092e-06
112	GO:BP	cellular component assembly	GO:0022607	FALSE	TRUE	1	6.27347e-06
113	GO:CC	integral component of endoplasmic reticulum membrane	GO:0030176	FALSE	TRUE	1	6.68773e-06
114	GO:BP	establishment of protein localization	GO:0045184	FALSE	TRUE	1	6.76576e-06
115	GO:BP	protein transport	GO:0015031	FALSE	TRUE	1	7.09958e-06
116	GO:BP	regulation of response to stress	GO:0080134	FALSE	TRUE	1	8.81663e-06
117	GO:CC	integral component of organelle membrane	GO:0031301	FALSE	TRUE	1	1.13457e-05
118	GO:CC	oxidoreductase complex	GO:1990204	FALSE	TRUE	1	1.3675e-05
119	GO:BP	antigen processing and presentation of peptide antigen via MHC class I	GO:0002474	FALSE	TRUE	1	1.41956e-05
120	GO:CC	azurophil granule	GO:0042582	FALSE	TRUE	1	1.45702e-05
121	GO:CC	primary lysosome	GO:0005766	FALSE	TRUE	1	1.45702e-05
122	GO:CC	intrinsic component of endoplasmic reticulum membrane	GO:0031227	FALSE	TRUE	1	1.63295e-05
123	GO:BP	protein-containing complex assembly	GO:0065003	FALSE	TRUE	1	2.28672e-05
124	GO:BP	cellular response to organic substance	GO:0071310	FALSE	TRUE	1	2.75211e-05
125	GO:BP	carboxylic acid metabolic process	GO:0019752	TRUE	TRUE	0.00804468	2.96924e-05
126	GO:CC	endoplasmic reticulum-Golgi intermediate compartment	GO:0005793	FALSE	TRUE	1	3.01962e-05
127	GO:BP	organic acid metabolic process	GO:0006082	TRUE	TRUE	0.00459881	3.23026e-05
128	GO:BP	protein localization	GO:0008104	FALSE	TRUE	1	4.47973e-05
129	GO:BP	biological process involved in interaction with host	GO:0051701	FALSE	TRUE	1	4.57704e-05
130	GO:BP	oxoacid metabolic process	GO:0043436	TRUE	TRUE	0.012436	4.74944e-05
131	GO:BP	response to chemical	GO:0042221	FALSE	TRUE	1	5.06432e-05
132	GO:BP	organonitrogen compound catabolic process	GO:1901565	FALSE	TRUE	1	6.17456e-05
133	GO:BP	type I interferon production	GO:0032606	FALSE	TRUE	1	6.90492e-05
134	GO:BP	regulation of type I interferon production	GO:0032479	FALSE	TRUE	1	6.90492e-05
135	GO:BP	antigen processing and presentation of exogenous peptide antigen via MHC class I, TAP-dependent	GO:0002479	FALSE	TRUE	1	6.94586e-05
136	GO:BP	negative regulation of viral genome replication	GO:0045071	FALSE	TRUE	1	7.08918e-05
137	GO:BP	positive regulation of immune system process	GO:0002684	FALSE	TRUE	1	7.76477e-05
138	GO:BP	cellular response to chemical stimulus	GO:0070887	FALSE	TRUE	1	7.82711e-05
139	GO:BP	pre-replicative complex assembly	GO:0036388	FALSE	TRUE	1	9.16343e-05
140	GO:BP	interferon-gamma-mediated signaling pathway	GO:0060333	FALSE	TRUE	1	9.98364e-05
141	GO:CC	inner mitochondrial membrane protein complex	GO:0098800	FALSE	TRUE	1	0.000120854
142	GO:BP	response to stimulus	GO:0050896	FALSE	TRUE	1	0.000125492
143	GO:BP	protein-containing complex subunit organization	GO:0043933	FALSE	TRUE	1	0.000131503
144	GO:BP	cellular macromolecule localization	GO:0070727	FALSE	TRUE	1	0.00014188
145	GO:CC	vacuolar membrane	GO:0005774	FALSE	TRUE	1	0.000147317
146	GO:CC	lytic vacuole membrane	GO:0098852	FALSE	TRUE	1	0.000152567
147	GO:CC	lysosomal membrane	GO:0005765	FALSE	TRUE	1	0.000152567
148	GO:BP	regulation of viral life cycle	GO:1903900	FALSE	TRUE	1	0.000156433
149	GO:CC	spliceosomal complex	GO:0005681	TRUE	FALSE	0.000159741	1
150	GO:BP	organic substance catabolic process	GO:1901575	FALSE	TRUE	0.108775	0.00017098
151	GO:BP	antigen processing and presentation of exogenous peptide antigen via MHC class I	GO:0042590	FALSE	TRUE	1	0.00017271
152	GO:CC	secretory granule membrane	GO:0030667	FALSE	TRUE	1	0.000173862
153	GO:BP	positive regulation of response to external stimulus	GO:0032103	FALSE	TRUE	1	0.000178167
154	GO:BP	cellular protein localization	GO:0034613	FALSE	TRUE	1	0.000183018
155	GO:BP	regulation of response to external stimulus	GO:0032101	FALSE	TRUE	1	0.000222885
156	KEGG	Parkinson disease	KEGG:05012	FALSE	TRUE	0.686359	0.000225251
157	GO:BP	carbohydrate derivative metabolic process	GO:1901135	FALSE	TRUE	1	0.000230491
158	GO:CC	endoplasmic reticulum lumen	GO:0005788	FALSE	TRUE	1	0.000242695
159	GO:BP	viral genome replication	GO:0019079	FALSE	TRUE	1	0.000245187
160	GO:BP	cellular response to stress	GO:0033554	FALSE	TRUE	1	0.000285908
161	GO:BP	biological process involved in symbiotic interaction	GO:0044403	FALSE	TRUE	1	0.000298402
162	GO:CC	cytoplasmic vesicle membrane	GO:0030659	FALSE	TRUE	1	0.000328888
163	GO:BP	regulation of viral genome replication	GO:0045069	FALSE	TRUE	1	0.000339884
164	GO:BP	negative regulation of viral process	GO:0048525	FALSE	TRUE	1	0.000354813
165	GO:BP	organophosphate metabolic process	GO:0019637	FALSE	TRUE	1	0.000419017
166	GO:CC	endosome	GO:0005768	FALSE	TRUE	1	0.000456074
167	GO:BP	cell death	GO:0008219	FALSE	TRUE	1	0.000462496
168	GO:BP	regulation of viral process	GO:0050792	FALSE	TRUE	1	0.000464388
169	GO:CC	mitochondrial protein-containing complex	GO:0098798	FALSE	TRUE	1	0.000508554
170	GO:CC	ribonucleoprotein complex	GO:1990904	TRUE	FALSE	0.000524714	1
171	GO:CC	tertiary granule lumen	GO:1904724	FALSE	TRUE	1	0.000551667
172	GO:BP	RNA splicing, via transesterification reactions with bulged adenosine as nucleophile	GO:0000377	TRUE	FALSE	0.000571937	1
173	GO:BP	mRNA splicing, via spliceosome	GO:0000398	TRUE	FALSE	0.000571937	1
174	GO:BP	metabolic process	GO:0008152	FALSE	TRUE	0.924033	0.000622074
175	GO:BP	RNA splicing, via transesterification reactions	GO:0000375	TRUE	FALSE	0.000624936	1
176	GO:BP	response to interferon-gamma	GO:0034341	FALSE	TRUE	1	0.000739245
177	KEGG	Protein processing in endoplasmic reticulum	KEGG:04141	FALSE	TRUE	1	0.000739426
178	GO:BP	regulation of defense response	GO:0031347	FALSE	TRUE	1	0.000821459
179	GO:BP	intracellular protein transport	GO:0006886	FALSE	TRUE	1	0.000829097
180	KEGG	Spliceosome	KEGG:03040	TRUE	FALSE	0.000842412	1
181	GO:CC	melanosome	GO:0042470	FALSE	TRUE	1	0.00110846
182	GO:CC	pigment granule	GO:0048770	FALSE	TRUE	1	0.00110846
183	GO:BP	pattern recognition receptor signaling pathway	GO:0002221	FALSE	TRUE	1	0.00111259
184	GO:BP	RNA splicing	GO:0008380	TRUE	FALSE	0.00113391	1
185	GO:BP	regulation of immune response	GO:0050776	FALSE	TRUE	1	0.00125713
186	GO:BP	antigen processing and presentation	GO:0019882	FALSE	TRUE	1	0.00133479
187	GO:BP	positive regulation of response to biotic stimulus	GO:0002833	FALSE	TRUE	1	0.00143
188	GO:CC	nucleoplasm	GO:0005654	TRUE	FALSE	0.00148578	1
189	GO:BP	nucleotide metabolic process	GO:0009117	FALSE	TRUE	1	0.00154929
190	GO:BP	cellular response to interferon-gamma	GO:0071346	FALSE	TRUE	1	0.00169944
191	GO:BP	phosphate-containing compound metabolic process	GO:0006796	FALSE	TRUE	1	0.00176902
192	GO:BP	cellular respiration	GO:0045333	FALSE	TRUE	1	0.00182976
193	GO:BP	phosphorus metabolic process	GO:0006793	FALSE	TRUE	1	0.00182982
194	GO:BP	antigen processing and presentation of peptide antigen	GO:0048002	FALSE	TRUE	1	0.00184892
195	GO:CC	protein-containing complex	GO:0032991	FALSE	TRUE	1	0.00190645
196	GO:BP	mitochondrion organization	GO:0007005	FALSE	TRUE	1	0.00193478
197	GO:CC	mitochondrial matrix	GO:0005759	FALSE	TRUE	1	0.00194523
198	GO:BP	movement in host environment	GO:0052126	FALSE	TRUE	1	0.00224651
199	GO:BP	nucleobase-containing small molecule metabolic process	GO:0055086	FALSE	TRUE	1	0.00231086
200	GO:BP	positive regulation of type I interferon production	GO:0032481	FALSE	TRUE	1	0.00247869
201	GO:BP	positive regulation of defense response	GO:0031349	FALSE	TRUE	1	0.00251286
202	GO:BP	obsolete oxidation-reduction process	GO:0055114	FALSE	TRUE	0.297871	0.00259453
203	GO:BP	protein metabolic process	GO:0019538	FALSE	TRUE	1	0.0027004
204	GO:BP	nucleoside phosphate metabolic process	GO:0006753	FALSE	TRUE	1	0.00275055
205	KEGG	Metabolic pathways	KEGG:01100	FALSE	TRUE	0.0903105	0.00277883
206	GO:CC	tertiary granule	GO:0070820	FALSE	TRUE	1	0.00292647
207	GO:BP	protein folding	GO:0006457	FALSE	TRUE	1	0.00294909
208	GO:BP	antigen processing and presentation of exogenous antigen	GO:0019884	FALSE	TRUE	1	0.00295031
209	GO:CC	CMG complex	GO:0071162	FALSE	TRUE	1	0.00305501
210	GO:CC	organelle outer membrane	GO:0031968	FALSE	TRUE	1	0.00320237
211	GO:CC	outer membrane	GO:0019867	FALSE	TRUE	1	0.00367534
212	GO:BP	entry into host	GO:0044409	FALSE	TRUE	1	0.00385621
213	KEGG	Citrate cycle (TCA cycle)	KEGG:00020	FALSE	TRUE	1	0.00419438
214	GO:CC	focal adhesion	GO:0005925	FALSE	TRUE	1	0.00431542
215	GO:BP	viral entry into host cell	GO:0046718	FALSE	TRUE	1	0.00448191
216	GO:BP	activation of innate immune response	GO:0002218	FALSE	TRUE	1	0.0049628
217	GO:BP	regulation of immune system process	GO:0002682	FALSE	TRUE	1	0.00497895
218	GO:BP	activation of immune response	GO:0002253	FALSE	TRUE	1	0.00500034
219	GO:CC	proteasome core complex, beta-subunit complex	GO:0019774	FALSE	TRUE	1	0.00544757
220	GO:CC	ficolin-1-rich granule lumen	GO:1904813	FALSE	TRUE	1	0.0055037
221	GO:CC	azurophil granule membrane	GO:0035577	FALSE	TRUE	1	0.00562279
222	GO:BP	antigen processing and presentation of exogenous peptide antigen	GO:0002478	FALSE	TRUE	1	0.00563038
223	GO:BP	pre-replicative complex assembly involved in cell cycle DNA replication	GO:1902299	FALSE	TRUE	1	0.0057865
224	GO:BP	pre-replicative complex assembly involved in nuclear cell cycle DNA replication	GO:0006267	FALSE	TRUE	1	0.0057865
225	GO:CC	cell-substrate junction	GO:0030055	FALSE	TRUE	1	0.00600892
226	GO:CC	mitochondrial outer membrane	GO:0005741	FALSE	TRUE	1	0.0060666
227	GO:CC	peptidase complex	GO:1905368	FALSE	TRUE	1	0.00667273
228	GO:BP	positive regulation of immune response	GO:0050778	FALSE	TRUE	1	0.00691116
229	GO:BP	programmed cell death	GO:0012501	FALSE	TRUE	1	0.00706072
230	KEGG	Influenza A	KEGG:05164	FALSE	TRUE	1	0.00720504
231	GO:BP	cellular component organization or biogenesis	GO:0071840	FALSE	TRUE	1	0.00735277
232	GO:CC	endocytic vesicle	GO:0030139	FALSE	TRUE	1	0.00768033
233	GO:CC	DNA replication preinitiation complex	GO:0031261	FALSE	TRUE	1	0.00908334
234	GO:CC	MCM complex	GO:0042555	FALSE	TRUE	1	0.00908334
235	GO:BP	positive regulation of response to stimulus	GO:0048584	FALSE	TRUE	1	0.00933297
236	GO:CC	endopeptidase complex	GO:1905369	FALSE	TRUE	1	0.00954677
237	KEGG	Complement and coagulation cascades	KEGG:04610	FALSE	TRUE	1	0.0106197
238	GO:CC	nuclear lumen	GO:0031981	TRUE	FALSE	0.0110265	1
239	GO:BP	response to endoplasmic reticulum stress	GO:0034976	FALSE	TRUE	1	0.0113432
240	GO:BP	regulation of peptidase activity	GO:0052547	FALSE	TRUE	1	0.0116399
241	GO:BP	cellular component organization	GO:0016043	FALSE	TRUE	1	0.0120355
242	GO:BP	aerobic respiration	GO:0009060	FALSE	TRUE	1	0.0123403
243	GO:BP	positive regulation of innate immune response	GO:0045089	FALSE	TRUE	1	0.0131031
244	GO:BP	glyceraldehyde-3-phosphate metabolic process	GO:0019682	TRUE	FALSE	0.0133164	1
245	GO:BP	protein maturation	GO:0051604	FALSE	TRUE	1	0.0136523
246	GO:CC	endoplasmic reticulum-Golgi intermediate compartment membrane	GO:0033116	FALSE	TRUE	1	0.0140421
247	GO:BP	interleukin-27-mediated signaling pathway	GO:0070106	FALSE	TRUE	1	0.0146238
248	GO:CC	perinuclear region of cytoplasm	GO:0048471	FALSE	TRUE	1	0.0147044
249	GO:BP	stimulatory C-type lectin receptor signaling pathway	GO:0002223	FALSE	TRUE	1	0.0149492
250	GO:BP	integrin-mediated signaling pathway	GO:0007229	FALSE	TRUE	1	0.0149492
251	GO:BP	cell adhesion mediated by integrin	GO:0033627	FALSE	TRUE	1	0.0149995
252	GO:CC	ficolin-1-rich granule	GO:0101002	FALSE	TRUE	1	0.0152402
253	GO:BP	secondary alcohol metabolic process	GO:1902652	FALSE	TRUE	1	0.0156797
254	GO:BP	cellular response to lectin	GO:1990858	FALSE	TRUE	1	0.0167053
255	GO:BP	response to lectin	GO:1990840	FALSE	TRUE	1	0.0167053
256	KEGG	Proteasome	KEGG:03050	FALSE	TRUE	1	0.0189021
257	GO:CC	plasma membrane region	GO:0098590	FALSE	TRUE	1	0.0196527
258	GO:BP	necrotic cell death	GO:0070265	FALSE	TRUE	1	0.0200314
259	GO:BP	innate immune response activating cell surface receptor signaling pathway	GO:0002220	FALSE	TRUE	1	0.0207776
260	GO:CC	extracellular matrix	GO:0031012	FALSE	TRUE	1	0.0226839
261	GO:BP	innate immune response-activating signal transduction	GO:0002758	FALSE	TRUE	1	0.0231271
262	GO:BP	cholesterol biosynthetic process	GO:0006695	FALSE	TRUE	1	0.0234864
263	GO:BP	secondary alcohol biosynthetic process	GO:1902653	FALSE	TRUE	1	0.0234864
264	GO:CC	external encapsulating structure	GO:0030312	FALSE	TRUE	1	0.0235335
265	GO:CC	cell surface	GO:0009986	FALSE	TRUE	1	0.0238079
266	GO:BP	response to drug	GO:0042493	FALSE	TRUE	1	0.0250942
267	GO:BP	regulation of necrotic cell death	GO:0010939	FALSE	TRUE	1	0.0252807
268	GO:BP	purine ribonucleoside metabolic process	GO:0046128	FALSE	TRUE	1	0.0267429
269	GO:BP	aging	GO:0007568	FALSE	TRUE	1	0.0275097
270	GO:CC	proteasome core complex	GO:0005839	FALSE	TRUE	1	0.0285668
271	GO:BP	toll-like receptor signaling pathway	GO:0002224	FALSE	TRUE	1	0.0289914
272	GO:BP	nucleocytoplasmic transport	GO:0006913	FALSE	TRUE	1	0.029952
273	GO:BP	protein localization to organelle	GO:0033365	FALSE	TRUE	1	0.0311652
274	GO:BP	regulation of cell death	GO:0010941	FALSE	TRUE	1	0.03126
275	GO:BP	NIK/NF-kappaB signaling	GO:0038061	FALSE	TRUE	1	0.031648
276	GO:BP	regulation of biological quality	GO:0065008	FALSE	TRUE	1	0.031781
277	GO:BP	mRNA processing	GO:0006397	TRUE	FALSE	0.03212	1
278	GO:CC	U2-type spliceosomal complex	GO:0005684	TRUE	FALSE	0.0336773	1
279	GO:BP	nuclear transport	GO:0051169	FALSE	TRUE	1	0.0351467
280	GO:BP	positive regulation of pattern recognition receptor signaling pathway	GO:0062208	FALSE	TRUE	1	0.0353555
281	GO:BP	nucleotide biosynthetic process	GO:0009165	FALSE	TRUE	1	0.0365726
282	GO:CC	early endosome	GO:0005769	FALSE	TRUE	1	0.0366106
283	GO:BP	organic substance metabolic process	GO:0071704	FALSE	TRUE	0.295538	0.0370107
284	GO:CC	ruffle membrane	GO:0032587	FALSE	TRUE	1	0.0376191
285	GO:BP	cellular aldehyde metabolic process	GO:0006081	TRUE	FALSE	0.038296	1
286	GO:CC	respiratory chain complex	GO:0098803	FALSE	TRUE	1	0.0399455
287	GO:BP	electron transport chain	GO:0022900	FALSE	TRUE	1	0.0405773
288	GO:CC	respirasome	GO:0070469	FALSE	TRUE	1	0.0414816
289	GO:BP	protein folding in endoplasmic reticulum	GO:0034975	FALSE	TRUE	1	0.0438317
290	GO:CC	mitochondrial respirasome	GO:0005746	FALSE	TRUE	1	0.0444537
291	GO:CC	MHC class I peptide loading complex	GO:0042824	FALSE	TRUE	1	0.0465203
292	GO:BP	organophosphate biosynthetic process	GO:0090407	FALSE	TRUE	1	0.0469015
293	GO:BP	ISG15-protein conjugation	GO:0032020	FALSE	TRUE	1	0.0472438
294	GO:BP	alcohol metabolic process	GO:0006066	FALSE	TRUE	1	0.048227
295	GO:CC	catalytic complex	GO:1902494	FALSE	TRUE	1	0.0495573
296	GO:BP	nucleoside phosphate biosynthetic process	GO:1901293	FALSE	TRUE	1	0.0497796
