# Supplementary material for: Analysis of Nipah Virus Replication and Host Proteome Response Patterns in Differentiated Porcine Airway Epithelial Cells Cultured at the Air–Liquid Interface
Source: Viruses. 2023 Apr 13;15(4):961. doi: 10.3390/v15040961 (PMC10143807; doi:10.3390/v15040961)
Supplement: Supplementary file 1 [file viruses-15-00961-s001.zip › Table S6_Summary_DEGs.xlsx]

## Sheet: Table S6_Summary_DEGs
	HGNC	regulation	difference	p.value	Antigen processing and presentation_GO 0048002	Proteasome_KEGG 03050	Ribosome_KEGG 03010	Spliceosome_KEGG 03040	Type I IFN signaling pathway_GO 0060337	response to Type I IFN_GO 0071357	response to IFN gamma_GO 0034341	Pattern recognition receptor signaling pathway_GO 000221	description
1	ADAR	up	-1.336	0.000350628					X	X			adenosine deaminase RNA specific [Source:VGNC Symbol,Acc:VGNC:85097]
2	APEX1	down	1.718	0.0044457			X						apurinic/apyrimidinic endodeoxyribonuclease 1 [Source:NCBI gene (formerly Entrezgene),Acc:100154728]
3	B2M	up	-1.496	0.000880308	X						X		beta-2-microglobulin [Source:HGNC Symbol,Acc:HGNC:914]
4	BST2	up	-2.104	0.000959409					X	X	X		bone marrow stromal cell antigen 2 [Source:HGNC Symbol,Acc:HGNC:1119]
5	CALR	up	-1.767	0.00255281	X								calreticulin [Source:HGNC Symbol,Acc:HGNC:1455]
6	CAMK2D	up	-1.763	0.00922815							X		calcium/calmodulin dependent protein kinase II delta [Source:HGNC Symbol,Acc:HGNC:1462]
7	CANX	up	-1.179	0.00746079	X		X						calnexin [Source:VGNC Symbol,Acc:VGNC:86167]
8	CD14	up	-1.438	0.00470514								X	CD14 molecule [Source:HGNC Symbol,Acc:HGNC:1628]
9	CTSS	up	-1.916	0.00492035	X							X	cathepsin S [Source:VGNC Symbol,Acc:VGNC:87079]
10	CTSV	up	-1.857	0.000934458	X								cathepsin V [Source:NCBI gene (formerly Entrezgene),Acc:396926]
11	DCTN2	down	1.506	0.00392246	X								dynactin subunit 2 [Source:VGNC Symbol,Acc:VGNC:87193]
12	DDX23	down	1.15	0.00763053				X					DEAD-box helicase 23 [Source:VGNC Symbol,Acc:VGNC:103230]
13	DHX15	down	2.014	0.00145689				X					DEAH-box helicase 15 [Source:HGNC Symbol,Acc:HGNC:2738]
14	ERAP1	up	-2.032	6.24844e-05	X								endoplasmic reticulum aminopeptidase 1 [Source:VGNC Symbol,Acc:VGNC:87757]
15	ERAP2	up	-1.353	0.00215325	X								endoplasmic reticulum aminopeptidase 2 [Source:VGNC Symbol,Acc:VGNC:87758]
16	GBP2	up	-1.973	1.15582e-05					X	X	X		guanylate binding protein 2 [Source:HGNC Symbol,Acc:HGNC:4183]
17	GBP6	up	-1.903	0.00037331							X		guanylate binding protein family member 6 [Source:HGNC Symbol,Acc:HGNC:25395]
18	HLA-A;HLA-B;HLA-C;HLA-E;HLA-F;HLA-G	up	-2.238	0.00010493	X				X	X	X		major histocompatibility complex, class I, A [Source:HGNC Symbol,Acc:HGNC:4931],major histocompatibility complex, class I, B [Source:HGNC Symbol,Acc:HGNC:4932],major histocompatibility complex, class I, C [Source:HGNC Symbol,Acc:HGNC:4933],major histocompatibility complex, class I, E [Source:HGNC Symbol,Acc:HGNC:4962],major histocompatibility complex, class I, F [Source:HGNC Symbol,Acc:HGNC:4963]…
19	HNRNPA3	down	1.699	0.00106817				X					heterogeneous nuclear ribonucleoprotein A3 [Source:HGNC Symbol,Acc:HGNC:24941]
20	HNRNPC;HNRNPCL1;HNRNPCL2;HNRNPCL3;HNRNPCL4	down	1.472	0.00892062				X					heterogeneous nuclear ribonucleoprotein C [Source:HGNC Symbol,Acc:HGNC:5035],heterogeneous nuclear ribonucleoprotein C like 1 [Source:HGNC Symbol,Acc:HGNC:29295],heterogeneous nuclear ribonucleoprotein C like 2 [Source:HGNC Symbol,Acc:HGNC:48813],heterogeneous nuclear ribonucleoprotein C like 3 [Source:HGNC Symbol,Acc:HGNC:51235],heterogeneous nuclear ribonucleoprotein C like 4 [Source:HGNC Symbo…
21	HNRNPK	down	1.933	0.000565081				X					heteroous nuclear ribonucleoprotein K [Source:NCBI gene (formerly Entrezgene),Acc:100622191]
22	HNRNPM	down	1.504	0.000446308				X					heteroous nuclear ribonucleoprotein M [Source:VGNC Symbol,Acc:VGNC:88924]
23	HSP90B1	up	-0.789	0.00076182								X	heat shock protein 90 beta family member 1 [Source:VGNC Symbol,Acc:VGNC:103290]
24	HSPA1A;HSPA1B	down	1.965	0.00163936				X					heat shock protein family A (Hsp70) member 1A [Source:HGNC Symbol,Acc:HGNC:5232],heat shock protein family A (Hsp70) member 1B [Source:HGNC Symbol,Acc:HGNC:5233]
25	HSPA8	down	1.876	0.0013516				X					heat shock protein family A (Hsp70) member 8 [Source:HGNC Symbol,Acc:HGNC:5241]
26	ICAM1	up	-2.163	3.03191e-05							X		intercellular adhesion molecule 1 [Source:HGNC Symbol,Acc:HGNC:5344]
27	IFIT2	up	-2.104	0.000786316					X	X			interferon induced protein with tetratricopeptide repeats 2 [Source:VGNC Symbol,Acc:VGNC:89034]
28	IFIT3	up	-1.905	0.00154575					X	X			interferon induced protein with tetratricopeptide repeats 3 [Source:HGNC Symbol,Acc:HGNC:5411]
29	IFIT3	up	-2.084	0.000190842					X	X			interferon induced protein with tetratricopeptide repeats 3 [Source:HGNC Symbol,Acc:HGNC:5411]
30	ISG15	up	-1.615	0.00841029					X	X			ISG15 ubiquitin like modifier [Source:HGNC Symbol,Acc:HGNC:4053]
31	ISG20	up	-1.855	0.0025869					X	X			interferon stimulated exonuclease gene 20 [Source:HGNC Symbol,Acc:HGNC:6130]
32	ITGAV	up	-1.357	0.000192585	X								integrin subunit alpha V [Source:VGNC Symbol,Acc:VGNC:96380]
33	KIFAP3	up	-1.52	0.00169354	X								kinesin associated protein 3 [Source:VGNC Symbol,Acc:VGNC:89475]
34	KLC1	up	-1.059	0.00712225	X								kinesin light chain 1 [Source:HGNC Symbol,Acc:HGNC:6387]
35	LBP	up	-1.509	0.0104097								X	lipopolysaccharide binding protein [Source:HGNC Symbol,Acc:HGNC:6517]
36	LSM4	down	1.597	0.0117429				X					LSM4 homolog, U6 small nuclear RNA and mRNA degradation associated [Source:HGNC Symbol,Acc:HGNC:17259]
37	LSM6	down	1.786	0.000336922				X					LSM6 homolog, U6 small nuclear RNA and mRNA degradation associated [Source:VGNC Symbol,Acc:VGNC:89875]
38	MAP2K1	up	-1.102	0.00445808								X	mitogen-activated protein kinase kinase 1 [Source:HGNC Symbol,Acc:HGNC:6840]
39	MAP2K3	up	-1.621	0.00613287								X	mitogen-activated protein kinase kinase 3 [Source:VGNC Symbol,Acc:VGNC:99012]
40	MRPL11	down	2.073	0.00220779			X						mitochondrial ribosomal protein L11 [Source:VGNC Symbol,Acc:VGNC:90350]
41	MTG1	down	1.732	0.00163775			X						mitochondrial ribosome associated GTPase 1 [Source:HGNC Symbol,Acc:HGNC:32159]
42	MX1	up	-1.778	0.0116049					X	X			MX dynamin like GTPase 1 [Source:HGNC Symbol,Acc:HGNC:7532]
43	MX2	up	-2.001	0.00206498					X	X			MX dynamin like GTPase 2 [Source:HGNC Symbol,Acc:HGNC:7533]
44	NFKB2	up	-1.341	0.00305914								X	nuclear factor kappa B subunit 2 [Source:VGNC Symbol,Acc:VGNC:90720]
45	NUB1	up	-1.639	0.00025703							X		negative regulator of ubiquitin like proteins 1 [Source:VGNC Symbol,Acc:VGNC:90942]
46	OAS2	up	-1.891	0.00199213					X	X	X		2'-5'-oligoadenylate synthetase 2 [Source:VGNC Symbol,Acc:VGNC:91007]
47	OASL	up	-2.107	0.00303873					X	X	X		2'-5'-oligoadenylate synthetase like [Source:HGNC Symbol,Acc:HGNC:8090]
48	PGLYRP1	up	-2.141	3.79842e-06								X	peptidoglycan recognition protein 1 [Source:HGNC Symbol,Acc:HGNC:8904]
49	PIK3AP1	up	-1.556	0.00383975								X	phosphoinositide-3-kinase adaptor protein 1 [Source:VGNC Symbol,Acc:VGNC:91435]
50	PML	up	-1.189	0.00811584							X		PML nuclear body scaffold [Source:VGNC Symbol,Acc:VGNC:99296]
51	PPIH	down	1.677	0.0103397				X					peptidylprolyl isomerase H [Source:VGNC Symbol,Acc:VGNC:98215]
52	PPIL1	down	1.537	0.00290252				X					peptidylprolyl isomerase like 1 [Source:HGNC Symbol,Acc:HGNC:9260]
53	PRPF3	down	1.13	0.00142829				X					pre-mRNA processing factor 3 [Source:VGNC Symbol,Acc:VGNC:91840]
54	PRPF40A	down	1.582	0.00630847				X					pre-mRNA processing factor 40 homolog A [Source:VGNC Symbol,Acc:VGNC:98222]
55	PRPF8	up	-0.831	0.00525471				X					pre-mRNA processing factor 8 [Source:VGNC Symbol,Acc:VGNC:91846]
56	PSMA3	up	-1.778	0.00055404	X	X							proteasome 20S subunit alpha 3 [Source:VGNC Symbol,Acc:VGNC:91900]
57	PSMB1	up	-1.833	0.00596903	X	X							proteasome 20S subunit beta 1 [Source:HGNC Symbol,Acc:HGNC:9537]
58	PSMB10	up	-1.719	0.000163863	X	X							proteasome 20S subunit beta 10 [Source:HGNC Symbol,Acc:HGNC:9538]
59	PSMB3	up	-1.752	0.00117598	X	X							proteasome 20S subunit beta 3 [Source:HGNC Symbol,Acc:HGNC:9540]
60	PSMB8	up	-1.92	0.00178973	X	X			X	X			proteasome 20S subunit beta 8 [Source:HGNC Symbol,Acc:HGNC:9545]
61	PSMB9	up	-1.893	0.00165524	X	X							proteasome 20S subunit beta 9 [Source:VGNC Symbol,Acc:VGNC:91911]
62	PSMC1	down	1.708	0.00280051	X	X							proteasome 26S subunit, ATPase 1 [Source:VGNC Symbol,Acc:VGNC:91912]
63	PSMC2	down	1.368	0.0105196	X	X							proteasome 26S subunit, ATPase 2 [Source:HGNC Symbol,Acc:HGNC:9548]
64	PSMC3	down	1.859	0.000784817	X	X							proteasome 26S subunit, ATPase 3 [Source:VGNC Symbol,Acc:VGNC:100331]
65	PSMD11	down	1.4	0.00637451	X	X							proteasome 26S subunit, non-ATPase 11 [Source:VGNC Symbol,Acc:VGNC:91919]
66	PSMD4	down	1.973	6.03864e-06	X	X							proteasome 26S subunit, non-ATPase 4 [Source:VGNC Symbol,Acc:VGNC:98839]
67	PSMD6	up	-1.901	0.000843502	X	X							proteasome 26S subunit, non-ATPase 6 [Source:VGNC Symbol,Acc:VGNC:91924]
68	PSMD7	up	-1.488	0.00524705	X	X							proteasome 26S subunit, non-ATPase 7 [Source:VGNC Symbol,Acc:VGNC:91925]
69	PSME2	up	-1.879	0.00211253	X	X							proteasome activator subunit 2 [Source:NCBI gene (formerly Entrezgene),Acc:397522]
70	PTPN1	up	-1.482	0.0101575					X	X	X		protein tyrosine phosphatase non-receptor type 1 [Source:VGNC Symbol,Acc:VGNC:96519]
71	PUF60	down	1.385	0.0121961				X					poly(U) binding splicing factor 60 [Source:VGNC Symbol,Acc:VGNC:98841]
72	RBM8A	down	2.033	0.0011802				X					RNA binding motif protein 8A [Source:VGNC Symbol,Acc:VGNC:92162]
73	RIPK1	up	-1.489	0.0113461								X	receptor interacting serine/threonine kinase 1 [Source:VGNC Symbol,Acc:VGNC:92319]
74	RPL13	down	1.346	0.0127668			X						ribosomal protein L13 [Source:HGNC Symbol,Acc:HGNC:10303]
75	RPL32	up	-1.979	0.000635492			X						ribosomal protein L32 [Source:NCBI gene (formerly Entrezgene),Acc:414419]
76	RPL34	down	1.538	0.0076015			X						ribosomal protein L34 [Source:VGNC Symbol,Acc:VGNC:98957]
77	RPS11	up	-0.966	0.00791924			X						ribosomal protein S11 [Source:VGNC Symbol,Acc:VGNC:98605]
78	RPS25	down	1.73	0.00415774			X						ribosomal protein S25 [Source:HGNC Symbol,Acc:HGNC:10413]
79	RPS3	down	1.654	0.00225433			X						ribosomal protein S3 [Source:NCBI gene (formerly Entrezgene),Acc:733671]
80	RRBP1	up	-1.423	0.0050932			X						ribosome binding protein 1 [Source:VGNC Symbol,Acc:VGNC:95474]
81	RSAD2	up	-1.56	0.00132934					X	X			radical S-adenosyl methionine domain containing 2 [Source:HGNC Symbol,Acc:HGNC:30908]
82	SEC61B	down	1.29	0.0073269	X								SEC61 translocon subunit beta [Source:HGNC Symbol,Acc:HGNC:16993]
83	SLU7	down	1.546	0.01112				X					SLU7 homolog, splicing factor [Source:VGNC Symbol,Acc:VGNC:93214]
84	SNRPA1	down	1.843	0.000335796				X					small nuclear ribonucleoprotein polypeptide A' [Source:HGNC Symbol,Acc:HGNC:11152]
85	SRSF1	down	1.767	0.00385917				X					serine and arginine rich splicing factor 1 [Source:VGNC Symbol,Acc:VGNC:99084]
86	SRSF3	down	1.959	0.00156606				X					serine and arginine rich splicing factor 3 [Source:VGNC Symbol,Acc:VGNC:93475]
87	SRSF9	down	1.424	0.000466013				X					serine and arginine rich splicing factor 9 [Source:HGNC Symbol,Acc:HGNC:10791]
88	STAT1	up	-2	0.00387928					X	X	X		signal transducer and activator of transcription 1 [Source:VGNC Symbol,Acc:VGNC:95523]
89	STAT2	up	-1.257	0.00388555					X	X			signal transducer and activator of transcription 2 [Source:VGNC Symbol,Acc:VGNC:93539]
90	TAP1	up	-2.147	3.51973e-05	X								transporter 1, ATP binding cassette subfamily B member [Source:VGNC Symbol,Acc:VGNC:98358]
91	TAP2	up	-1.999	0.000974203	X								transporter 2, ATP binding cassette subfamily B member [Source:HGNC Symbol,Acc:HGNC:44]
92	TCERG1	down	1.247	0.00512582				X					transcription elongation regulator 1 [Source:VGNC Symbol,Acc:VGNC:93815]
93	TLR3	up	-1.664	0.00634563							X	X	toll like receptor 3 [Source:HGNC Symbol,Acc:HGNC:11849]
94	TPP2	up	-1.252	0.00526835	X								tripeptidyl peptidase 2 [Source:VGNC Symbol,Acc:VGNC:94343]
95	TRIM21	up	-1.548	0.000160182							X		tripartite motif containing 21 [Source:VGNC Symbol,Acc:VGNC:94398]
96	TRIM22	up	-1.853	0.0111492							X		tripartite motif containing 22 [Source:HGNC Symbol,Acc:HGNC:16379]
97	U2AF2	down	2.092	0.00020997				X					U2 small nuclear RNA auxiliary factor 2 [Source:VGNC Symbol,Acc:VGNC:94623]
98	UBE2D2	down	1.648	0.0119785								X	ubiquitin conjugating enzyme E2 D2 [Source:VGNC Symbol,Acc:VGNC:98391]
99	UBE2V1	down	2.073	0.000148297								X	ubiquitin conjugating enzyme E2 V1 [Source:VGNC Symbol,Acc:VGNC:98393]
100	UNC93B1	up	-1.566	0.00124772	X							X	unc-93 homolog B1, TLR signaling regulator [Source:VGNC Symbol,Acc:VGNC:94712]
101	USP18;USP41	up	-1.887	4.73985e-05					X	X			ubiquitin specific peptidase 18 [Source:HGNC Symbol,Acc:HGNC:12616],ubiquitin specific peptidase 41 [Source:HGNC Symbol,Acc:HGNC:20070]
102	USP39	down	1.938	0.00254618				X					ubiquitin specific peptidase 39 [Source:VGNC Symbol,Acc:VGNC:94763]
103	XAB2	up	-1.005	0.00381001				X					XPA binding protein 2 [Source:VGNC Symbol,Acc:VGNC:94992]
